# Supplementary material for: Shuffling of cis-regulatory elements is a pervasive feature of the vertebrate lineage
Source: PubMed Central journal article supplement (PMC1779573; doi:10.1186/gb-2006-7-7-r56), 2006-07-19

### PRE-GENE SCE distribution

Wilcoxon rank sum test p-value =  $2e-09$

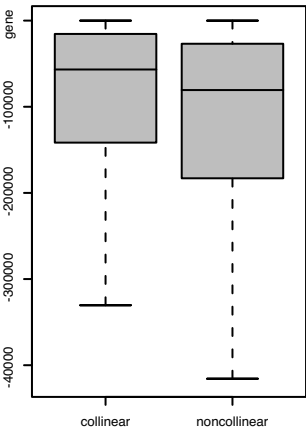

### INTRON START SCE distribution

Wilcoxon rank sum test p-value = 0.651

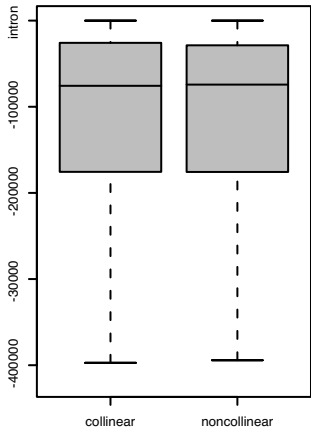

### POST-GENE SCE distribution

Wilcoxon rank sum test p-value =  $4.845e-06$

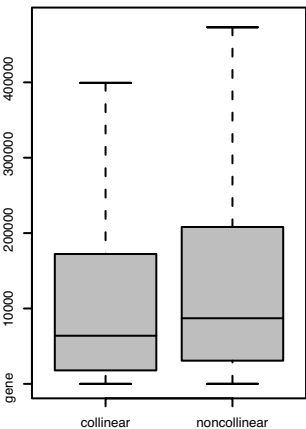

### INTRON END SCE distribution

Wilcoxon rank sum test p-value = 0.113

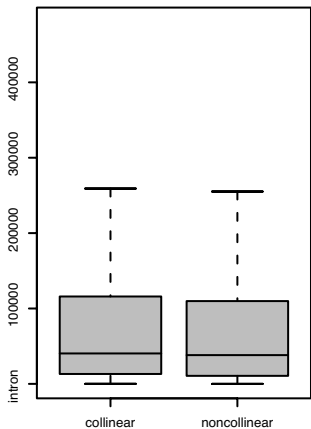

Supplement: gb-2006-7-7-r56-S2.pdf [file gb-2006-7-7-r56-S2.pdf]
