# Supplementary material for: Shuffling of cis-regulatory elements is a pervasive feature of the vertebrate lineage
Source: PubMed Central journal article supplement (PMC1779573; doi:10.1186/gb-2006-7-7-r56), 2006-07-19
Supplement: gb-2006-7-7-r56-S4.pdf [file gb-2006-7-7-r56-S4.pdf]

# Tested Fragments

Regions within gene structure context, details of conserved regions, sequences of conserved regions, and multiple alignments of conserved element.

---

---

## Fragment Pax2\_31027

Representation of conserved regions within their genic context

Within the mouse context is shown the rCNE from which the tested SCE is derived (red diamond)

Within the fugu context all CHAOS hits obtained from the mouse rCNE are shown (green diamonds, in red the one tested)

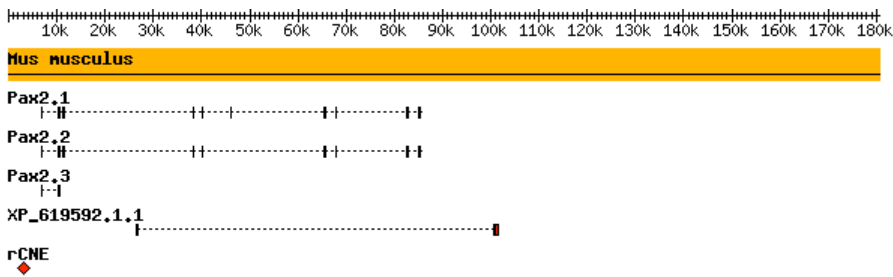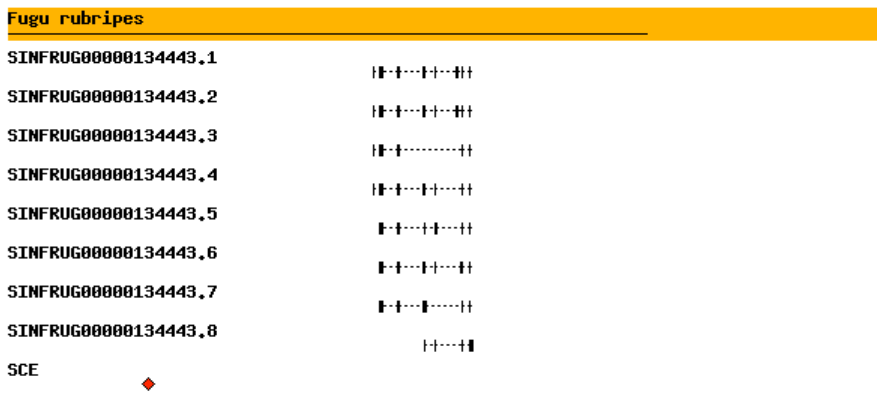

---

Conserved regions shown within 2000bp context

The mouse context contains:

- rCNEs green boxes, in red the one considered for this test
- SCEs yellow boxes, in red the one considered for this test
- CHAOS hits blue boxes, in red the one considered for this test

The fugu context contains:

- the fragment amplified in this test
- CHAOS hits blue boxes, in red the one considered for this test

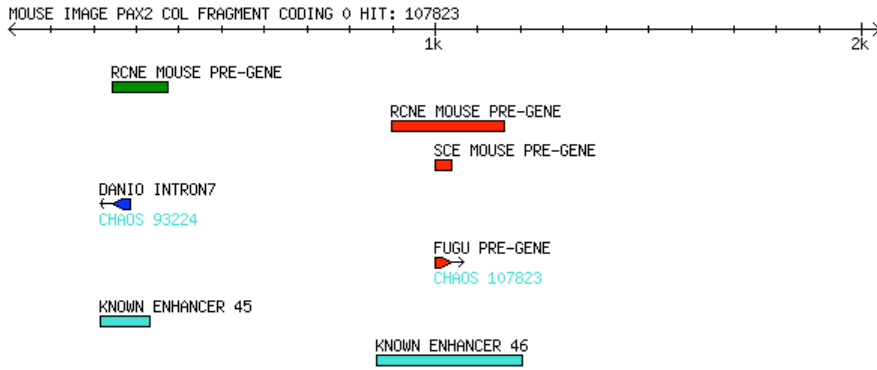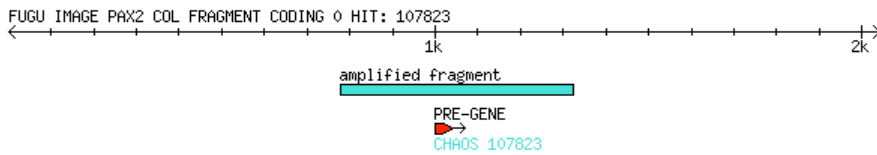

## SEQUENCES

```
>fugu_fragment_for_primer_design_31027
AGTACGGCGACACTTCTGGAAACATATTTGGGCCTTGTATATTGAATGAAATGCTAATTC
TCACAGACTGTCTGGATTATGGCTCTTTGTGTGCACGCGTGGCCCTCGGGCCGTGCGTGC
ACGTAGTGTCTTATGTCAAAAAACGATCTAAAGAAATGTGAAAAACAAATTTTTTATAAAT
GCAGCTCTACAATATCGGCTCTAGCTGTGTAGGAACATTAAGGACATAAATGTAGCTTT
GGCTCAGGAGGAAAGGTTTTAAGAGAAACTGTTGCTCCTTGGACAGCCTGCAGATGTGGG
AGTCACTGAAAGCATCAATAAGTGTTTGAAGGGATGTTAAGCAGCAGGCCGCCAGCATC
TGTTTTAAACCCCAACCCGACCCCTTTCTGAACCTTACCCTTTCTTTGTGTGGGGACT
TGGACAAAAGCCATAGTTCCTTCTGGTCTGTCAAAGCTATTCATAATCAACCAACCATG
GCCTCCCTTCAAAGAAATAGGAAGACATTTATTCAGCTTCCCTCTGATCTTGGGGCCA
CAACAAACCATGTAAGCCATGGCTGACTGGTTAAAGCAGGGGGTGGGGAGGGAAGAGGGG
CACAAATGTCCTCCTGTCAGCAGCTGCAGATACAGAGGCCGACGAGCACCACGTGACCCCTT
CGACCCTCTTCAACCATGGTGGCCACACTGCTGAGCAGTGCCTCCGAGATAGAAGCCT
TGAACCTTACACACTGGCGGGGTGAGAGTCAAGGTCACAGCGGACGGACTGTAGTTAACTAACCA
ACCACGAGTGAAACTCGGACAAAACAGTTTGCCTCATGAAACAGTTCCACGTTGTGAGCG
TGCAGTCAAAAATCCTGGAAAGGTGAAATGAGTCGGTAACAAGATGAAGATATCGAGGCC
GCCGCAACACGAGCGCTGCACCTAAGCTCATTTCCACGACTGACTGAAATGTAGAGACT
TAAACACTCACCCAGAACATTTACTGGCTGACGGTTCAGTTTCCCAAAGTGACAC
GCAGATTTAAATTTAAGGAGGAGCAGAAGTCTTCGCATTTATTCATTAATAAAGATGAAG
CCGGCGGAGGAGTGTGTTGTCATAGGAGATAACCGGACGGGAAAACGTGGGCACGAAAC
CGCCACGCGTGTGATCAGCAAAGGCACCTTTTCATCCAGAAAATGAAAAGACAAAATGAT
```

CATTTGTCAATTTCTAAGCAAGAACAGTTTTAATGGGCCACTTTAGAATCGGTTATTAC  
TCCACTGAGTAACGTTGATTCATAAGAGTAATGCCAATGATCACAGAGGCCAGGCTGA  
ATGTTAAATAGGTAAGAGCCCTGTGGCAGAGCATTGGCCCCCTGTTACCCTTAGCCC  
TATTTGGCTGGCTCACTCGCGCTCATAAATTAAGACCCCTACTGTGAATATAAATGGCC  
CCTCAATCAATAGTGATAGAGAGAAAATAAGAGACGGAGACGTGGAGACCACGGGCATAT  
CTCAGGGGCAACATGATAGCATTATGAAAGGAGCAGCTTGAAGCAGCTTTTACTCTGA  
CAGGGGCAACAGTTGTAATGTCCCTCGGGGAGCAGAGCGCTTGTATTAGAAAAC  
AATTTCTCCCTCAGGCCACTTCTCCAGCCTGAGGGCTCACTGATCTGCGTGTCA  
CTTCTGCGCCCTTATCCACCCTTCCAAACACTTTTCATGTGTGACAGGAAGCCGCGGTG  
CCTGTGGTTTTCGCGTCACTCCAGATTAACCAGCGATTCATGAATATTACTCGCAGTCAC  
ATCAGAAAATTTGTGCAACGCCAGAGACGTGGCGCCATGTGCCACGCATACATCATTT  
CAAATATTTAGCCAGTTCCCTGGCTAATTTCAAAGGTTTATTTCTGAAATGAATCCCTT  
TTGTCAAATCCATGTATCCCTGCAAACTAAAGCAACATTACTGTTTGTGTAATAATTG  
ACCTGTAATGTAGATTAAGCTGGGTAGTGGTGGTGGTGGGGAGGGGTTTTGTACNNNN

>amplified\_fugu\_segment

AACCCAGAGTGAACCTCGGACAAAACAGTTTGCCTCATGAAACAGTTCCACGTTGTGAGC  
GTGCACTGCAAAATCTGGAAAGGTGAATGAGTCCGTAACAAGATGAAGATATCGAGGC  
CGCCGCAACCAAGCGCTGCACCTTAAGCTCATTTCCACGACTGACTGAAATGTAGAGAC  
TTAAAACACTCACCCAGAACATTTACTGGCTGGACGGTTCCAGTTTCCAAAAGTGACA  
CGCAGATTTAAATTTAAGGAGGAGCAGAAGCTTTCGCATTTATTAATAAAGATGAA  
GCCCGCGGAGGATGTTTGGTCTAGGAGATAACCGGACGGGAAAAACGTGGGCAGGAAA  
CGCGCACCGTGTGATCAGCAAAAGGCATTTTCATCCAGAAAATGAAAAGCAAAATGA  
TCAATTTGTCAATTTCTAAGCAAGAACAGTTTTAATGGGCCACTTTAGAATCGGTTATTA  
CTCCACTGAGTAACGTTGATTTCTATAAGAGTAATGCCAATGATCACAGAGGCCAGGCTG  
AATGT

>rCNE\_mouse\_sequence\_130793

AGCAGAGAAGCGAAGGAAGTCCACAAGGAAGATTTATTGGGCAGATCAGATGCA  
CAGAGGCGACTAATGAAGCAAAATCCCGAGATGGGTATCAGAGCAACTCCCCAAAAGTTTA  
TTTGCTTTTAAATTTCCGAGGAGGGGGCTCCTTGTGTTGAAGTGTAAATGCCCTTAGG  
TTGTGGGGGGTGTGAAGGGTCTTTGAAAACACTAGAGAGAAAAGTTTCATTTAGAG  
TCAGATGAGGAAAAGCAACCAA

>SCE\_mouse\_sequence\_130927

CAACTCCCCAAAAGTTTATTTGCCTTTAAATTTCCGCGAGG

FUGU HITS IN THE CONTEST OF MAMMALIAN rCNE

CLUSTAL W (1.83) multiple sequence alignment

```
ENSCAFG00000009709    AGCGGAGACGGCGAAGGAACGGAGATCCACAAGGAAGATTTATTGGGCAGATCAGATGCA
ENSG00000075891      AGCCGAGAAGGCAAGGAGCCGAGATCCACAAGGAAGATTTATTGGGCAGATCAGATGCA
ENSMUSG00000004231   AGCAGAGAAGCGAAGGAAGTCCACAAGGAAGATTTATTGGGCAGATCAGATGCA
ENSRNOG00000014253   AGCAGAGAAGCGAAGGACTGAGATCCAGGGAAGATTTATTGGGCAGATCAGATGCA
SINFRUG00000134443   -----
```

```
ENSCAFG00000009709    CAGAGGCGCTAATGAAGCAAAATCCCGAGATGGGTATCAGAGCAACTCCCCAAAAGTTTA
ENSG00000075891      CAGAGGCGCTAATGAAGCAAAATCCCGAGATGGGTATCAGAGCAACTCCCCAAAAGTTTA
ENSMUSG00000004231   CAGAGGCGCTAATGAAGCAAAATCCCGAGATGGGTATCAGAGCAACTCCCCAAAAGTTTA
ENSRNOG00000014253   CAGAGGCGCTAATGGAGCAAAATCCCGAGATGGGTATCAGAGCAACTCCCCAAAAGTTTA
SINFRUG00000134443   -----CAGTTTCCAAAAGTGCA
                        ** * ***** *
```

```
ENSCAFG00000009709    TTTGCC--TTTAAATTTCCGAGGAGGGCGGGCTCTTGTGTTGAAGTGTAAATGCCCTTA
ENSG00000075891      TTTGCC--TTTAAATTTCCGAGGAGGGCGGGCTCTTGTGTTGAAGTGTAAATGCCCTTA
ENSMUSG00000004231   TTTGCC--TTTAAATTTCCGAGGAGGGCGGGCTCTTGTGTTGAAGTGTAAATGCCCTTA
ENSRNOG00000014253   TTTGCC--TTTAAATTTCCGAGGAGGGCGGGCTCTTGTGTTGAAGTGTAAATGCCCTTA
SINFRUG00000134443   CACGCAGATTTAAATTTAAGGAGG-----
                        ** ***** * **
```

```
ENSCAFG00000009709    GGTGTG-----GGGGTG--GAAGGGCCGCTTTGAAAACACCAGAGAGAAAAGGTTTCATT
ENSG00000075891      GGTGTG-----GGGGTG--GAAGGGCCGCTTTGAAAACACCAGAGAGAAAAGGTTTCATT
ENSMUSG00000004231   GGTGTGTG---GGGGGTGTTGAAGGGCTGCTTTGAAAACACTAGAGAGAAAAGGTTTCATT
```

```

ENSRNOG00000014253      GGTGGGANNNNNNNTGTTGAAGGGCTGCTTTGAAAACACTAGAGAGAAAAGGTTTCATT
SINFRUG00000134443      -----

```

```

ENSCAFG00000009709      TAGAGGCAGACG--GGAAAAGCAACCAA
ENSG00000075891         TAGAGGCGGACG--GGAAAAGCAACCAA
ENSMUSG00000004231      TAGAGTCAGATGAGGGAAAAGCAACCAA
ENSRNOG00000014253      TAGAGTCAGATGAGGGAAAAGCAACCAA
SINFRUG00000134443      -----

```

## Fragment Zfpm2\_23818

Representation of conserved regions within their genic context

Within the mouse context is shown the rCNE from which the tested SCE is derived (red diamond)

Within the fugu context all CHAOS hits obtained from the mouse rCNE are shown (green diamonds, in red the one tested)

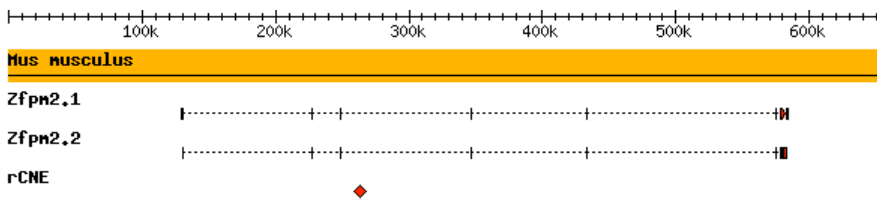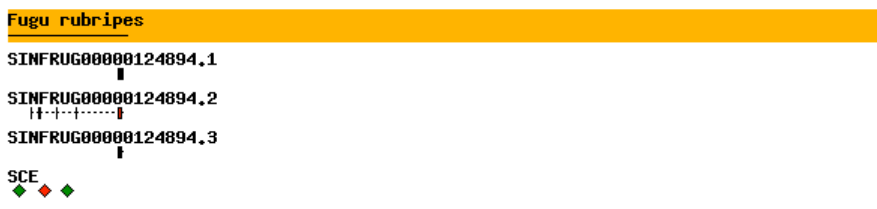

Conserved regions shown within 2000bp context

The mouse context contains:

- rCNEs green boxes, in red the one considered for this test
- SCEs yellow boxes, in red the one considered for this test
- CHAOS hits blue boxes, in red the one considered for this test

The fugu context contains:

- the fragment amplified in this test

-CHAOS hits blue boxes, in red the one considered for this test

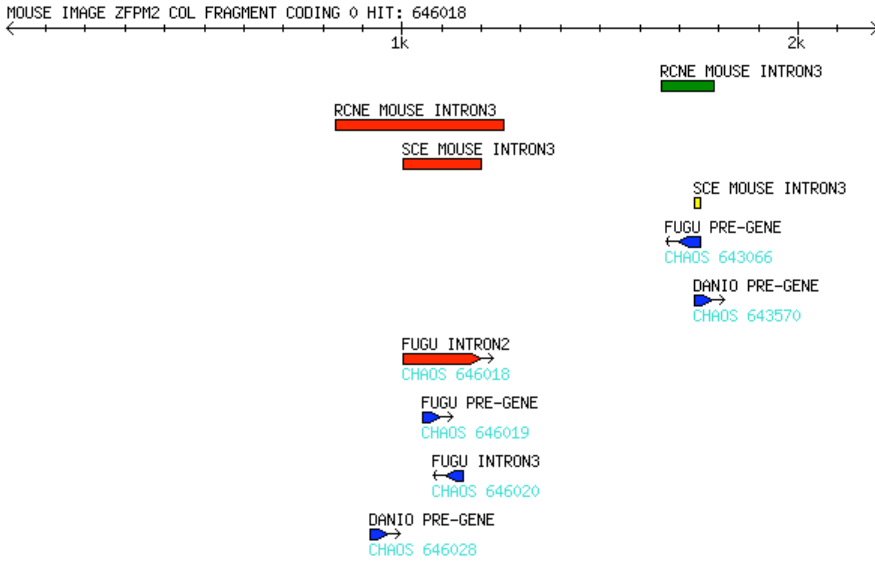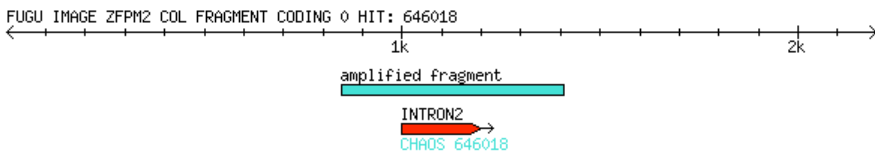

SEQUENCES

```
>fugu_fragment_for_primer_design_23818
GTTAAGTCACAAAGCTGTGACCGTATTAATGTTATAGCAAATGCCACACTACTTATTTCGA
TGGTCTGTTTTAGCGTGACGACCACGTGGCGGCTGCATGGTCGTCTCCCCCTCCTCGGC
CAGCCTGTGGCGCGTGGGTGCCAGCTGGGCGTCGGCCAGAGAGAGGGGGGGTCACTCTG
TAGGAGCGGGCACTGAGAATCCCCCTAATGGCCAGACCCAGACAACTAAGGGCAAAGGT
GCACCCCCACCCCGCCCTCTCACCCGCGCCTGCCTTGAGAACAACATCCATTTTCATGT
ACCTCCTTCCTTCCTTCGGCTTTAAAACATCAAACGTGCACATGCTGCTAACGCAGCTT
CGCTTAGATGCTNNNNNNNNNGCTGCAAGTGTGCGACCGATCTTACCGTCTCCAGAAA
AAGACACAATAGCCATTTTCAGGTTTACCAGCACATATGCCATGCTAGGCGATCTGGAAGAG
CAGATGGCCACGCTGGTGTGACAGGTGCCTCGACAAAATGTTTGGGTCGCCCCGTGCTGCT
ATTTATAACACGGTGCAACACAGACATGCAATAATTTGCGAAAAAAGGACAGGGGGGCC
TTTTTGTTCGAGTCAAAGTGGTCACCGTCAGAAACAGATGGGATTAACATTTTGGGCA
TCGTTTCATCAGACCTGAAGAATTTATTTCTGTAGGAGAAACAGGAAGTCTGGAAG
TGGTGAAGTGTAGCCACTCTGTCCGTAACAGACTCTCCTCTTTCATCTTTGAAATTA
AATGTTCCGCTCTTTCCGCAATTTAGGGCGCGGAAGCATTTTTAGCCCTCAGCTGCAGCTTA
ACTGAGCATACAGTFCGCCAAACTCTGCTGCGCATACAGCAAAAAAAGTCCACTGGAGCA
GAGTTTCAGTCAAGTTCCTCCTCGGTAACAAGGCATTTTCCAACCTCAGCACCCGAGTCCAC
GATAAAGTCGGGGCGTCTCAAGGAAGGAGGGGGGGTGGAAATGAGCGCAAGAGACAAA
CGCAGAGCCAGATGCAGATTAGGCTGCAGAAGATGAGGGTGTAAAAGGGATTTAATGGT
AGGATGGATTAGAGAAATCCTTGTAAACAATGTTAAATAATATGTTTTCAGCCGAGATCA
AAGCGCCACTGATTGAACCCCTCAAGCCTTCAGAACACGGAGTCTTGGAAAGCAAAGATT
GGTAAACTAGTGTCTCAGACCACTCCGGCTGCTCCAGTTAAATTGGATTGGAATATTAGG
ATACAGATGAATCCGTCAGGAGGCTTTCACAAAGCTTTTGTACCAGAAATGTAGCTTGG
GAACGGTATGAAAGGTTTGTAGAGCAGTGTCTGCAAGAATCGTAAGACGAGGGGTGCA
CAGCTGTCTCCGCTGATACCTAAGCGTTTAAAGTAGACTTATAGACACACTTGACTGTTA
```

TATCAGCGGACCCAAAACCTTCAGCGCCGGCATTATTCGAGGTTTAAATTTTTTCTTCT  
TCTCTTCGTCFCCCAATCAAGAAATTTGGACGTGCATCACGGCGGTTTCGCTGGGAA  
AAAGGAAGGTTTTATCTTGTCTCCAGGGGTTTATTCGAGTCCGCCGCGTCCAC  
AAAACATGAATGACACGGAGATGGCCGATACATGATGAAAGTCCGTCATCAGCTCCTC  
GCCACGTTCCAGGCCCCCGAGTGTAGAAATFAAATCGCAATCAAAGTGTGTTGTGTA  
ACACCGCGCCCTGTTTTCGCCAAATGTATTTGTTCCAGAGATGCTGATTAAGGCC  
TTTACGCCATCACTGGATGCGGAGCGTCCCTGCCCGCENNENNNNNNNNNNNNN  
NNNNNNNNNNNNNNNNNNNNCTTTTGCATTTCAAAATGTGTGAATATAGTGATGAAA  
TATGCAACAAGAGATTAGACAAATCACTGTACTGTGCATCGCCTTGATGCAAAATTTAGT  
CACTGATCCGTTATACTAAGAGGCTTTATGCAGGAACATCATGGTTGTAGTTATATAAT  
CTAAAATAGGGCAAAATGCAATCAGCGTCTTATCATCTGAAGAAGATGTCATTACATTC  
AGTTCTAGTTTTTTAGGGGACGTAGCACATTTGAAAACATTTCAATAAGATAATTCATTT  
TCCAGCCATTTTATFCACATTTTCAGCTGAATTTGTGT

---

>amplified\_fugu\_segment

GCATACAGTCCGCAAACTCTGCTGCGCATACAGCAAAAAAGTCCACTGGAGCAGAGTT  
CAGTCAGGTCTCTCGTAAACAAGGCATTTTCCAACTCAGCACCCGAGTCCACGATAA  
AGTCGGGGCGTTCAGGAGGAGGGGGGGTGAATGAGCGCAAGAGCAAAACGCAG  
AGCCAGATGCGAGATTAGGCTGCAGAAGATGAGGGGTGAAAAGGGATTAAATGGTAGGAT  
GGATTAGAGAAATCCTTGTAAACAATGTTAAATAATTATGGTTCCAGCCGAGATCAAAGCG  
CCACTGATTTGAACCCCTCAAGCCTTCAGAACCGGAGTCTTGAAAGCAAGATTTGTTAA  
ACTAGTGTCTAGACCACTCCGGCTGCTCCAGTTAAATTTGGATTGGAAATATTTAGGATACA  
GATGAATCCGTCAGGAGGCTTTCACAAAGCTTTTGTCCAGGAAATGTAGCTTGGGAACG  
GTATGAAAGGTTTGTAGCGCACTGTCTCTGCAGAATCGTAAGACGAGGGTGTACAGCT  
GTCTCCGCTGATACCTAAGCGTT

---

>rCNE\_mouse\_sequence\_610907

GAATAGTGGATGATACTGGTGTAAAGAGCTCAATAGAGCCCTCAAAGGTACAGCCAAATGCA  
TACAGCATTTTTGTCAGATTTCATTTGTAAGAAAATAATTTTATTAGAGTGAAGAGAGA  
AGAGAGAGAAACCACAGTGAAGCCTTGGGAGAAATGCAGGCTCCTGATGAGACCAGCAGA  
GAAGACACTCAGCGTTACATGCAGATTAGTCTCAGAAAGATGAGGGGTGAAAAAGGA  
TTTTAATGGTGTGTTGATTATAGAAATCCATGTAACAATGTTAAATAATTTATAGTTCCAG  
CAGAGATCAAAGCAGCGCTGATTGAAGGCCCTCAAGCTGTAAACATGAAGTATCTTGAAG  
GGGAAAAACCCCGCTCAGAGATTGGTCAACCTGGCGAGGCATGTCTATGATTTGTCT  
TCTGT

---

>SCE\_mouse\_sequence\_611046

GAGACCAGCAGAGAACAGACTCAGCGTTCACATGCAGATTAGTCTCAGAAGATGAGG  
GTGTAAGAGGATTTAATGGTGTGTTGATTATAGAAATCCATGTAACAATGTTAAATAA  
TTATAGTTCCAGCAGAGATCAAAGCAGCGCTGATTGAAGGCCCTCAAGCTGTTAAACATGA  
AGTATCTTGAAGGGGAAAA

---

FUGU HITS IN THE CONTEST OF MAMMALIAN rCNE

CLUSTAL W (1.83) multiple sequence alignment

|                    |                                                                 |
|--------------------|-----------------------------------------------------------------|
| ENSRNOG0000004109  | GAATAGTAGATGATACTGGTGTAAAGAGCTCAATAG--AGCTCTCAGAAGTAGAGCAAATG   |
| ENSMUSG00000022306 | GAATAGTGGATGATACTGGTGTAAAGAGCTCAATAG--AGCCCTCAAAGGTACAGCCAAATG  |
| ENSG00000169946    | GAATGGTGGATGATACTGCTAT-----TCAATAGGGAGCTCTTAAAAATAGAGCAAATG     |
| ENSCAFG0000000678  | GAATGGTGGATGATACTGGTAT-----TCAATAGGGAGCTCTTAAAAATAGACCAAATG     |
| SINFRUG00000124894 | -----                                                           |
|                    |                                                                 |
| ENSRNOG0000004109  | CACACCACATTTTG-GCAGATTTCAATTTGTAAGAAAATGATTTTATTAGAGTACAAGAG    |
| ENSMUSG00000022306 | CATACAGCATTTTT-GCAGATTTCAATTTGTAAGAAAATAATTTTATTAGAGTGAAGAG     |
| ENSG00000169946    | CATAAGACATTTTTTACAGTTTCAATTTGTAAGAAAATGATTTTATTAGAGGGGAAAAA     |
| ENSCAFG0000000678  | CAGAAGACATTTTT-GCCGTTTTATATTTGTAAGAAAATGATTTTATTAGAGGGGAAAAA    |
| SINFRUG00000124894 | -----                                                           |
|                    |                                                                 |
| ENSRNOG0000004109  | AGAAGAGA---AACCACAGTGAAGACTTGGAAAGATGCAGGCTCCTGATGAGACCAGC      |
| ENSMUSG00000022306 | AGAAGAGAGAGAAAACCACAGTGAAGCTTGGGAGAAATGCAGGCTCCTGATGAGACCAGC    |
| ENSG00000169946    | AGAGAGAGAGAAAACCATCAGTCAGGATGTGGGAGAAATGCAGGCTCCTGATGAGACCAGC   |
| ENSCAFG0000000678  | AGAGAAA---AAAACCTTCAATTTGGGAATGTTGGAAAGATGCAGGCTCCTAAGGAGACCAGC |
| SINFRUG00000124894 | -----GAAATGAGC                                                  |

\*\* \* \*\*

```

ENSRNOG0000004109      AGAGAAGACGGACTCAGTGTTCACATGCAGATTAGGCCTCAGAAGATGAGGGGTGAAAAA
ENSMUSG00000022306      AGAGAAGACGACTCAGCGTTCACATGCAGATTAGTCTCAGAAGATGAGGGGTGAAAAA
ENSG00000169946         GGAGAAGACAAACTAAGTGTATGGATGCAGATTAGGCCTCAGAAGATGAGGGGTGAAAAG
ENSCAFG0000000678         GGAGAAGACAAACTAAGTCCACAGATGCAGATTAGGCCTCAGAAGATGAGGGCGTAAAAG
SINFRUG00000124894      GCAAGAGACAAACGCAGAGCCAGATGCAGATTAGGCCTCAGAAGATGAGGGGTGAAAAA

```

\* \*\* \* \*\* \* \* \* \* \* \* \* \* \* \* \* \* \* \* \* \* \* \* \* \* \* \* \* \* \* \* \* \*

```

ENSRNOG0000004109      GGATTTAATGGTGGGGTGGATTATAGAAATCCATGTAACAATGTTAAATAATTATAGTTC
ENSMUSG00000022306      GGATTTAATGGTGGTGTGGATTATAGAAATCCATGTAACAATGTTAAATAATTATAGTTC
ENSG00000169946         GGATTTAATGGTGGGGTGGATTATAGAAATCCATGTAACAATGTTAAATAATTATAGTTC
ENSCAFG0000000678         GGATTTAATGGTGGGGTGGATTATAGAAATCCATGTAACAATGTTAAATAATTATAGTTC
SINFRUG00000124894      GGATTTAATGGTAGGATGGATTAGAGAAATCCTTGTAAACAATGTTAAATAATTATAGTTC

```

\*\*\*\*\* \* \* \* \* \* \* \* \* \* \* \* \* \* \* \* \* \* \* \* \* \* \* \* \* \* \* \* \*

```

ENSRNOG0000004109      CAGCAGAGATCAAAGCAGTGTGATTGAAGGCCCTCAAGCTGTTAACATGAAGTATCTTG
ENSMUSG00000022306      CAGCAGAGATCAAAGCAGCGCTGATTGAAGGCCCTCAAGCTGTTAACATGAAGTATCTTG
ENSG00000169946         CAGCCGAGATCAAAGCAGTGTGATTGAAGGCCCTCAAGCTGTTAACATGAAGTATCTTG
ENSCAFG0000000678         CAGCCGAGATCAAAGCAGTGTGATTGAAGGCCCTCAAGCTGTTAGCACGAAGTATCTTG
SINFRUG00000124894      CAGCCGAGATCAAAGCGCCACTGATTGAAC-CCTCAAGCCTTCAGAACACGGAGTCTTG

```

\*\*\*\* \* \* \* \* \* \* \* \* \* \* \* \* \* \* \* \* \* \* \* \* \* \* \* \* \* \* \* \*

```

ENSRNOG0000004109      GAGGGG---AAAAAACC--GCCTCAGAGGTGGTCAACCTGAGCAGACAACGACTGTGA
ENSMUSG00000022306      AAGGGG---GAAAAACCCCGCCTCAGAGATTGGTCAACCTGGGCAGGCATTGTCTATGA
ENSG00000169946         AAGGG-----AAAAAACCTGCCCTCAAAGATTGGTCAGTCTGGGCAACAATGTCTGTGA
ENSCAFG0000000678         AAGGGGGNNNNNNNCTGCCCTCAGAGATTGGTCATCCTGAGTAAACTGTATCTGTGA
SINFRUG00000124894      GAAAGC----AAAGA-----

```

\* \*

```

ENSRNOG0000004109      TCTGTCCAAGT
ENSMUSG00000022306      TTTGTCTCTGT
ENSG00000169946         TCTGTAGAAGT
ENSCAFG0000000678      TCTATAGAAGT
SINFRUG00000124894      -----

```

# Fragment Zfpm2\_23838

Representation of conserved regions within their genic context

Within the mouse context is shown the rCNE from which the tested SCE is derived (red diamond)

Within the fugu context all CHAOS hits obtained from the mouse rCNE are shown (green diamonds, in red the one tested)

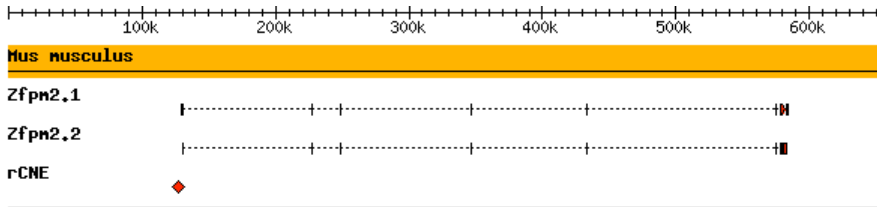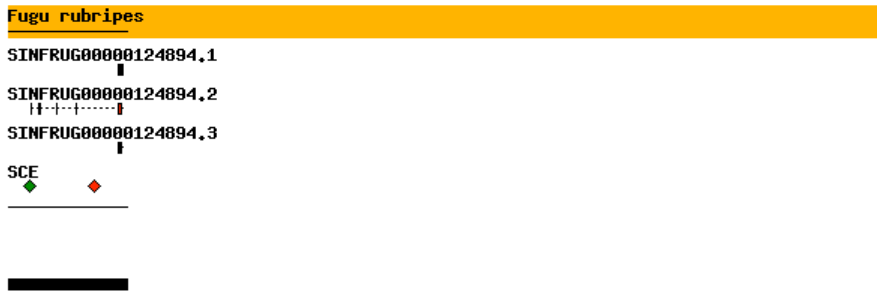

Conserved regions shown within 2000bp context

The mouse context contains:

- rCNEs green boxes, in red the one considered for this test
- SCEs yellow boxes, in red the one considered for this test
- CHAOS hits blue boxes, in red the one considered for this test

The fugu context contains:

- the fragment amplified in this test
- CHAOS hits blue boxes, in red the one considered for this test





AAACGGGGGAATGGCATAAGCTACATAGACACCTAATTATAAAGGATAACCCAGATATG  
AAGGTCTGTGCCCTTTTCATTTTACACACTTTGACTGTGAGCGGTGGGGTCTTTTGTGGT  
TGGTAAACTAGATATTCACCTGGATAGGGAAGATTCAGACGCTCTCACAAGCAGCGTTCT  
GTCAGTCTGCCAGCAGAAATGATTTTAAACTTCACATTAAGCCCTTTGGCAAGTGCT  
GGAATGGCTCTTTGTTAAGGAAGATTTAGATAAAATGTGAGATTC AAGGACAAAATGG  
TTTGTGCTAAATCTCACTGAAAAATCGGAGTCTTTTCTGAAGATGACCGGAGTTTGTCT  
TTCGCCGGACTGTTTAGAGGATANNNNNNNNNNNNNNNNNNNNNNNNNNNNNNNNNTG  
ACCTGTACAGTGTATGCAGCTCGGGTAAATGAGGACTGGATGTGGAGACTTGTGGTAAATC  
AAAGACTGGAGAGGAGGTTGTAGGAAAAGATGGGGGTGAAATAAAGCAGCAATGGAATC  
ATCAGCAGCTGGACGATCGCCACTGAGACCTTCCATAGGTGTTTGTGTGAAAGGGAGC  
CATTCATCAAGACATCAATAAAGCAGCATGGAGCAGATTTATTGTTGTGTTGCGTACCGC  
CGCCCCGCATCATAAATAATGAGTTTGTGCTGCTGTATTAAATTAATAATTAGAATACTG  
ATAATGTGTATGCGCTTTTATTACTGGGGTGAATCAATTTTACAGTCTTATTGAGGCT  
CACAAGTCAACGAAAGTTGGCAGATGAGAGATGGCGTTTGTGTGAGCATCTCTGTGCA  
GTCGGGGCTGTGGGGGTGGGGTGGTACAGAACTGGCCGCTTGTCTCTGCGGATGTA  
TCTCTATAA

---

>amplified\_fugu\_segment  
GCTTGTGACGGAGTGGTCTTTCTTTTGTGGAGAAAAAGAGGAAGCCTAAGAAATG  
ATACATCCGTGGATAAAAACCAATTGGCAACCTCAAAGGGACGGGGGTGATAAGGCAAA  
TCAGCAGCTTGTAGAGAAATAAAGAATCAACTGTTCAATTAACAGGAAACAAAACAG  
GCGATTGAGAAGGAAGCAGACTGCTCAGTGGAGGAGTGAACAGACAAACAGAGC  
CAGAGATATCAGAGGAAAGGATTTGAAAAATAATCAAGGATTTGTGAGGAGAAATAAAG  
GAAGATAGGCACAAATAAGCATTTTTCCACTCTGGGCAAAATTAGGAGGATGGACGA  
CAAAATCAAAACGGGGGAATGGCATAAGCTACATAGACACCTAATTATAAAGGATAACC  
CAGATATGAAGTCTGTGCTTTTTCATTTTACACACTTTGACTGTGAGCGGTGGGGTCT  
TTTGTGTTGTTAACTAGATATTCACCTGGATAGGGAAGATTCAGACGCTCTCACAAGC  
AGCGTCTGT

---

>rCNE\_mouse\_sequence\_610690  
TACTCTGGTTATTTTATCAACCTTTCCTTAAATATCTGACTTTTATTTCTTTCAGCTTT  
TAAACTGAATATTTGAGGTCTGATTTATTTGATATCTTTTGTGCTTTGCATATTTAACCAT  
TCAGATGCCAAAAGAAACACTAAGTGTGTATTTTAAATCCAGGGGACATTCCTTTT  
GGGTGATGAAGTCAAGCAATTTCTATGAAAGATCTATGAAACAGTAACGTACAATAAAT  
CCAAATCTAAGATTTCTGTGCATGCCAATTCACCTATAATGATTTGAGAATGAGGGGGCTA  
AAAAGCT

---

>SCE\_mouse\_sequence\_611063  
TATCAACCTTTCCTTAAATATCTGACTTTTATTCTTTT

---

FUGU HITS IN THE CONTEST OF MAMMALIAN rCNE

CLUSTAL W (1.83) multiple sequence alignment

|                    |                                                             |
|--------------------|-------------------------------------------------------------|
| ENSG00000169946    | TAATGCATCTGGTTATCAATCTTGCCTTGAATTTCTGACTTCTGCTCCTTTTAGCTTT  |
| ENSCAFG00000000678 | CAGTCTGGTTATTTTATCAATCTTGC-TTGAATTCCTGACTTTTGTCTCCTTTAGCTTT |
| ENSMUSG00000022306 | TACTCTGGTTATTTTATCAACCTTTCCTTAAATATCTGACTTTTATTCTTTAGCTTT   |
| SINFRUG00000124894 | --CCTGATTTATTTTCCAATCTTTCCTGATATCTCTGGCTCTGTTTCT-----       |
|                    | * * * * *                                                   |
| ENSG00000169946    | TAAACTAAACATTTAGCTGAGATTTATTTGTTTCTTTTGCATTTGCATATTTAACCACT |
| ENSCAFG00000000678 | TAACTGAATATTTAGCTGAGATTTATTTGTTTCTTTTGCATTTGCATATTTAACCACT  |
| ENSMUSG00000022306 | TAACTGAATATTTAGCTGAGATTTATTTGTTTCTTTTGCATTTGCATATTTAACCACT  |
| SINFRUG00000124894 | -----                                                       |
| ENSG00000169946    | TCAAACCTCAAAGAAACA-----GTTACGATATTTTAAATCCAATGGGCATTCCTTTT  |
| ENSCAFG00000000678 | TCAAATGCCAAAAGAAACACTAAGTGTATGATATTTTAAATCCAATGGGCATTCCTTTT |
| ENSMUSG00000022306 | TCAGATGCCAAAAGAAACACTAAGTGTATTTTAAATCCAAGGGGACATTCCTTTT     |
| SINFRUG00000124894 | -----                                                       |
| ENSG00000169946    | GGGTGACATAAAAATTCAGCCAGTCTGTAAAAGATCTTTAAAACCATTAATGTACAAT  |
| ENSCAFG00000000678 | GGCTGATATAAAAAGTCAAGCAGTCTGTAAAAGAGCTTTAAAACCGTAATGTATAAT   |
| ENSMUSG00000022306 | GGGTGATGTA---AGTCAGCAATTCATGAAA-GATCTATGAAAACAGTAACGTACAAT  |

```

SINFRUG00000124894 -----
ENSG00000169946      ACATCTGATTCTAAG-----CACACCAATTTAACTGTAATGAATTGAAAATGAAGGA
ENSCAFG00000000678  ACATCCAATTCTGAG-----CACACCAATTTAATTGTAATGAATTGAAAATTAAGGA
ENSMUSG000000022306 AAATCCAATTCTAAGATTCTGTGCATGCCAATTCAACTATAATGATTTGAGAATGAGGGG
SINFRUG00000124894 -----

```

```

ENSG00000169946      GGTAATAATCT
ENSCAFG00000000678  GGCAATAATCT
ENSMUSG000000022306 GCTAATAAGCT
SINFRUG00000124894 -----

```

## Fragment Tmeff2\_26014

Representation of conserved regions within their genic context

Within the mouse context is shown the rCNE from which the tested SCE is derived (red diamond)

Within the fugu context all CHAOS hits obtained from the mouse rCNE are shown (green diamonds, in red the one tested)

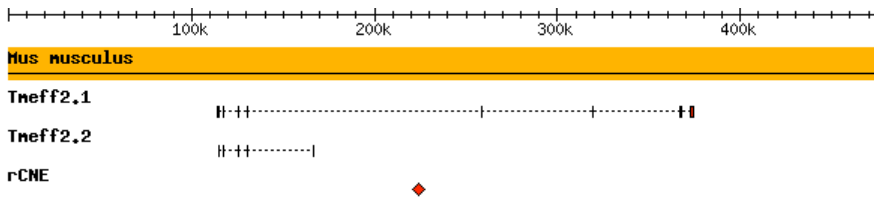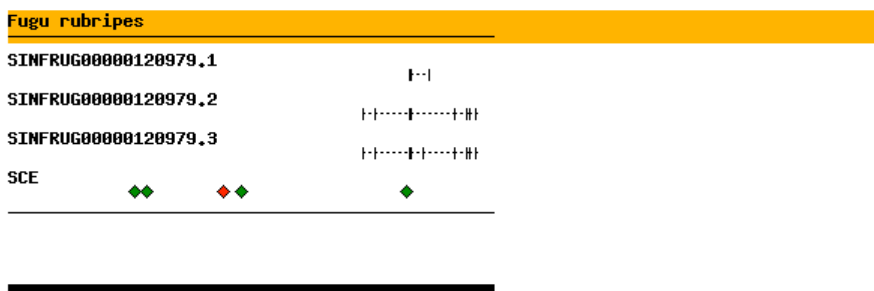

Conserved regions shown within 2000bp context

The mouse context contains:

-rCNEs green boxes, in red the one considered for this test

-SCEs yellow boxes, in red the one considered for this test

-CHAOS hits blue boxes, in red the one considered for this test

The fugu context contains:

-the fragment amplified in this test

-CHAOS hits blue boxes, in red the one considered for this test

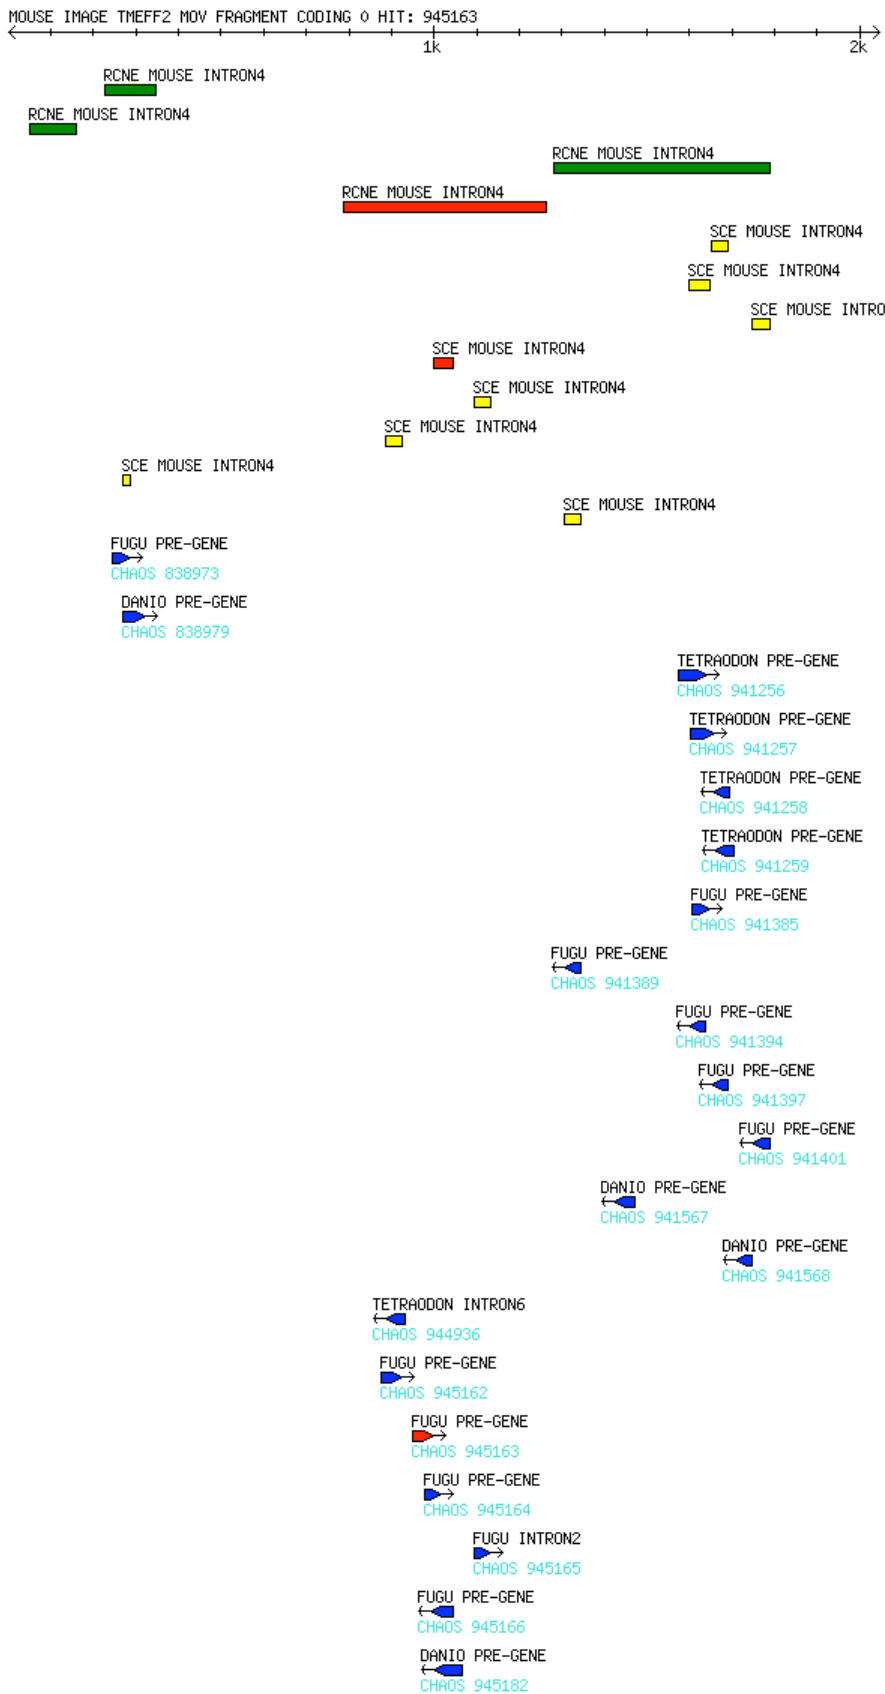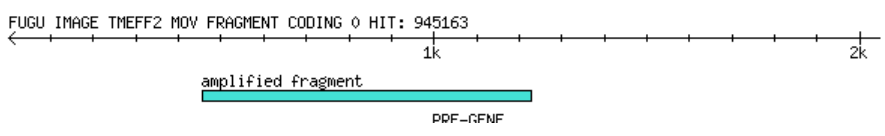

---

## SEQUENCES

---

>fugu\_fragment\_for\_primer\_design\_26014

```
GACAATAAACTTGAAGCTGGGCCCTTTTATATAGCATTTATCTTTAGTTAAACAAATATGG
AAACTATGAGTCACCCGCTAACCTCTGTAAAAGTTTTACAACCTTTTACTATTAATAAAAC
ATGGAGCGGTACACAGGACTCAGACTTCTCTCATTTGAAATATGCAGCAATTTACTAAT
TAGGACAAGGCGTGAGGAAATGCTTCTGGTTCTGGTCTAAACATCAGACTTGGAGAAA
AATGTCGTCTACGGCAGATGCAAAATATTCATCAATTTATCTTTCAAGCTTACGACCGGTA
AAAAGCGTTTGATTTTGAGTTTCTGTGTGTTGACTACAGAGATGAGCAGCTCAACGGGA
CGTCCAAAGAGTTTTCATATAGACGGGACGGATAGAGAAGTCTATGCTGCCAAATCCTCCA
CCTGAAAACAAATCAATGAATAAAATCAAAAATAGCTGTAGGCCAATTAACAAATTCAT
TTGATCATTCATCTGTGTGGAAATTTGGCCACCGCCATTTGTGTCCAACACGGTTTCA
CTGATAATGGCCAGATCATATANNNNNNNNNNNNNNNNNNNNNNNNNNNNNNNNNNNNNNNACTG
GAGAGCGAGAAGGGCCGTAAAATTAATATAAAAACACAGGTTCTGCTTGGCGAGGCACC
CAAGCTTCAACTCTCAAAAGACAACAAGTTAACAGATGTTGTGCATCATGGGAGAACCTC
CCCTCCCAACCCGCCACCCTTGGCCAGTGATGGTAGGCTCCCCCTGGCATTTATTTT
TTATTTGTCATCTCTGAAAACCCACAACACTGTCCGTGCAACTCATTTCTCCCAAAAC
TCATTTCTGCCATCTGTTTTTTCCGAGCAGGTCTGCACCTGCGAGGGGAGAAAATATC
GAGAAAAGGAGGTTNNNNNNNNNNNACAAGTTCATGCTTGACAGGCTCGGTGCTGCATCC
CAGGCTCGGGATGCGTTGAGAAGGAGCTGGCATTTCATGGTAGTTGACAACAACAGAGG
AACATCCAGCAGCTTTAAGTGACAGCTTGGCGGTGCCAGTTTTCATTTGCTAACAGCA
CATCAGCTCCCCATTAAGCTCCTTGTGGAGACGGTGTGAGGTTCTGCAGTGAGGAAATC
AAGGCAGACTCTCACAAAATGACATCAGATAAGGTGATGCGGCCAGCCGAACCGTGACC
ACATTTGGGAGCGAATGTAAGTTTCCATTAATAGCTAGAGACAGTCAACTATCTCCTCAGA
CGTACTCAGTATTCAGGAGCCCAACCACTGGCAATGCATTAAAAATGTTCTGCACAG
ATAAACAAACACTGTGTCAGGACTTTTTTTAAAGACGACAGCTGCAAAATCTCCAATTT
AAACCCATCAATAAAGATGAATACCGTTTTAAATTTATTTCTATCTATGTGCGCTGCAG
ATGGTCTCATAGTTTATGATGAAAGCTGAAAACACCTTCAGATTTAAAGGCTTTTAGATC
TTCCCCAGCCAGAACAAACAAAGACACGTTTGTGACTGTAGGGTTGCTGTGAAATACCCCA
GCAGGGCAGAGCATFCAAACCTTTTGGCGCCACTGTTTTCTCTCTTCATATATCTGCTC
TGCTTAGCTCTCTGACTGTGATTTGCCGCTTTGCCCGTATTTTTCCCTCTCTCTTCAG
GCCGCGCTCCACTTTTTTATTCAAAATCTTGGCGGCTTCCCAAAGGTTTATCTGTGTC
CCACAGCAGTCCCAAACACCTCTCAATCATGTATGCTCAGCTCTGCTCCCAAAGCC
CCACCCAGTGTCAATTCGTTTTCAGGCATCAGTCTTTCAGCTCTGCCGTTCTAGC
CAGCTAGCAGCTATAGCTGTAGGACCCCGAGCCGCTCCCGCTGATTCAGCTATCATA
TTGCCCCGCAATGCAGTTATCTCCGTTTGGACGGAGGAATCCAGTTTTCATATTGGC
CATTAATGTTAACGAGACAGAGGTTTAGAGNNNNNNNNNNNNNNNNNNNNNNNNNNNNNGG
GGGGCACTG
```

---

>amplified\_fugu\_segment

```
TAGCCTGATGGCCATTAACAATTCATTTGATCATTCTCTGTGTGGAATTTTGGCCACC
GCCATTTGTGTTCCAACACGGTTTCACTGATAATGGCCAGATCATATANNNNNNNNNNNN
NNNNNNNNNNNNNNNNNNNNNNNACTGAGAGGCGAAGGGCCGTAAAATTAATATAAA
ACACAGGTTCTGCTTGGCGAGGCACCCAAGCTTCAACTCTCAAAAGACAACAAGTTAACA
GATGTTGTGCATCATGGGAGAACCTCCCTCCCAAACCCGCCACCCTTGGCGAGTGA
TGATAGGCTCCCTGGCATTATTTTTATTGTCATCTCTGAAACACCACAACACTGTGTC
CGTGCAACTCATTTCTTCCCAAACCTCATCTCTGCTATGTTTTTTTCCGAGCAGGTC
GTGCACTCTGCGAGGGAGAAAATATCGAGAAAAGGAGGTTNNNNNNNNNNNACAAGTCA
GCTTGACAGGCTCGGTGCTGCACTCCAGGCTCGGGATGCGTTGAGAAGGAGCTGGCAT
TTTATGGTAGTTGACAACAACAGAGGAACATCCAGCAGCTTTAAGTGACAGCTTGCCTG
TGCCAGTTTTCATTTGCTAACAGCAGCATCAGCTCCCATTAAGCTCTTGTGGAGGAG
GTGTGAGGTTGCACTGAGGAAATTAAGGCAGACTCTCAACAAAATGACATCAGATAAG
GTGATGCGGCCAGCCGACCCGAGCCATTTGGGAGCGAATGTAAGTTTCCA
```

---

>rCNE\_mouse\_sequence\_837802

```
GTCATTCGGAATAGGTGTTTGTATAGAAGCCATTAACAGCCATCAAGGCCTTAAACAGC
TATACATGAGGGAATCTGCCACAAGTCTACCATGATTTGGCTGCTGAGAGCCCTTAAGC
CTTGCAGCAGGTGTGATACTACTTAGAGTCACTTGGGAGCAGGGAGTTGACAACAATG
GCCAAAGACTGGAGCAGAAAAGACAGGCAGCTTGAGTGTGAAAGACAGAAGCTGCCCTCC
CCATCTCCCACTGTAATATTGCCAACCCATTAACAGAGCTTTGGAGTTTCCAGGTTGCT
GAGTGACAGGAGCAGAACCATGAAGGTGGTAATGGCTTGGCAGGTTTAAATGTAGATGAA
TAACCTCTTGTGAGGCAAGAAGTCTGTTTTTATCTATAAAAATTTGTGTGATAACTAA
TGAGACACCTGGGCCATCATACCTGTTATAGTCAATTTCCAGTTTAGCTGTGTATCTA
```

---

>SCE\_mouse\_sequence\_837950  
GAGTGTGAAAGACAGAAGCTGCCCTTCCCATCTCCACCTGTAATA

FUGU HITS IN THE CONTEST OF MAMMALIAN rCNE

CLUSTAL W (1.83) multiple sequence alignment

```
ENSG00000144339      GTCATTCACGAATAGGTGTTTGAGAGGAGCCATTAACAACCATCAAAGCATTAAACAGA
ENSCAFG00000010115  GTCATTCAGGAATAGGTCTTAGAAAAGGGCCATTAACAACCTACCAAAGCATTAACACAGC
ENSMUSG00000026109  GTCATTCGGAATAGGTGTTGATAGAAGCCATTAACAGCCATCAAGGCCCTTAACACAGC
ENSRNOG00000016623  GTCATTCAGAATAGGTATTTGATCAAAGCCATTAACAGCCATCAAGTCCTTAACACAGC
SINFRUG00000120979  -----
```

```
ENSG00000144339      TACACACGGGGGAAG-TACCACAAGTACTGCCATAAGTTGCCGTTGGAGAGAATCGCTAAGC
ENSCAFG00000010115  TACACACATGGGAGCCTACCACAAGTACTGCCATGAGCTGGCTGGGAGGATCCCTAAGC
ENSMUSG00000026109  TATACATGAGGGAATCTGCCACAAGTACTACCATGATTTGGCTGCTGAGAGCCCTTAAGC
ENSRNOG00000016623  TGTACATGAGGGAGTCCACCATAAGTACTACCATGACTTGGCTGCTGAGAGCCCTTAAGT
SINFRUG00000120979  -----
```

```
ENSG00000144339      CTGGCAGCAGACGTGATACTACTTGGAGTAGGAATCTGGGGAGCTGAGAGTTGACAACAA
ENSCAFG00000010115  CTTCAGCAGGTGTGATACTACTTAGAGTAGGAGTCTTGGGAGCTGGGTGTGACAACAT
ENSMUSG00000026109  CTTGCAGCAGGTGTGATACTACTTAGAGT--CAGTCTTGGGAGCAGGAGTTGACAACAA
ENSRNOG00000016623  CTGGCAGCAGGTGTGACACTACTTAGAGT--CAGTCTTGGGATCAGGCAGTTGACAACAA
SINFRUG00000120979  -----GGTAGTTGACAACAA
                               *      *****
```

```
ENSG00000144339      TGTCACAGAGGACTGGAGGTGAAAGAGCAGGCAGCTTGAGTGTGTGAGACAGATGCTGCTT
ENSCAFG00000010115  TGTCACAAAGGACTGGAGGCAAAAGAGCATGCGGCTTGAGTGTGCGAGACAGATGCTACTT
ENSMUSG00000026109  TGGCCAAAG-ACTGGAGCAGAAAAGAACAGGCAGCTTGAGTGTGAAAGACAGAAAGTGCCT
ENSRNOG00000016623  TGTCACAAAGACCAGCAGAAAAGAGCAGCAGCTTGAGTGTGAAAGACAGAAAGTGCCTT
SINFRUG00000120979  CAGA-GGAACATCCCAGCAGCTTTAAGTGACAGCTTG-----
                               * *  **      *      * *****
```

```
ENSG00000144339      -----TCACCATCTCCCACGTGTAATATTTTCAACACATCAGTGGAGCATTAGA
ENSCAFG00000010115  CCTTGTGTCATTCACCATCTCCCACGTGTGATATTC-CAACACATTAACAGAGCATTAGA
ENSMUSG00000026109  -----TCCCCATCTCCCACCTGTAATATTTGCCAACCCATTAACAGAGCTTTGGA
ENSRNOG00000016623  -----TCCCCATCTCCCACATGTAATATTTCCAACACATTAACAGATCTCTGGA
SINFRUG00000120979  -----
```

```
ENSG00000144339      GTTCGTGGCATGCCTAGTGACAGGAATAGAACCATGAAATTG-TAATGTCTTGCCAGTTT
ENSCAFG00000010115  GTTCGTGGCATGCTTAGTGACAGGAATAGAACCATGAAATTGGTAATGTCTTGCCAGTTT
ENSMUSG00000026109  GTTCACGCTGTGCTGAGTGACAGGAGCAGAACCATGAAGGTGGTAATGGCTTGCCAGGTT
ENSRNOG00000016623  GTTCATGTTGTGCTGAGTGACAGGAGCAGAACCATGAAGGTGGTAATGGCTTGCCAGGAT
SINFRUG00000120979  -----
```

```
ENSG00000144339      TAAGATGTAGATGAATAACTTCTTGTTCAGAGCAATGAAGTCTTTCATCCATATAAAAAA
ENSCAFG00000010115  TAAATGTAGATGAATAACTTCTTGTTCAGAGCAATGAAGTCTTTCATCCATATAAAAAA
ENSMUSG00000026109  TAA-ATGTAGATGAATAACTTCTTGTTCAGGCAAAAGAGTCTTTTATCCATATAAAAAA
ENSRNOG00000016623  TAA-ATGTAGATGAATAACTTCTTGTTCAGAGCAAAAGAGTCTTTTATCCATATAAAAAA
SINFRUG00000120979  -----
```

```
ENSG00000144339      TCCACATATAACTAATGAGACTCTTGGCCATCATACCTGCTCTGTTCAATGTCTTACAC
ENSCAFG00000010115  TTTGTGTATAACTAATGAGACTCTTGGCCATCATACCTGTTCAATTCATTTCTTACAC
ENSMUSG00000026109  TCTGTGCATAACTAATGAGACACTTGGCCATCATACCTGTTATAGTCAATTTCC-----
ENSRNOG00000016623  TCTGTGCATAACTAATGAGACACTTGGCCATCATACCTGCTCTAGTCAATTTCC-----
SINFRUG00000120979  -----
```

```
ENSG00000144339      TGATTTGGCTGTTCAACTA
ENSCAFG00000010115  TAGTTTGGCTGTTCAACTA
ENSMUSG00000026109  -AGTTTAGCTGTATCTA
ENSRNOG00000016623  -AGTTTAGCTGCGTATCTA
SINFRUG00000120979  -----
```

# Fragment Tmeff2\_26015

Representation of conserved regions within their genic context

Within the mouse context is shown the rCNE from which the tested SCE is derived (red diamond)

Within the fugu context all CHAOS hits obtained from the mouse rCNE are shown (green diamonds, in red the one tested)

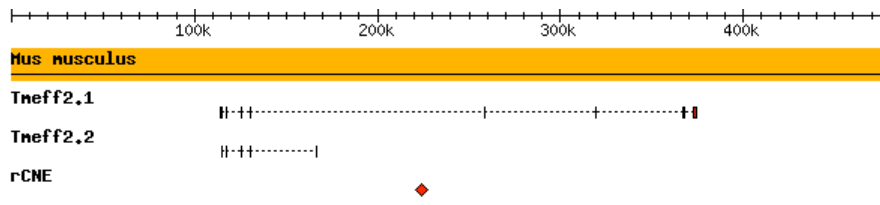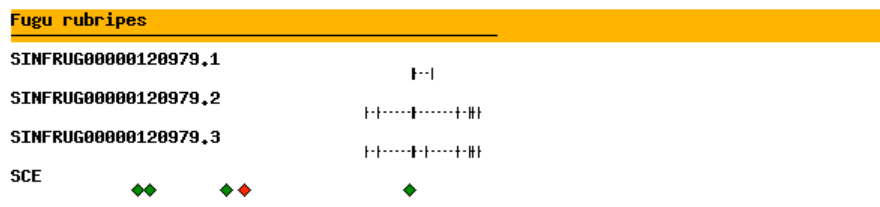

Conserved regions shown within 2000bp context

The mouse context contains:

- rCNEs green boxes, in red the one considered for this test
- SCEs yellow boxes, in red the one considered for this test
- CHAOS hits blue boxes, in red the one considered for this test

The fugu context contains:

- the fragment amplified in this test
- CHAOS hits blue boxes, in red the one considered for this test



MOUSE IMAGE TMEFF2 MOV FRAGMENT CODING 0 HIT: 945164  
1k 2k

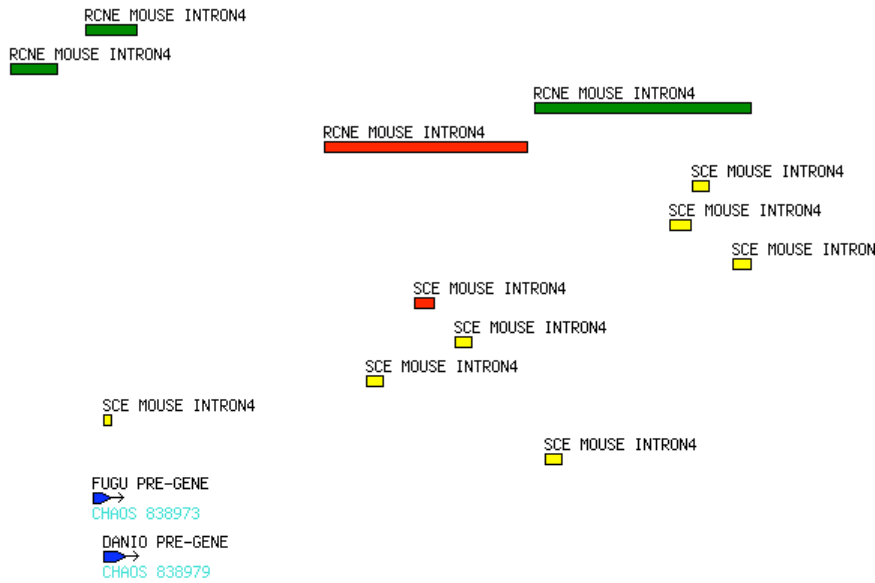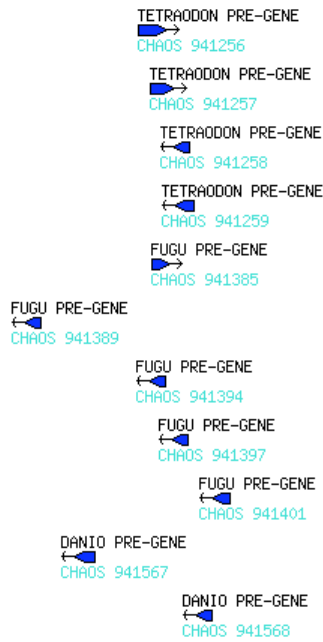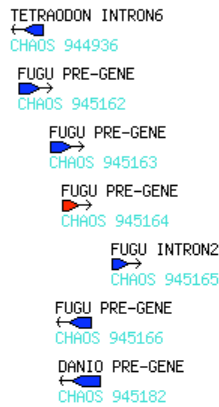

FUGU IMAGE TMEFF2 MOV FRAGMENT CODING 0 HIT: 945164  
1k 2k

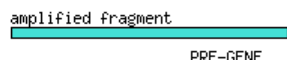

---

## SEQUENCES

---

>fugu\_fragment\_for\_primer\_design\_26015

```
GATTTGTCAACACACTCGGCCGGGATAATGACTGTTCTCTGGTGGGTATAAATAATGAC
TTCTGATTTATTCACGACGACATAAATCATCCGAAGGCTTATCCGGATGCACAGCCTTC
CGCACACAAGGGAGAGGCTCTTGTATGGAGAAATCTCAATTTGTTCTCTTATTTTCAG
TATGAGTAAATCTGATTAGTTGATTTATGAAGTTTCTCAGTCAAATATTTGCTATATAT
TTGTTTGGAGATGTTAATATATGTTTGGAAATAAAAAATAAAAGGCTGCTCGAGATTT
GGATACACTGAAAAATAGACTGTGTATTTCTCTTATTTATTTTATTTGATTGACGACTGCA
TAATCAATACGATGTGCTGTGTGTGTAATAATAGGGGCTTGTCTTGTATGGACGTCAAA
GCAACCCAGCAGTGGTGTATGGATCAGAGACGATGGCGGCTCAACAAACAAACAGACAA
CATAAAGTTTCAAGGCGTGCAGGAGGAGGACAGACTAAAAGTGCCTATTCAAGAGTGAT
GGAGATGTCAGGATTAGGGTGGAGGACATCACGGAGATAGCACAGGCCAGATGAATCGG
AGATGGCAGACACAGATGTTGTTGGACATGTGCAAAAGTTGGATAGTGGGAATGCTGCTA
GAAGGACCGTAGCTGCCACTGGTTTATGTATGTTGGTGAATAAGGACACGCTGATGTTCT
CATGCAGATGGGTGCTGATGTCAGTCTTAGGAATGGATGGATGTTAAAACCCATTTGTC
ACTGGAGCTCGAAGGTAATTTGTTGTGACACTGATGCATCCTTTAGTGTATTTTTCACA
CCCCAGTCTTCACTGCTACTGTTTGTGCTTATTTTATTAATGGGCACTTCCCTGTTGCA
AAAAATGGTGCCAAATCCTACTTTTATTAACCTGTAACCTAAGCAAGGCTTAGAAATTA
GTTAAAATTAATCATATGAAGTAACTTTTCTGATGCTTTAGGGTATATGGTATATGCAC
AGTGTGTGTAAGAAGAACTGACTGCTAAATATAGGTCCCTTTAAAAGGCTGCAGGCAT
GTCTGAAATCTTCTGACCAAAAACAAACTCTTCATTTCCCTACCAGGAATACAAATGTTGC
ACCGTTGATGGAGGAATTCAGTCAATTAGAAATATGGTAAATTTGATCAGCATTTTAGATC
ATTGCTCACTTTTATCGCTCCCTGAATCTACAAATAAGTCTTGCAATTTGCTAATGT
CAAGGAGTGTGCCGCCNNNNNNNNNNNNNNNNNNNNNNNNNNNNNNNNNNNNNNNNNTA
TACATTTACATCAGCATAATCATCATTTACACTACCTACAGGCACCAAACTCTCCCAAC
CATACATACGTTAATTAAGAGGGGAGTGAACACACAGCATCTCGTTTGTGCTGGGAAT
AAAACCTGGGAAGCGCTGTGTGCTGCTGCTGCTGCTGCTGCTGCTGCTGCTGCTGCTGCT
AAATCTAAATAAATAAATTAATTAATTAATTAATTAATTAATTAATTAATTAATTAATTA
TTACAGTTAATCAAGAGCAACAGAGGNNNNNNNNNNNNNNNNNNNNNNNNNNNNNNNN
NAAGTACATGTGTTTGGCGCATCAGCTCCAGCTGCCCACTGCTTACAACTGTCAGCA
GCCATCATGGAGAGGGCCCTCATTTGTTGTAAGGACAAAGGCCACCGTGCACCAAGTGG
GAGATAAGGTGATTTATGAGCAGCTGTCAGAGCAGTGGCAGGTAAACATGCACNNNNNN
NNNNNNNNNNNNNNNNNNNNNTGGTTTGGGGAGTGTATCCACCACCTTCTCCAAATG
GAGGCATGGTATCTAATTAACACTATCACTACATCTGGATTGCTGGGATTTGAAATTTG
GTCTGAAAGTCAAAACCTTTTGGGGCAAGAGCTGACGTGTGGCTGTGGAGTCAAAGA
CCAATACAGAGGCCAATGAGCGGAATCCTCAGGGCAAACTGGGAAAAAGGCAAGAC
```

---

>amplified\_fugu\_segment

```
AGATAGCACAGGCCAGATGAATCGGAGATGGCAGACACAGATGTTGTGGACATGTGCAA
AAGTTGGATAGTGGGAATGCTGCTAGAAGGACGGTAGCTGTCCACTGGTTTATGTATGTG
GTGAATAAGGACACGCTGATGTTCTCATGCAGATGGGTGCTGATGTCAGTCTTAGGAATG
GATGATGTTAAACTCCATTTGTCAGTGGAGCTCGAAGGTAATTTGTTGACATGAT
GCATCTTTAGTGTATTTTTCACACCCAGTCTTCACTGGTACTGGTTTGTGCTTATTT
TATTAATGGGCACTTCCCTGTTGCAAAAAATGGTGCCAACTCTACTTTTATTAACCTGTA
ACCTAAGCAAGCCTTAGAAATTAAGTAAAAATTAATCATATGAAGTAACTTTTCTGAT
GCTTTAGGGTATATGGTATATGCACAGTGTGTGTAAGAAGAACTGACTGCTAATATA
GGTCCCTTTAAAGGCTGCAGGCATGTTCTGAAGTCTTCTGACCAAAAACAACTCTTCAT
TTCTACCAGGAATACAAATGTTGCACCGTTGATGGAGAAATCAGTCAATTAGAAATAT
GGTAATTTGATCAGCATTTTAGATCATTTGCTCATCTTTTATCGCTCCT
```

---

>rCNE\_mouse\_sequence\_837802

```
GTCAATTCGGAAATAGGTGTTGATAGAAGCCATTAACAGCCATCAAGGCCTTAAACAGC
TATACATGAGGGAATCTGCCACAAGTGTACCATGATTTGGCTGCTGAGAGCCCTTAAAGC
CTTGCAGAGGTGTGATACTACTTAGAGTCACTTGGGAGCAGGGAGTTGACAACAATG
GCCAAAGACTGGAGCAGAAGAACAGGCAGCTTGAAGTGTGAAAGCAGAAGCTGCCCTTCC
CCATCTCCACCCTGTAATATGCGCAACCCATTAACAGAGCTTTGGAGTTCACGGTGTGCT
GAGTGACAGGAGCAGAACCATGAAGTGGTAATGGCTTGGCAGGTTTAAATGTAGATGAA
TAACCTCTTGTGAGGCAAGAAGTCTGTTTTATCTATAAAAAATTTGTGCATAACTAA
TGAGACACTGGCCATCATACCTGTTATAGTCAATTTCCAGTTTAGCTGTGTATCTA
```

---

>SCE\_mouse\_sequence\_837950  
GAGTGTGAAAGACAGAAGCTGCCATCCCCATCTCCACCTGTAATA

---

FUGU HITS IN THE CONTEST OF MAMMALIAN rCNE

CLUSTAL W (1.83) multiple sequence alignment

```
ENSG00000144339      GTCATTCAGGAATAGGTGTTTGAGAGGAGCCATTAACAACCATCAAAGCATTAACAGA
ENSCAFG00000010115  GTCATTCAGGAATAGGTCTTAGAAAAGGGCCATTAACAACATACCAAAGCATTAACAGC
ENSRNOG00000016623  GTCATTCAGGAATAGGTATTTGATCAAAGCCATTAACAAGCCATCAAGTCCCTAAACAGC
ENSMUSG00000026109  GTCATTCAGGAATAGGTGTTTGATAGAAGCCATTAACAAGCCATCAAGGCTTAACAGC
SINFRUG00000120979  -----
```

```
ENSG00000144339      TACACACGGGGGAAG-TACCACAAGTACTGCCATAAGTTGCCGAGAGAAATCGCTAAGC
ENSCAFG00000010115  TACACACATGGGAGCCTACCACAAGTACTGCCATGAGCTGGCTGGAGGATCCCTAAGC
ENSRNOG00000016623  TGATACATGAGGGAGTCCACCATAAGTGTCTACCATGACTTGGCTGTGAGAGCCCTAAGT
ENSMUSG00000026109  TATACATGAGGGAATCTGCCACAAGTGTACCATGATTTGGCTGTGAGAGCCCTAAGC
SINFRUG00000120979  -----
```

```
ENSG00000144339      CTGGCAGCAGACGTGATACTACTTGGAGTAGGAATCTGGGGAGCTGAGAGTTGACAACAA
ENSCAFG00000010115  CTGGCAGCAGGTGTGATACTACTTAGAGTAGGAGTCTTGGGAGCTGGGTGTGACAACAT
ENSRNOG00000016623  CTGGCAGCAGGTGTGACACTACTTAGAGT--CAGTCTTGGGATCAGGCAGTTGACAACAA
ENSMUSG00000026109  CTGGCAGCAGGTGTGATACTACTTAGAGT--CAGTCTTGGGAGCAGGGAGTTGACAACAA
SINFRUG00000120979  -----
```

```
ENSG00000144339      TGTCACAGGACTGGAGGTGAAAGAGCAGGCAGCTTGAGTGTGTGAGACAGATGCTGCTT
ENSCAFG00000010115  TGTCACAAAGACTGGAGGCAAAAGAGCATGCGGCTTGAGTGTGCGAGACAGATGCTACTT
ENSRNOG00000016623  TGTCACAAAGACCGGAGCAGAAAGAGCAGACAGCTTGAGTGTGAAAGACAGAAAGCTGCTT
ENSMUSG00000026109  TGCCAAA--GACTGGAGCAGAAAGAACAGGCAGCTTGAGTGTGAAAGACAGAAAGCTGCC
SINFRUG00000120979  -----
                        * * * * * * * * * * * * * * * *
                        * * * * * * * * * * * * * * * *
```

```
ENSG00000144339      -----TCACCATCTCCCAGTGTAAATATTTTCAACACATCAGTGGAGCATTAGA
ENSCAFG00000010115  CCTTGTGCATTCACCATCTCCCAGTGTGATATTC--CAACACATTAACAGAGCATTAGA
ENSRNOG00000016623  -----TCCCCATCTCCCACATGTAATATTTTCAACACATTAACAGATCTCTGGA
ENSMUSG00000026109  -----TCCCCATCTCCCACCTGTAATATTTGCCAACCCATTAACAGAGCTTTGGA
SINFRUG00000120979  -----
```

```
ENSG00000144339      GTTCGTGCATGCCTAGTGACAGGAATAGAACCATGAAATTG--TAATGCTTTGCCAGTTT
ENSCAFG00000010115  GTTCGTGCATGCTTAGTGACAGGAATAGAACCATGAAATTGGTAATGCTTTGCCAGTTT
ENSRNOG00000016623  GTTCATGCTGTGCTGAGTGACAGGAGCAGAACATGAAGTGGTAATGGCTTTGCCAGGAT
ENSMUSG00000026109  GTTCACGGTGTGCTGAGTGACAGGAGCAGAACATGAAGTGGTAATGGCTTTGCCAGGTT
SINFRUG00000120979  -----
```

```
ENSG00000144339      TAAGATGTAGATGAATAACTTCTTGTGACAGCAATGAAGTCTTCTTATCCATATAAAAAA
ENSCAFG00000010115  TAAATGTAGATGAATAACTTCTTGTGACAGCAATGAAGTCTTCTTATCCATATAAAAAA
ENSRNOG00000016623  TAA-ATGTAGATGAATAACTTCTTGTGACAGCAAAAGAGTCAATTTTAGCCTATAAAAAA
ENSMUSG00000026109  TAA-ATGTAGATGAATAACTTCTTGTGACAGGCAAAAGAGTCTTCTTATCCATATAAAAAA
SINFRUG00000120979  -----
```

```
ENSG00000144339      TCCACATATAACTAATGAGACTCTTGGCCATCATACCTGCTCTGTTCAATGCTCTTACAC
ENSCAFG00000010115  TTTGTGTATAACTAATGAGACTCTTGGCCATCATACCTGTTCAATTCATTTCTTACAC
ENSRNOG00000016623  TCTGTGCATAACTAATGAGACACCTGGCCATCATACCTGCTCTAGTCAATTTCC-----
ENSMUSG00000026109  TCTGTGCATAACTAATGAGACACCTGGCCATCATACCTGTTATAGTCAATTTCC-----
SINFRUG00000120979  -----
```

```
ENSG00000144339      TGATTTGGCTGTTCAACTA
ENSCAFG00000010115  TAGTTTGGCTGTTCAACTA
ENSRNOG00000016623  -AGTTTAGCTGCGTATCTA
ENSMUSG00000026109  -AGTTTAGCTGTTATCTA
SINFRUG00000120979  -----
```

---

# Fragment Tmeff2\_26016

Representation of conserved regions within their genic context

Within the mouse context is shown the rCNE from which the tested SCE is derived (red diamond)

Within the fugu context all CHAOS hits obtained from the mouse rCNE are shown (green diamonds, in red the one tested)

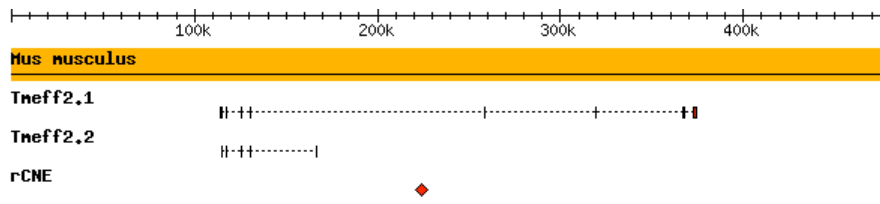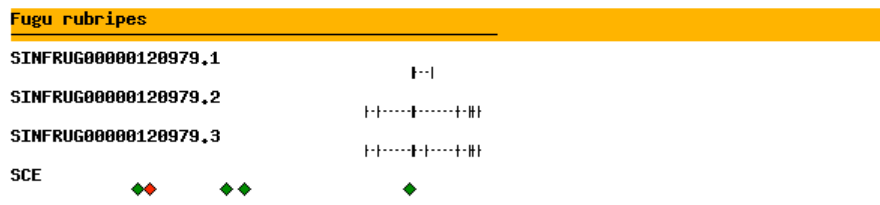

Conserved regions shown within 2000bp context

The mouse context contains:

- rCNEs green boxes, in red the one considered for this test
- SCEs yellow boxes, in red the one considered for this test
- CHAOS hits blue boxes, in red the one considered for this test

The fugu context contains:

- the fragment amplified in this test
- CHAOS hits blue boxes, in red the one considered for this test

MOUSE IMAGE TMEFF2 MRE FRAGMENT CODING 0 HIT: 945166  
1k 2k

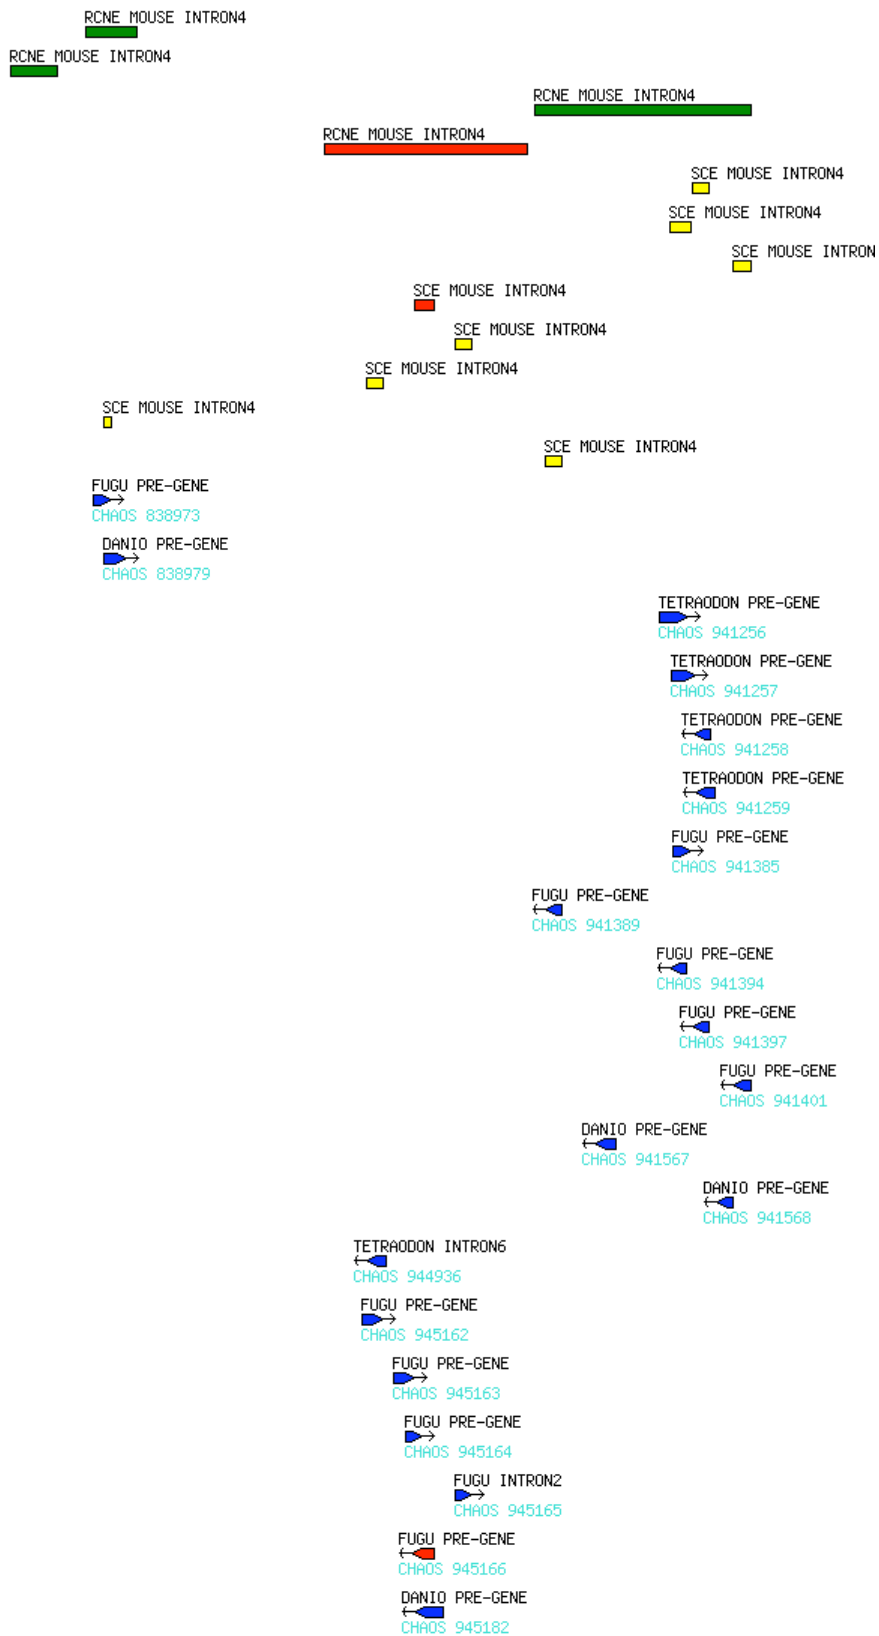

FUGU IMAGE TMEFF2 MRE FRAGMENT CODING 0 HIT: 945166  
1k 2k

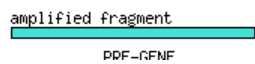

---

## SEQUENCES

---

>fugu\_fragment\_for\_primer\_design\_26016

```
ATAACTATTAGTTTTAGTTATTTCTTCTATTGGGGGCTTGTTCCTTATATGTGGG
ATCGGATCATAAACGTTGGAAGGATTCCAAACCTGTGTAAGTTGAGTTCTCACCGCGCTCT
ACGATACCTATGGTAAAGACTCCCATGTAAAGCCAATAAAGCACAGGTGAGTGGCTG
GGAAGAGGGCTTCAAACATTGTCAGGCAGCTGGCATAAAATCATGAGCAATCTGCTTT
TACTGGTGGCAGCCCTCCTCAATAAGGCTGGGAAACGCTCCCGGGCTTCTAGGGGGC
TGCCCTCGTGGTGGAGGCTATAAACTAACACCGACGAGACTGAATCCTGAAGAGCGCGAG
CGTTGACCTGCTCAGACGGAGGCTTCCCTCCCTGTACCCAGTGGCTCTGGAACCTTG
TCTCGGGCAATTAATCTGCTTTGAGACAGGTGTCTAAGCCTGCATGTCGAGCGGGGATC
TATTTCTCTCTGCCCTCCAGCTGGCTCCTGAAGCACATCCACCGGGTGTACAGCGCTGTG
ATTACCTGCTGTCCCGCCAGTCAGCCTTAGCTGAACCAATTGCTTTTGGCTTTGTAAGT
ACTGGTAAACATCTGAAACCAATGCGGCTTAGGAACGGCGCGCTTGAAGACACGNNNN
NNNNNNNNNNNNNNNNNNNNNACCTATTTCATGCAAACTGCATTTAGCAAATTTATAC
TAATAAGACTGACGATCATTTTGATTTTTCTTTGGGGAGAAACAATGTAGGCTAACACC
TGAAGATCTCATAGCTGCTTTGCCCTTGAGCAGAATAAGGAGAGAGCAGGTAATCGGCCA
AACGTCATAATCACTTCAGATTTAGCACGTTATTCGGGGTACACTTGTAAATAAACTC
AGTGATTCGGCTGCTTTTCAATCCNNNNNNNNNAGTAGTAATGGGTATTTATCCTGCATA
CTGATGTTAGCAGCAAACCGGCTGTCAACACCCGGATGTGTTCCGGTTGGGAAGTTGCT
AAAATGACGATTTCCCTTAAACTCAAGCTGCAGTTGGTCAGCACACGACCAAAGCAGGA
GAGGTGACTGGTGGCTCCGGGGTGGCTGACCCACGACGGGACGAGTACGCTGCTCCG
ATCGGCTGACGGCTCCCGAGCTCGTGAAGGACAGGATGCTTCCCTGTATCAGCGTCT
CTCTTCTTCTGCTCCGCTCCTCAGTGGTGTCCAGCCTTGAAAAAGGCTGAATATTT
TAACGAAGTATTTTAAAGTATTCCTCCGCTTTTGGCATCTGGATCATGGAGGAGGGT
TTCTCGAGTTCTTTCGCTGAAGNNNNNNNNNNNNCAATCGCATTTCTTTAAATGTAAA
AGCATCTCCGATCAATAAATCAACGCATCTTTTCTAAATAACTCATGAGTCTGCGAACT
TGACGGCCCCCTCTCTACTCAGAATAAGCGATTCCTTCAGTGTGACAGCTGGATCTCA
AAGCAAAAGAAAGAGATTTTAGGCCCTGGGGACCGGAATCTTCAAAAGTCCGGGGGAG
GGACGGGTAGATCTGTGGACCGCTGTCTTCTCACTGGCAGGCTGCAGTAACAGAAAGGATG
ACGGATACATCTCCTAATGTGTTCTGACCTTTGCCAGGAAGTTCTTCTAATGTTGTCAA
AAACTACAGATGAAGACGCTTFCAGAAAGGAAAAAAGAGCGTTTAAATTTGATGCTCG
AGTTTCACTTTGGCGAGCCGAGAGGAATCTGGGAAAGAAAGCTGCCACTGAAGTGGATGT
GTCGCTTTCTCTCTGACCGTATCAGCTTGTCCGAAAGAGGAGACGACAGTGGAGC
GTCAGCGCTTTAATCTGAGGCTGGTAACGATGAAGCTTGGCCACGACACGCTCACGCTCC
CTTTTCTGTCCATCTGGGCCATTTTCTTCTGATTAGCCCTTTTCTTTTGGTGGCTC
TCAGTCTCTGTCTATCAATTTCTTGTGGATCCTTGTTTTTCTTTTGGGTTGTCTGGATTT
GCATCAGAAAAAT
```

---

>amplified\_fugu\_segment

```
TGGGGAGAAACAATGTAGGCTAACACCTGAAGATCTCATAGCTGCTTTGCCCTTGAGCAGA
ATAAGGAGAGAGCAGGTAATCGGCCCAACGTCATAATCACTTCAGTATTTAGCACGTTA
TTCGGCTACACTGTGATAAATAAACTCAGTGTATCCGCTGCTTTTCAATCCNNNNNNNNA
GTAGTAATTTGGTATTTATCTGCATACTGATGTTAGCAGCAAACCGGCTGTCAACACC
CGGATGTGTTCCGGTTGGGAAGTTGCTAAAATGACGATTTCCCTTAAACTCAAGCTGCA
GTTGTCAGCACACGACCAAAGCAGGAGGTTGACTGGTGGCTCCGGGGTGGCTGACCC
AGCAGCGACCAAGCTACGCTGCTCCGATCGGCTGCAGGCTCCCGAGCTCGTGAAGGA
CAGGATGCTTCCCTGATCAGCGTCTCTTCTTCTTCTGCTCCGCTCCTCAGTGGTGT
CCAGCCTCTGAAAAGGCTGAATATTTAACGAAGTATTTTAAAGTATTTCTCCGCTTTT
TTGGCATCTGGATCATGGAGGAGGGTTCT
```

---

>rCNE\_mouse\_sequence\_837802

```
GTCATTCGGAATAGGTGTTGATAGAAGCCATTAACAGCCATCAAGGCCTTAAACAGC
TATACATGAGGAATCTGCCACAAGTGTACCATGATTTGGCTGTGAGAGCCCTTAAAGC
CTTGACAGAGGTGTGATACTACTTAGAGTCACTTGGGAGCAGGGAGTTGACAAACAATG
GCCAAAGACTGGAGCAGAAGAACAGCAGCTTGAGTGTGAAAGACAGAAGCTGCCCTTCC
CCATCTCCACCCTGTAATATGCGCAACCCATTAACAGAGCTTTGGAGTTCACGGTGTGCT
GAGTGACAGGAGCAGAACCATGAAGTGGTAAATGGCTTGGCAGGTTTAAATGTAGATGAA
TAACCTCTTGTGAGGCAAGAAGTCTGTTTTATCTATAAAAAATCTGTGCATAACTAA
TGAGACACTGGGCCATCATACTGTTATAGTCAATTTCCAGTTTAGCTGTGTATCTA
```

---

>SCE\_mouse\_sequence\_837950  
GAGTGTGAAAGACAGAAGCTGCCCTTCCCATCTCCACCTGTAATA

FUGU HITS IN THE CONTEST OF MAMMALIAN rCNE

CLUSTAL W (1.83) multiple sequence alignment

```
ENSMUSG00000026109      GTCATTCGGAATAGGTGTTTGTATAGAAGCCATTAACAAGCCATCAAGGCCTTAAACAGC
ENSRNOG00000016623      GTCATTCAGAAATAGGTATTTGATCAAAGCCATTAACAAGCCATCAAGTCCTTAAACAGC
ENSCAFG00000010115      GTCATTCAGGAATAGGTCTTAGAAAGGGGCCATTAACAACACTACCAAGCATTAACAGC
ENSG00000144339         GTCATTCACGAATAGGTGTTTGTAGAGGAGCCATTAACAACCATCAAGCATTAACAGA
SINFRUG00000120979      -----
```

```
ENSMUSG00000026109      TATACATGAGGGAATCTGCCACAAGTGTACTACCATGATTTGGCTGCTGAGAGCCCTTAAGC
ENSRNOG00000016623      TGTACATGAGGGAGTCCACCATAAGTGTACTACCATGACTTGGCTGCTGAGAGCCCTTAAGT
ENSCAFG00000010115      TACACACATGGGAGCCTACCACAAGTACTGCCATGAGCTGGCTGTGGAGGATCCCTAAGC
ENSG00000144339         TACACACGGGGGAAG-TACCACAAGTACTGCCATAAGTTGCCCTGGAGAGAATCGCTAAGC
SINFRUG00000120979      -----
```

```
ENSMUSG00000026109      CTTGCAGCAGGTGTGATACTACTTAGAGTC--AGTCTTGGGAGCAGGGAGTTGACAACAA
ENSRNOG00000016623      CTGGCAGCAGGTGTGACACTACTTAGAGTC--AGTCTTGGGATCAGGCAGTTGACAACAA
ENSCAFG00000010115      CTTGCAGCAGGTGTGATACTACTTAGAGTAGGAGTCTTGGGAGCTGGGTGTGACAACAT
ENSG00000144339         CTGGCAGCAGCAGTGTACTACTTGGAGTAGGAATCTGGGAGCTGAGAGTTGACAACAA
SINFRUG00000120979      -----
```

```
ENSMUSG00000026109      TGGCCAAA-GACTGGAGCAGAAAGAACAGGCAGCTTGAGTGTGAAAGACAGAAGCTGCC
ENSRNOG00000016623      TGTCAAAAGACCCGGAGCAGAAAGAGCAGCAGCTTGAGTGTGAAAGACAGAAGCTGCTT
ENSCAFG00000010115      TGTCAAAAGGACTGGAGGCAAAAGAGCATGCGGCTTGAGTGTGCGAGACAGATGCTACTT
ENSG00000144339         TGTCAGAGGACTGGAGGTGAAAGAGCAGGCAGCTTGAGTGTGTGAGACAGATGCTGCTT
SINFRUG00000120979      -----TGCAGCTTGAGTTTAAAGGGGAATCGTCATTT
                                * * * * *
                                * * * * *
```

```
ENSMUSG00000026109      TCC-----CCATCTCCCACCTGTAATATGCAACCCATTAACAGAGCTTTGGA
ENSRNOG00000016623      TCC-----CCATCTCCCACATGTAATATTTCCAACACATTAACAGATCTCTGGA
ENSCAFG00000010115      CCTTGTGTCATTCACCATCTCCCACGTGTGATATT-CCAACACATTAACAGAGCATTAGA
ENSG00000144339         TCA-----CCATCTCCCACGTGTAATATTTTCAACACATCAGTGGAGCATTAGA
SINFRUG00000120979      TAG-----CAACTTCCCACCGGAACA-----
                                * * * * *
                                * * * * *
```

```
ENSMUSG00000026109      GTTCACGGTGTGCTGAGTGACAGGAGCAGAACCATGAAGGTGGTAATGGCTTGCCAGGTT
ENSRNOG00000016623      GTTCATGGTGTGCTGAGTGACAGGAGCAGAACCATGAAGGTGGTAATGGCTTGCCAGGAT
ENSCAFG00000010115      GTTCCTGGCATGCTTAGTGACAGGAATAGAACCATGAAATGGTAATGCTTGCCAGTTT
ENSG00000144339         GTTCGTGGCATGCTTAGTGACAGGAATAGAACCATGAAATGG- TAATGCTTGCCAGTTT
SINFRUG00000120979      -----
```

```
ENSMUSG00000026109      TAAA-TGTAGATGAATAAACCCTCTTGTCTAGGGCAAAGAGTCGTTTTTATCCATATAAAAA
ENSRNOG00000016623      TAAA-TGTAGATGAATAAACCCTCTTGTCTAGAGCAAAGAGTCATTTTTAGCCATATAAAAA
ENSCAFG00000010115      TAAAAATGTAGATGAATAAACCCTCTTGTCTAGAGCAATGAAGTCCTTTCATCCATATAAAAA
ENSG00000144339         TAAGATGTAGATGAATAAACCCTCTTGTCTAGAGCAATGAAGTCCTTTCATCCATATAAAAA
SINFRUG00000120979      -----
```

```
ENSMUSG00000026109      TCTGTGCATAACTAATGAGACACCTGGGCCATCATACCTGTTTATAGTCAATTTCC-----
ENSRNOG00000016623      TCTGTGCATAACTAATGAGACACCTGGGCCATCATACCTGCTCTAGTCAATTTCC-----
ENSCAFG00000010115      TTTGTGTATAACTAATGAGACTCTTGGCCATCATACCTGTTCAATTTCAATTTCTTACAC
ENSG00000144339         TCCACATATAACTAATGAGACTCTTGGGCCATCATACCTGCTCTGTTCAATGCTTACAC
SINFRUG00000120979      -----
```

```
ENSMUSG00000026109      -AGTTTAGCTGTGTATCTA
ENSRNOG00000016623      -AGTTTAGCTGCGTATCTA
ENSCAFG00000010115      TAGTTTGGCTGTTCAACTA
ENSG00000144339         TGATTTGGCTGTTCAACTA
SINFRUG00000120979      -----
```

# Fragment Pax6\_15696

Representation of conserved regions within their genic context

Within the mouse context is shown the rCNE from which the tested SCE is derived (red diamond)

Within the fugu context all CHAOS hits obtained from the mouse rCNE are shown (green diamonds, in red the one tested)

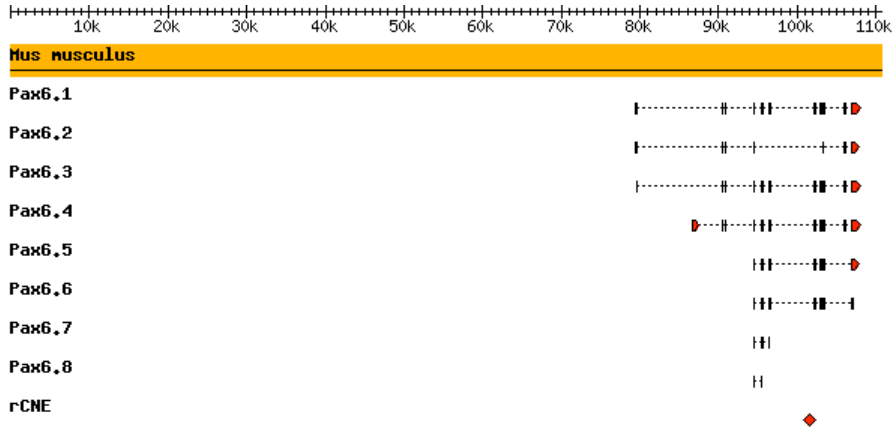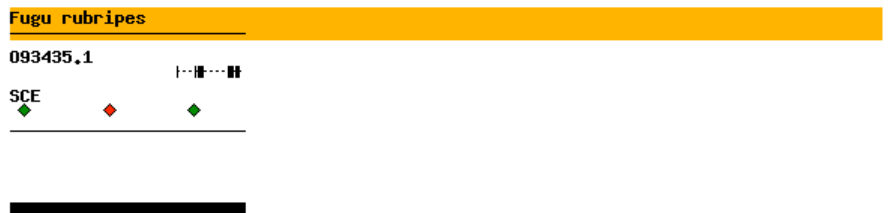

Conserved regions shown within 2000bp context

The mouse context contains:

- rCNEs green boxes, in red the one considered for this test
- SCEs yellow boxes, in red the one considered for this test
- CHAOS hits blue boxes, in red the one considered for this test

The fugu context contains:

- the fragment amplified in this test
- CHAOS hits blue boxes, in red the one considered for this test



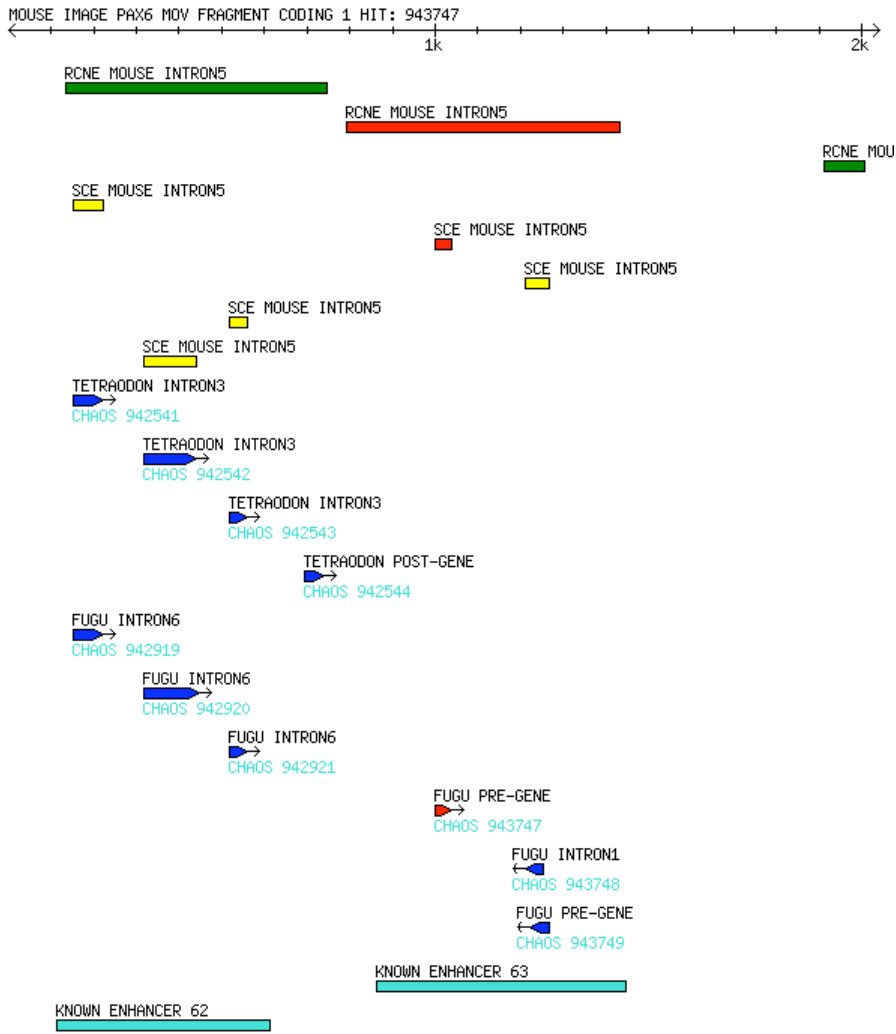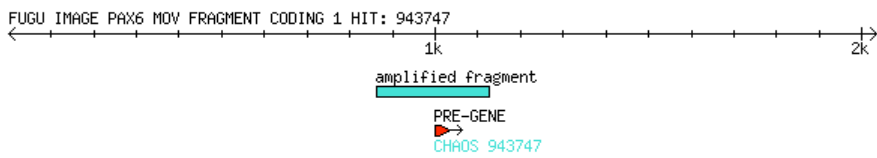

## SEQUENCES

```
>fugu_fragment_for_primer_design_15696
ATCTGCTTCTGGAGAGCGCGGCTGTGTGGGAAGGGAAAGGAGCACCTGGCTCGACCGCT
GTATACCCATCTCGTTTTATTGACAGGCTGATAAGCAGGGACCGAGCCGTGCGGTTTTCCA
GCGCGCATGTCGAGCACCCCTGCTGCGTTGCACAGTATCGAGACCTCTTAATGGCTGCGCC
TCCAAATAATGGCCGAACACAGCCAGTCGTGACTGGCCCGTACCTGCGCCGTACGGTG
TCTTCTGAGAGACAGGCAGGCGCGCGGTTGCCCATTTACTCACCGTCTTGTTCAAATT
GACACAAACATCAGAGGTCGTGAAACAGCATTTGAGGCTTTTAGCCGCGCTTGTGTA AAAA
GGAAACTGAAGCTCCATTACGAGTCCGATAGCAACTTTATAGGGCTGTAGACATAAAAA
```

GGGGATTTTAGCTAAAACAGTGGCATTATTTATAACATCAITTTATGTTTATGGTGGTTCA  
GCCTCGAAACACAAACCACGGCGGGATGTAGCTGCACATCTGACCCCAACCCGCTGCTGGA  
GGTTTCAGATAAGTCACAAGGTTTACCTGCACAACACCTGTTGCAGGTTACGGAAAAAC  
GACCCGCCACTTTTATGAATAAAATATCGAAAAGTACAGTTTGTAGCAACTGCTGTCATC  
AAGGTGAAGCCTGANNNNNNNNNNNNNNNNNNNNNNNNNNNNNNNNNNNNNNNNNNNNNNT  
TTTAACTTATTTGTTCAAATGAAACAAAGCACCTGCACCAATGGGATACTTAAAGACTTA  
TTTGTAAATTTTGTAAAAACGAATTTACTACGACTATTAATAAATTTAACAATAACA  
CCTTAGAAATAAATGATTAATGACACAACGGGAAACTACATAATAATAATTTATACAAAT  
AATATCAGNNNNNNNNNNNNNNNNNNNNNNNNNNNNNNNNNNNNNNNNNNNNNNNNNN  
NNNNNNNAACCATATTTTACTTCAATGAACTAACCTAGAAAATTAACAAAAATCTAAAA  
GTAAATTTCTCATCGGTACACGACGTATACACGACGTGCACGCGGCCAGCGGACAAT  
AAACAGGCGGTGAGCGCCACATGCACCTTGCACACTTCCAGTTCGGCGGCTCCGTGTC  
CTGTAAAGTGTGACGTGGCCGCTCTCTGCAGCCAATCACTGCACAACTTGAGGCTGATGC  
TGAAGGAAAAGTAACTGGTAAGAGAAGCGCATTTTTTCCCTCACTCTCATTGACATTTT  
AACTCCACGACGGATCCGACGCAGATAGATTTTAAATCGGGACCTATAATTTTGTGTCG  
TGACCGCGGAGGAAAGACCCGCGGAAGGAGAAAGCGGCTTACGCGAGCAGGATACCC  
AAACTGACATTCATCCGGTGTAGTGTGACGACTTTTATGCACTTTACATTTGGTTCCTT  
CTGAACAACCAACCATATATAGGTTAAAACAAATCTGAAGACCGATGTCACCTCATCAA  
ATGTGCGCCCACTGGCTCCGATGACGTTTACGCTTTTACAAAGTGTGCAGACAGGTATT  
AAAACAAACACTCGGTCTCTCCGCCAACGTATGACTGATGATGATGATCAATAATGGTA  
AAATCACTTGGTAAGTCTTGTCTACTGTAGCCGGGAGGTGAACCCCACTTTTGTGTC  
ATTTATCAGCGCAAAATACAGCGTGAATTAGCTGTTCTCGCCGTAGAATCAAGCGCGG  
TCACTCTGAAAAACGGCTTCTCCTGCAAGAGAACCGAATGTGTTCAATCCCGGCTTC  
GATCATCAACTTCCATCAGGTTATTGAAGCCACGACGCTCCAGCGCGCGGCTGAG  
CTCTTGGACGCAAAATGTTGGGTTGACAAGTTTGTGGCGTCAGAATTTGGTCAGAATCTG  
GAGAGACGACCGCGTGATAAAGCTTTTAAAAAATGCTCCTCGGGTTTGTACTCCACGG  
TTTGCACGGTGTGTGCGTGTGTTGTCGCGTTATTTTAAAAATACATTTGTTA

---

>amplified\_fugu\_segment

TGACACAACGGGAAACTACATAATAAATTTATACAAATAATATCAGNNNNNNNNNNNN  
NNNNNNNNNNNNNNNNNNNNNNNNNNNNNNNNNNNNNNNNNNNNNAACCATATTTTAC  
TTCAATGAACTAACCTAGAAAATTAACAAAAATCTAAAAGTAAATTTCTCTCATCGGTACA  
CGCAGGTATACACGACGTGCACGCGGCCAGCGGACAATAAACAGGCGGTGAGCGGCC  
ATGCACCTTGCACACTTCCAGTTCG

---

>rCNE\_mouse\_sequence\_835990

GCACAGCAGAGCCGGTTAGCCCAAGTGCACAGCTCTTCCACCAAGCGCAAAGGAAAAA  
GAAACTTTCCCTGTTTAAATGATAGAAATACATTTAAAAGTGGTGGAAATGCCCTAATTA  
AAATGATACCCTTAAATGATATGCCAAGGACTCAGCTGCAGCTTAGCATATTTAGCTAGT  
TAGTGAACCTTCCGCCGCTCTCTTTTAAAATTAACAGCTTAAAAATTTAAAAGAAATCTT  
ACTTTTCTTGGTGAACACATTTACAAGAATGGACAGTCTTTTATCTAAATATAAAAT  
TCCATTTTCAGCAATTTAGCCTGTTCTTGGTGTATGATATAATACAGCTGTGCTCGTAA  
TAGGTGTCAAGCGGAAACACACTCACACAATGGTTGAATAAACTGCAGAACAAATGCAAG  
CACTTCTAAATTCACAACCTTTAAAATGAAATGACTGTGCAGAAATCAAAATAAAACTA  
GATAAATATTTTTTAAAAGATTAACAAGCTTGGTTTGGTTTCTTAATAGCATTTTCTAC  
AAACCTATCAACATCTAAATGATAGATAGGAATTAAGTATATAGATCAGCTGAAATCG  
TGCACATCACTTATTTTCCCAACACAGCCATAGGTAATA

---

>SCE\_mouse\_sequence\_836071

AAAATTACAGTTAAAAATTTAAAAGAAATCTTACTTTTTT

---

FUGU HITS IN THE CONTEST OF MAMMALIAN rCNE

CLUSTAL W (1.83) multiple sequence alignment

|                    |                                                               |
|--------------------|---------------------------------------------------------------|
| ENSRNOG00000004410 | GCACGGC-AGAGCCAGTTAGCCCAAGTGCAGAGCGC-TTCACCCAGC-GCAAAGGAAAAAC |
| ENSMUSG00000027168 | GCACAGC-AGAGCCGGTTAGCCCAAGTGCACAGCTC-TTCACCAAGC-GCAAAGGAAAAAC |
| ENSG00000007372    | GCAAGCCGGGAGCCAGCTAGCCCAAGTGCACATCTTGGCCCTCCAGGCAGCAAGGAAAAAC |
| ENSCAFG00000007491 | GCAAGCCGAGATACAGCTAGCCCAAGTGTGCATCTTGGCCCTCCAAGCAGCAAGGAAAAAC |
| SINFRUG00000121553 | -----                                                         |
| ENSRNOG00000004410 | AATGAAACTTTCCCA--GTTTAAATGATAGAAATACATTTAAAAGTGGTGGAAATGCCCTA |
| ENSMUSG00000027168 | AATGAAACTTTCCCT--GTTTAAATGATAGAAATACATTTAAAAGTGGTGGAAATGCCCTA |
| ENSG00000007372    | CATAAAACTTTCCCTGTATAATGATAGAAATACATTTCAAAGTGGTGGAAATGCCCTA    |

```

ENSCAFG0000007491      AATAAAACTTTCCCC--TGTTTAAATGATAGAAATTACATTAAAAAGTGGTGGAAATGCCCTA
SINFRUG00000121553      -----

ENSRNOG00000004410    ATTA AAAATGTACCACCTTAAATGATATGCCAAGGACTCAGCTGCAGCTTA-----TTTAG
ENSMUSG00000027168    ATTA AAAATGTACCACCTTAAATGATATGCCAAGGACTCAGCTGCAGCTTAGCATATTTAG
ENSG00000007372      ATTA AAAATGTACCACCTTAAATGATATGCCAAGGACTCAGCTGCAGCATAGAAATATTTAG
ENSCAFG00000007491    ATTA AAAATGTACCACCTTAAATGATATGCCAAGGACTCAGCTGCAGCATAGCATATTTAG
SINFRUG00000121553    -----

ENSRNOG00000004410    CTAGTTAGTGAACCTCTCCACCATCTCTTTCTTAAAATTACACGTTAAAAATTTAAAAGAA
ENSMUSG00000027168    CTAGTTAGTGAACCTCTCCCGCGTCTCTCTTTTAAAATTACACGTTAAAAATTTAAAAGAA
ENSG00000007372      CTAGTTAGTGAACCTCTCTACTATTTCTTTTTTAAAATTACACGTTAAAAATTTAAAAGAA
ENSCAFG00000007491    CTAGTTAGTGAACCTCTCTACTATTTCTTTTTTAAAATTACACGTTAAAAATTTAAAAGAA
SINFRUG00000121553    -----AAATTTACA-----AAAAATCTAAAAGTA
                        *****      *****      ***** *

ENSRNOG00000004410    ATCTTACTTTTCTCTGGTGCAACACATTACAAGAATGGACAGTCTTTTATCTAAATAT
ENSMUSG00000027168    ATCTTACTTTTCTCTGGTGCAACACATTACAAGAATGGACAGTCTTTTATCTAAATAT
ENSG00000007372      ATCTTACTTTTCTCTGGTGCAACACATTACAAGAATGGACAGTCTTTTATCTAAATAT
ENSCAFG00000007491    ATCTTACTTTTCTCTGGTGCAACACATTACAAGAATGGACAGTCTTTTATCTAAATAT
SINFRUG00000121553    AATTCTCTCATC-----
                        * * ** **

ENSRNOG00000004410    AAAATTCATTTTCAGCAATTATAGCCTGTTCTTGGTGATGATATAATTACAGCTGTGCT
ENSMUSG00000027168    AAAATTCATTTTCAGCAATTATAGCCTGTTCTTGGTGATGATATAATTACAGCTGTGCT
ENSG00000007372      AAAATTCATTTTCAGCAATTATAGCCTGTTCTTGGTGATGATATAATTACAGCTGTGCT
ENSCAFG00000007491    AAAATTCATTTTCAGCAATTATAGCCTGTTCTTGGTGATGATATAATTACAGCTGTGCT
SINFRUG00000121553    -----

ENSRNOG00000004410    CGTAATAGGTGTCAAGCGAAACACACTCACACAATGGTTGAATAAAAAGTGCAGAACAAAT
ENSMUSG00000027168    CGTAATAGGTGTCAAGCGAAACACACTCACACAATGGTTGAATAAAAAGTGCAGAACAAAT
ENSG00000007372      CGTAATAGGTGTCAAGCGAAAGCGCACTCATACAATAGTTGAATAAAAAGTGCAGAACAAAT
ENSCAFG00000007491    CGTAATAGGTGTCAAGCGAAAGCGCACTCATACAATAGTTGAATAAAAAGTGCAGAACAAAT
SINFRUG00000121553    -----

ENSRNOG00000004410    GCAAGCAGCTTCAAATTCACAACCTTTAAAATGAAATTGACTGTGCAGAAATCAAATAAA
ENSMUSG00000027168    GCAAGCAGCTTCAAATTCACAACCTTTAAAATGAAATTGACTGTGCAGAAATCAAATAAA
ENSG00000007372      GCGAGCAGCTTCAAATTCACAACCTTTAAA--TGAAATTGACTGTGCAGAAATCAAATAAA
ENSCAFG00000007491    GCGAGCAGCTTCAAATTCACAACCTTTAAAATGAAATTGACTGTGCAGAAATCAAATAAA
SINFRUG00000121553    -----

ENSRNOG00000004410    AACTAGATAAATAATTTTTTAAAAGATTACAAGCTTGGTTTGGTTTCTTAATAGCATTT
ENSMUSG00000027168    AACTAGATAAATAATTTTTTAAAAGATTACAAGCTTGGTTTGGTTTCTTAATAGCATTT
ENSG00000007372      AACTAGATAAATAATTTTTTAAAAGATTACAAGCTTGGTTTGGTTTCTTAATAGCATTT
ENSCAFG00000007491    AACTAGATAAATAATTTTTTAAAAGATTACAAGCTTGGTTTGGTTTCTTAATAGCATTT
SINFRUG00000121553    -----

ENSRNOG00000004410    TCTACAAACCTATCAACATCTAATTGATTAGATAGGAATTACTGATTATAGATCAGCTGA
ENSMUSG00000027168    TCTACAAACCTATCAACATCTAATTGATTAGATAGGAATTACTGATTATAGATCAGCTGA
ENSG00000007372      TCTACAAACCTATCAACATCTAATTGATTAGATAGGAATTACTGATTATAGATCAACTGA
ENSCAFG00000007491    TCTACAAACCTATCAACATCTAATTGATTAGATAGGAATTACTGATTATAGATCAGCTGA
SINFRUG00000121553    -----

ENSRNOG00000004410    AATCTTGCACATCACTCT---ATTTTCCCAACACAGCATAGGTAAATA
ENSMUSG00000027168    AATCTTGCACATCACTCT---ATTTTCCCAACACAGCCATAGGTAAATA
ENSG00000007372      AATCTTGAACATCACTCTTCTATTTTCCCAACACAGCCATAGGTAAAGA
ENSCAFG00000007491    AATCTTGAACATCACTCTTCTATTTTCCCAACACAGCTATAGGTAAATA
SINFRUG00000121553    -----

```

## Fragment ETS1\_MOUSE\_8744

Representation of conserved regions within their genic context

Within the mouse context is shown the rCNE from which the tested SCE is derived (red diamond)



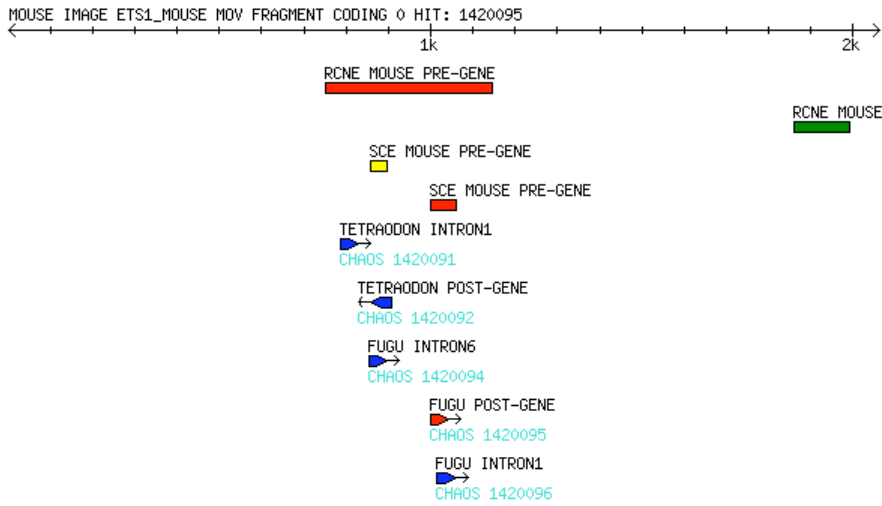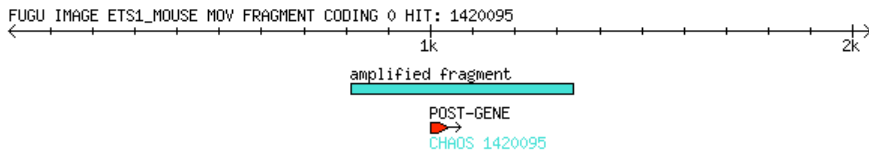

## SEQUENCES

```
>fugu_fragment_for_primer_design_8744
TTTTTCGGCTCTCTCCACTCCGCTGAGATAAAGCCTCCGCTGATTTAACGCGGTGTTG
AAGACAAAACACAGAAAAGAGGAAGTCTTTCAGAACACCAGCCTGTCACACCTGGCAGTC
GCACAGAAACTATTTCTGACGAAAAGCATCATCCTGTCCACCAGCAGCTCTCACAGCTCTC
TGACACTGGAATGTAGGCGCTTTGTCAAATTTCTAATCTAAATATTTGTCTAAAGGCTCT
CACCTAGATATATCTGTCTCCTGCATGGAGCCATAACCGAGGGAGAGGACCGGGGTGTC
TCACCGTCCAACGTGTCAGATAATGAGAATTTTCTGAAGCTATTTTCATGTGCACGTGTA
TGGCTGTTAGTTAGAATATATTCACCATTTCTTAAGTTTCCAGACAATCTGGGAAGCCAT
TGTGAAATGGGTGGATAATTTGTGCCCTTGAGGTGTGATTTGAATAAGGTTTTTGGATTT
CACAATACGTGTTGTAAGAAATACCCACATGGGGAAGTACAGAAGAACACCAGGGCAGGT
AGGTTGCCAGAGGAAACCTCAGTGAAAGTATACAAAGTGCGCCCTAATGGCTAGAGCGCT
TGTCACTTTTTGTGTTGTGCATTTTGGATTAACGACGTTGACTTTGGATGAAAGGAAGA
TGCTGGTCCACAAGAAATTTGCGTCTTTTTTAGCCTGAGAAGCCATGTGACGTTTAGGG
CCAACCTCAATGGTTCCATTACGCAGAGAAGCTGTGAAATATGACCAGCGTCCCAGTGAC
CTGAAAGGCCAAGCTTAAATCACGTGCTCCGGGGATGTGTTCTCCATGCTTTCCCCATG
TCTCATTGTCTGTATGGTTGACTTGAGCCTCTGTGAACACAGAGATGTCCAGGGAGTTF
CATCCAGCATGTTGTTTCAAGATGACCTTCTCATGGACAGAGAGACTGAAGACAAGCA
TCCCTGACGCGATCAATGGACTTGGAAGAATGTACGCTAACATAAACAGAAAAGTCCGT
CGAGGACCCCTGATTTTGTGGCCTATTCACCTGTGTTAATGACTGAGCAAAAAAGGGTGC
CAGTACTTAACCTACATAAGTGGATAAGACACAATGGAACCTGACTCCCAGAAATCAGT
AAGCACACAGATTAACGTTGCCCTAATTTCAAACCTTTTACATTTGATGATTTGAAGAAATTT
TGTGCTAAAAATAATAGAAAGTGGTTTACGAACTTATAATGGTGTCCAGATAGAAGTGG
TTCAAGGTTGCTCACTTCGCCCTCCTTCCTGTTACGCTCCTGCTCCTCCGCCCTCT
CCGTACTGTTATGTTGTGCTGTGAGATGTGTTGAACACATGCTTTGACAGGTGTGCTGA
CTGATATATCCAGACTTATGGAGGGCAGATTCAGGCCATTCGCTGTTTTGCTGTTAATTT
TGCAATTTTTATGTCAGCTGTGCATCCTCAGTTAATACACCATTTGACCCCATAGCGGAC
CCCGGACCTAACGGCAGCACCTGCTATCTCACCTGAAATGAGAGTGGCCACTGGTCCCT
GGATCAGCAATGGCTGAAACCCAGGCACCACTGACCTGGCATTCTGGGACGGAATGGA
GTGGCTCTCATGTTAATGTGGACTTTCCATTAGGAAAGATGATGATTTGTGCTGTGCT
TTGGCTGTGAATAGGATATAGACTGGCACAATAAAGTGAAGAAATGTTCTTTTGTGTGCA
GGTGAAGCCGTGTGTAACCAGACTGTGACTAAATCAGAGTGTCTGATGATAGGGCAAGAG
GGAAGGTGAGAGGAGAGACGAGCAGCAGGGGGTTAGGGAGGATAAAACAAGGCCTG
```

AGAAGTGGAAATGGCAGGTGCAATAGATGAAGGTTAGGAGACGAAACAGGACAAAGCTTTC  
TTAAAGAAAGAGAGTACCATGAGTAATGGGAGATGGAAACAATGAGGAGCCAGCTCTAT  
TCATTTTCAGCCCTTTTAAAAAATTAGATGAAAGGTGATGAAGCAGACAGAGCTTGTCACT  
G

---

>amplified\_fugu\_segment

GGGATGTGTTCTCCATGCTTTCCTCCATGTCTCATTGTCTGTCATGGTTGACTTGAGCCTC  
TGTGAACACAGAGATGTCCAGGAGTTTCATCCAGCATGTTGTTTCAAAGATGACCCCTC  
TCATGGACAGAGAGACTGAAGACAAGCATCCCTGACGCGATCAATGGACTTGGAAAGAAATG  
TACGCTAACATAAACAGAAAAGTCCGTCGAGGACCCTGATTTTGTGGCCTATTCACTGT  
GTTAATGACTGAGCAAAAAAGGGTTCGAGTACTTAACTCACATAAGTGGATAAGACAC  
AATGGAACCTGACTCCAGAAATCAGTAAGCACACAGATTAACGTTGCCATAATTTCAA  
CTTTTACATTGATGATGAAGAAAATTTTGTGCTAAAAATAAGAAAAGTGGTTGACGA  
ACTTATAATGGCTGCCAGATAGAAGTGTTCAGGTTGCTCACTTCGCCCTCCTTCTCC  
TGTTACGCTCCTGCTCCTCCGCTCCTCCGTCATTGTATTGT

---

>rCNE\_mouse\_sequence\_1261874

GCCCCAAGTCAGGTGGTAATTTGCATAGGGCAGTGTCTCCTCTCCAGGAGGTTAGGC  
CTCTCTGAGTTTCTTTTCTGTACAAGGGGAGTCGAACAGTGTCTTTAAAAAGAAAGAAA  
ACAAGACGGGTGACTTGTCTGGACCTGGGTAGTAAGGTGTTCCAAAGTCTCTGTGGAG  
TAGCTATTTCTGGCCCCATTGTCGCTTGGGTACAGAGGAAGCCCTCTGGCAATTTCTTT  
GCTTGAAAGACAGAAAACAGAACATTTTCTGACGGCTTTGATTTAATGGCCAAAAACAG  
TTATAGGAAACTGTTGAGCAGATGTTCTGAGAAACTCAGAAGAGACTGGGTCTTTGAGAA  
GGCTATTTTATAGACAAATGCTTCTACCATTTG

---

>SCE\_mouse\_sequence\_1262086

ACAGAAACAGAACTTGTTCCTGACGGCTTTGATTTAATGGCCAAAAACAGTTATAGGAA  
AC

---

FUGU HITS IN THE CONTEST OF MAMMALIAN rCNE

CLUSTAL W (1.83) multiple sequence alignment

```
ENSMUSG00000032035      GCCCCAA-GCTGCAGGTGGTAATTTGCATAGGGCAGTGTCTCCTCTCCAGGAGGTTAGG
ENSRNOG00000008941      GCCCCAG-GCTGCAGGTGGTAATTTGCATAGGGCAGCATCTCCTCTCCAGGAGGTTAGG
ENSG00000134954         GCCCCACCAGTGCAGGTGGTAATTTGCATGGGGGAGCAGAGCGTCTCCAGGAGGCTTAGG
ENSCAFG00000010304      ---GCGGCCCTGCAGGTGCGGATTTGCATGGGGGAGGCTGGCCCTCCTCCGTGAGGTTTTG
SINFRUG00000153673      -----
```

```
ENSMUSG00000032035      CCTCTCTGAGTTTCTTTTCTGTACAAGGGGAGTCGAACAGTGTCTTTAAAAAGAAAGAAA
ENSRNOG00000008941      CCTATCTAAGTTTCTTTTCTGTACAAGGGGAGTCGAACAGTGTCTTTAAAAAGAAAGAAA
ENSG00000134954         CCTATCTAAGTTTCTTCTGTACTTGGG-AGACGAACAGCCACTTTAAAA-GAGAGAAA
ENSCAFG00000010304      CCTATCCAAGTTTCTTTTCTGCTCTTGGG-AGATGAACAGCCCTTTAAAAAGAAAGAAA
SINFRUG00000153673      -----
```

```
ENSMUSG00000032035      AACAAAGAC---GGGTGACTTTG---CTTGGACCTGGG--TAGTAAGGTGTTCCAAAGTCTC
ENSRNOG00000008941      AACAAAGACAGGGGTAGCTCTG---CTTGGACCTGGG--TAGTGAGGTGTTCCAAAGTCTC
ENSG00000134954         AACAAAGACACTAGTAACCTCTGTG-CTTGGACCCGGG--CCTTTAGGTGTTCAAAGCTC
ENSCAFG00000010304      AACAAAGACACTAGTAACCCCGCTTCTTGGCCCCGGGGCTCAAGGTGTTCAAAGCTC
SINFRUG00000153673      -----
```

```
ENSMUSG00000032035      TGTGGAAGTAGCTATTTCTGGCCCCATTGTCGTCGGGTTACAGAGGAAGGCCCTCTGGC
ENSRNOG00000008941      TGTGGAACCTGGCTATTTCTGGCCCCATTGTCGTCGGGTTACAGAGGAAGGCCCTCTGGC
ENSG00000134954         CC----GTGGCTATTTCTGGCCCCATTGTCGTCGGGTTAGAGGAAGGCCCTGATGGC
ENSCAFG00000010304      CC----GTGGCTATTTCTGGCCCCATTGTCGTCGGGGCTGAGAGGAAGGCTGATGGC
SINFRUG00000153673      -----
```

```
ENSMUSG00000032035      AATTCTTTGCTTTGAAAGACAGAAAACAGAACATTTTCTGACGGCTTTGATTTAATGGCC
ENSRNOG00000008941      AATTCTTTGCTTTGAAAGACAGAAAACAGAACATTTTCTGACGGCTTTGATTTAATGGCC
ENSG00000134954         GATTTCTGTGCTTTAAAGGCAGAAAACAGAACATTTTCTGACGGCTTTGATTTAATGGCC
ENSCAFG00000010304      AATTCTTTGCTTTAAAGGCAGAAAACAGAACATTTTCTCGGGCTTTGATTTAATGGCC
```



The mouse context contains:

- rCNEs green boxes, in red the one considered for this test
- SCEs yellow boxes, in red the one considered for this test
- CHAOS hits blue boxes, in red the one considered for this test

The fugu context contains:

- the fragment amplified in this test
- CHAOS hits blue boxes, in red the one considered for this test

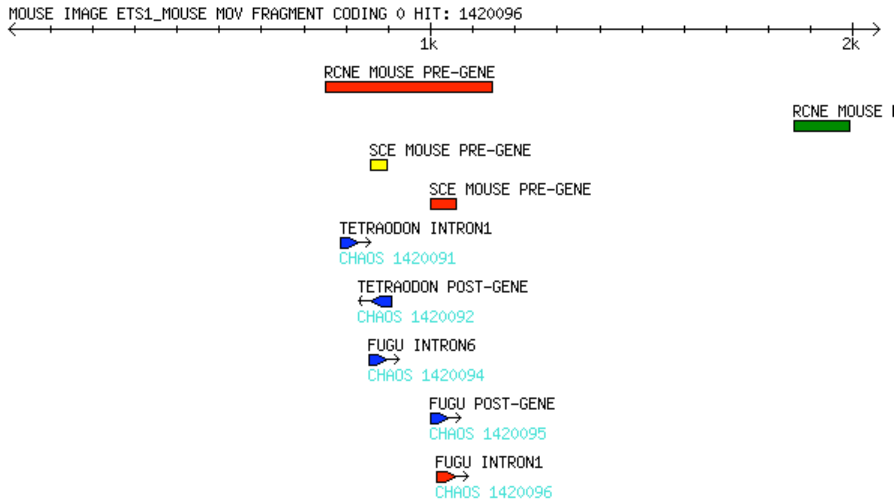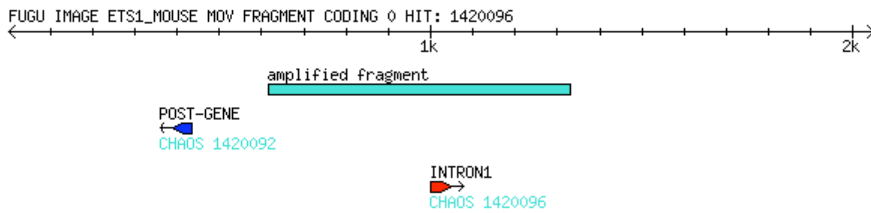

## SEQUENCES

```
>fugu_fragment_for_primer_design_8745
GTAGACTATAAATGGACTTCAAACATGATGCACGCCCATTTGTGCATGTAATATAATTGA
AGACAGCGTTTGCATCACTAATAACCCGCGCATGCATCAAGAATGCCGGTCATTTGACAA
ATCGCTGTACATTTCCATGTGTGACTGTTTCCTGTAGGGTCCCATGCTGGCATCATA
AATAGGGTTGTGGAATGTATCAGTTTGGACTAAAAAATGGACAAGCACTGTTTGGTGGA
AAAAATAGAACACTAAGATTAACAGTTTGTGATATGTTGTGTGTTTGGTTAAATGCC
TAAACAGTCCCCCAGAGATCCTCTGTCTGTTTACAGCAATGCTGGCCTGCCAGCCTG
GAGCGACCATGCTAACAACACCTGCACATCCTGAAGTTCTCATTTCTCTGCCACTGTTG
TCGTCAGAGACATAACATGTCAGTCTGATACTATTGGACATGTAGTGCTTCTATCATAGT
TTCCACCTGCAGACATGATGGGAGTTGATCTTTTGTACTCAGTTTCAACCTAATGGAGA
ATTTGTGGGAGGTTCCGGTAGANNNNNNNNCTATCCGAAGACAGGAAACCTAAAAGAATC
CCATCTAGTTTACACCGATTCGCCATCAGTCAACATGTTTCAGATAAAAAGTCAACACC
```



TATGTTGTTTCTTCGAGTTTATGNNNNNNNNNGTTACATTTACAATTTTGCATGCAGAC  
ATGCTGGAAAATTTGGCTGCTGACGTTTNNNNNNNNNNNTAAGCAGAGCAAAAAGTTC  
AAATAGCTTCTTTCAGCTTTGAGAAATCGATGTTTGCAGCTGTGCGTCCGATTGCAGAG  
GTAATGCCATATCAAGTGTGAGACCTTAGTCTGATGCACCTTTACATCATAAGCTAAT  
GTGATTTCTTTGATGGAGGAAGTGAAGTAAGAAAAGCAGCTATGGGGTATTAGTCTCA  
CTTACAGTCAGCTTCCAGTAGCCAGTATGTCTGTGCTGTGATCATCTGGACCCTCTTGT  
TTCATGGCCAAAGACAGATGTCAGCAGCAGGCTCATCTGCACAGCTGNNNNNNNNNN  
NNAAGCCGCTCGGGCTTGTCTTTCAGCGGTGACGCCAGCAGCAGCTGTGCCAACCTAAG  
AATAGATCCTATGTGTCAGCATCATCCGCGATGGCAGGATTTAAGTTTAAACCCCTTTG  
ACATGAGAGAAGACGCCATGCTGTTCTGCTGTTGCTGCAATGAAAAGTCTAAATTGC  
CACGGTTGAACGAGCCGCTCTCACATCCAGCCGACCTCACCTGCTCTGTTGCTG  
CCACTACAGCGGGTGTATCGCCCTGTGTTCTCAATGGCCCTTTCATGGAAGTCAGT  
TTTATGACCTGTGTTCTCCAACAGGGTCCAGATATAGATCTCCATCAAAGAGCCTCT  
CACATACCGCGTCCACTCTGCTGTGCTGCGGGCGCTTAGCTGGCCCAAAGAGACAAT  
TATATGCTGTAAACCCCTTTTTCGAGTCTGCTGATATGACCTGTGACTTGTGGGGT  
TATTTAGGAAGGGTGTAAAGCTCGGGCAGCAAGTGGAAATTTATTTGACCTCAACTGAA  
CCCATCACTTACTTCCCTAGGGTGGCAACTTAGCCACAGGAAATGACTCTTTGGCTCT  
CGNNNNNNNCAACCCCAAGAAAACAGGTACATTCAGTAGCAAGAGGGCGCACATCCG  
TGCTGCTTCTTCTCTTTTCTTTTCCAGAACTCCCAAACGTTTGTGCAGAAATGGTT  
CNNNNNNNNNNNNNNNNNNNNNNNTGTCAACTTCCCGATGATTACAGATGTGGAA  
TGAATGCGGGTTAAATAACCTTGTATCTTGGAGAAATGAAGTAGATGGGGTCAGAAATG  
TGGCAACAGAGACAGGAACCCATGATAGGGTATTGTTGAGACCACCTGGCTCTGACTA  
AAACTCTAAAGGGCTATTTATAGCTGTGTGTTTGGAGCATACTGTCCTTATTTTGTG  
GTCTGGT

---

>amplified\_fugu\_segment

CCGATTCTCCCATCAGTTCAACATGTTTCAAGATAAAAAGTCAACACTATGTTGTTCTTC  
GAGTTTATGNNNNNNNNNGTTACATTTACAATTTTGCATGCAGACATGCTGGAAAATTT  
GGCTGCTGACGTTTNNNNNNNNNNNTAAGCAGAGCAAAAAGTTCAAAATAGCTTCTCTT  
CAGCTTTGAGAAATCGATGTTTTCAGCTGTGCGTCCGATTGCAGAGGTAATGCCATATCA  
AGTGGTGAACCTTAGTCTGATGCACCTTTACATCATAAGCTAATGTGATTTCTTTGAT  
GGAGGAAGTGAAGTAAGAAAAGCAGCTATGGGGTATTAGTCTCACTTACAGTCAGCTT  
CAGTAGCCAGTATGCTGTGCTGTGATCATCTGAGCCACTTGTGTTTCAAGGCAAAAGA  
CAGATGTGAGCAGCAGGCTCATCTGCACAGCTGNNNNNNNNNNNAGCCGCTCGGG  
CTTGTCTTTCAGCGGTGACGCCAGCAGCCAGTCTGTCGCAACCTAAGAAATAGATCCTATGT  
GTCAGCATCATCCGCGATGGCAGGATTTAAGTTTAAACCCCTTTGACATGAGAGAAGAC  
GCCATGTCTGTTCTGTTGCTGCAATGAAAAGTCTAAATTGCCACGGTTGAACGAG  
CCGCCCTCTACATCCAGCCGACCTCACCTGCTCTGTTGCCCACTACAGC

---

>rCNE\_mouse\_sequence\_1261874

GCCCCAAGCTGCAGGTGGTAATTTGCATAGGGCAGTGTCTCCTCCCAGGAGGTAGGC  
CTCTCTGAGTTTCTTTCTGTACAAGGGAGTCGAACAGTGTCTTTAAAAAGAAAGAAA  
ACAAGACGGGTGACTTTGCTTGGACCTGGGTAGTAAGTGTTCCAAAGTCTCTGTGGAG  
TAGCTATTTCTGGCCCAATGTCGTCTGGGTACAGAGGAAGGCTTCTGGCAATCTTT  
GCTTGAAGACAGAAACAGAACTTGTCTTTCGACGGCTTTGATTTAATGGCCAAAAACAG  
TTATAGGAACTGTTGAGCAGATGTTCTGAGAACTCAGAAAGACTGGGTCTTTGAGAA  
GGCTATTTTGTAGACAAATGCTTCTTACCATTTGG

---

>SCE\_mouse\_sequence\_1262086

ACAGAAACAGAACATTTGTTCTGACGGCTTTGATTTAATGGCCAAAAACAGTTATAGGAA  
AC

---

FUGU HITS IN THE CONTEST OF MAMMALIAN rCNE

CLUSTAL W (1.83) multiple sequence alignment

|                    |                                                               |
|--------------------|---------------------------------------------------------------|
| ENSG00000134954    | GCCCCACCACTGCAGGTGGTAATTTGCATGGGGGAGCAGAGCGTCTCCCAGGAGGCTAGG  |
| ENSCAFG00000010304 | ---GCGGCCCTGCAGGTGCGGATTTGCATGGGGGAGGCTGGCCCTCCTCCGTGAGGTTTGG |
| ENSMUSG00000032035 | -GCCCCAAGCTGCAGGTGGTAATTTGCATAGGGCAGTGTCTCCTCTCCCAGGAGGTTAGG  |
| ENSRNOG00000008941 | -GCCCAAGCTGCAGGTGGTAATTTGCATAGGGCAGCCTCCTCTCCCAGGAGGTTAGG     |
| SINFRUG00000153673 | -----                                                         |

|                    |                                                              |
|--------------------|--------------------------------------------------------------|
| ENSG00000134954    | CCTATCTAAGTTTCTTCTGTACTTGGG-AGACGAAACAGCCACTTTAAAAA-GAGAGAAA |
| ENSCAFG00000010304 | CCTATCCAAGTTTCTTCTGCTCTTGGG-AGATGAACAGCCTCTTTAAAAAGAAAGAAA   |

```

ENSMUSG0000032035 CCTCTCTGAGTTTCTTTTCTGTACAAGGGGAGTCGAACAGTGTCTTTAAAAAGAAAGAAA
ENSRNOG0000008941 CCTATCTAAGTTTCTTTTCTGTACAAGGGGAGTCGAACAGTGTCTTTAAAAAGAAAGAAA
SINFRUG00000153673 -----

ENSG00000134954 AACAAAGACACTAGTAACTCTG--TGCTTGGACCCGGG--CCTTTAGGTGTTTCAAAGCCTC
ENSCAFG00000010304 AACAAAGACACTAGTAAACCCCGCTTCTTGGCCCCGGGGGCTCAAGGTGTTTCAAAGCCTC
ENSMUSG00000032035 AACAAAGAC--GGGTGACTTTG---CTTGGACCTGGG--TAGTAAAGTGTTCCAAAGTCTC
ENSRNOG0000008941 AACAAAGACAGGGGTAGCTCTG---CTTGGACCTGGG--TAGTAAAGTGTTCCAAAGTCTC
SINFRUG00000153673 -----

ENSG00000134954 CC-----GTGGCTATTTCTGGCCCCATTGTCGTCGGGTCTGAGAGGAAGGCCTGATGGC
ENSCAFG00000010304 CC-----GTGGCTATTTCTGGGGCCCATGTCGTCGGGGGCTGAGAGGAAGGTCTGATGGC
ENSMUSG00000032035 TGTGGAAGTGTACTATTTCTGGCCCCATTGTCGTCGGGTACAGAGGAAGGCCTCCTGGC
ENSRNOG0000008941 TGTGGAACGTGCTATTTCTGGCCCCATTGTCGTCGGGTACAGAGGAAGGCCTCCTGGC
SINFRUG00000153673 -----

ENSG00000134954 GATTCTGTGCTTTAAAGGCAGAAAACAGAACATTGTTTTTGCCAGCTTTGATTTAATGGCC
ENSCAFG00000010304 AATTCTTTGCTTTAAAGGCAGAAAACAGAACATTGTTTTCTCCGGCTTTGATTTAATGGCC
ENSMUSG00000032035 AATTCTTTGCTTTGAAAGACAGAAAACAGAACATTGTTTTCTGACGGCTTTGATTTAATGGCC
ENSRNOG0000008941 AATTCTTTGCTTTGAAAGACAGAAAACAGAACATTGTTTTCTGACGGCTTTGATTTAATGGCC
SINFRUG00000153673 -----ATCATCTGGACCCTCTTGTTCATGGCC
                        ** *          ** * ** * *****

ENSG00000134954 AAAAAAGTTATAGGAACTGTTTCAGCAGATGTTTTATGAAACTCAGAAAAGATTGGGTC
ENSCAFG00000010304 AAAAAAGTTATAGGAACTGTTTCAGCAGATGTTTTATGAAACTCAGAAAAGATTGGGTC
ENSMUSG00000032035 AAAAAAGTTATAGGAACTGTTGAGCAGATGTTCTGAGAAACTCAGAAAGACTGGGTC
ENSRNOG0000008941 AAAAAAGTTATAGGAACTGTTGAGCAGATGTTCTGAGAAACTCAGAAAAGACTGGGTC
SINFRUG00000153673 AAAGACAGATGTCAGCAGC-----
                        *** ** * * * * *

ENSG00000134954 TTTTAGAAGGGCTATTTTGTAGACAAATGCTTCCTACCATTTGG
ENSCAFG00000010304 TTTTAGAAGGGCTATTTTGTAGACAAATGCTTCCTACCATTTGG
ENSMUSG00000032035 TTTTAGAAGGGCTATTTTGTAGACAAATGCTTCCTACCATTTGG
ENSRNOG0000008941 TTTTAGAAGGGCTATTTTGTAGACAAATGCTTCCTACCATTTGG
SINFRUG00000153673 -----

```

---



---

## Fragment ETS1\_MOUSE\_8726

Representation of conserved regions within their genic context

Within the mouse context is shown the rCNE from which the tested SCE is derived (red diamond)

Within the fugu context all CHAOS hits obtained from the mouse rCNE are shown (green diamonds, in red the one tested)

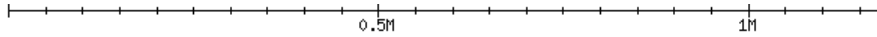

**Mus musculus**

ETS1\_MOUSE.1  
 |++-----|  
 ETS1\_MOUSE.2  
 |---H-||  
 ETS1\_MOUSE.3  
 |---|++  
 rCNE

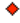

**Fugu rubripes**

SINFRUG00000153673.1  
 |#  
 SINFRUG00000153673.2  
 |  
 SINFRUG00000153673.3  
 |  
 SINFRUG00000153673.4  
 |#  
 SINFRUG00000153673.5  
 |  
 SINFRUG00000153673.6  
 |  
 SCE

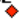

Conserved regions shown within 2000bp context

The mouse context contains:

- rCNEs green boxes, in red the one considered for this test
- SCEs yellow boxes, in red the one considered for this test
- CHAOS hits blue boxes, in red the one considered for this test

The fugu context contains:

- the fragment amplified in this test
- CHAOS hits blue boxes, in red the one considered for this test





Representation of conserved regions within their genic context

Within the mouse context is shown the rCNE from which the tested SCE is derived (red diamond)

Within the fugu context all CHAOS hits obtained from the mouse rCNE are shown (green diamonds, in red the one tested)

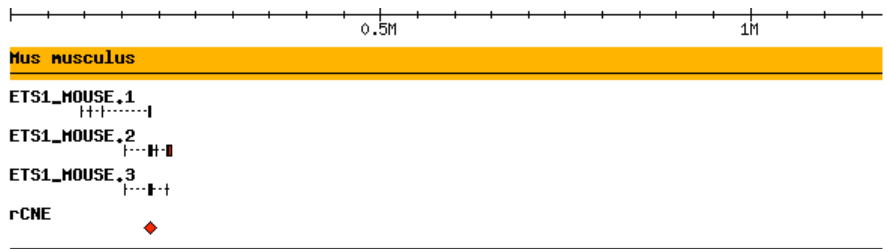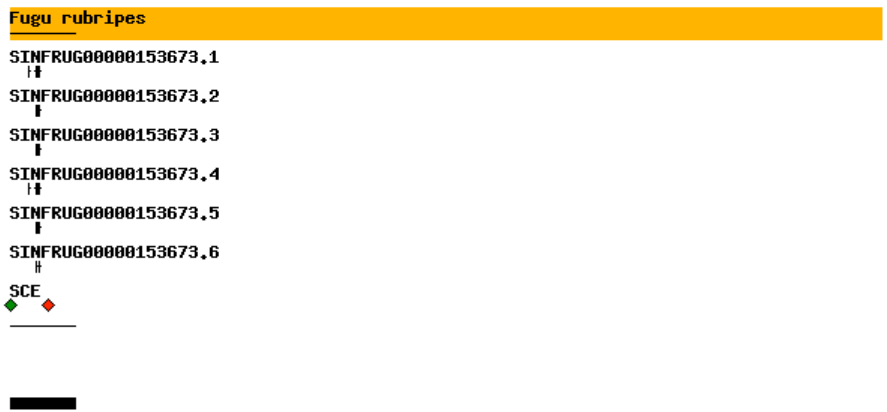

Conserved regions shown within 2000bp context

The mouse context contains:

- rCNEs green boxes, in red the one considered for this test
- SCEs yellow boxes, in red the one considered for this test
- CHAOS hits blue boxes, in red the one considered for this test

The fugu context contains:

- the fragment amplified in this test
- CHAOS hits blue boxes, in red the one considered for this test

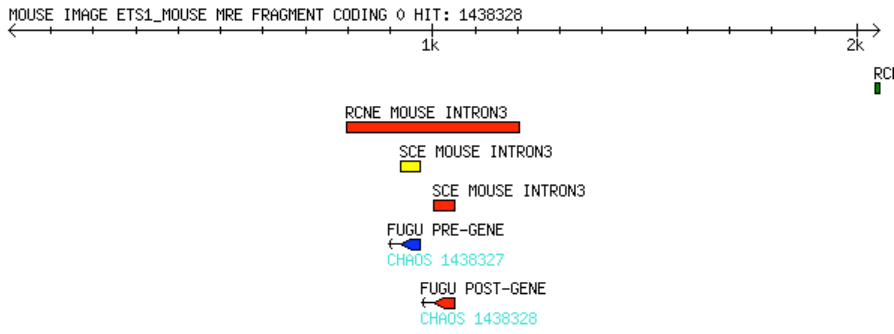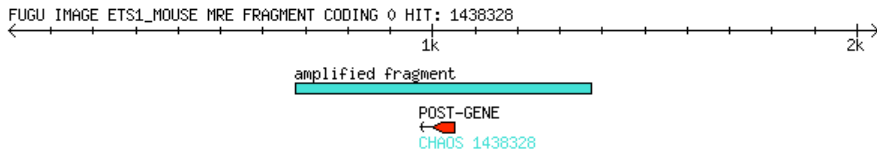

## SEQUENCES

```
>fugu_fragment_for_primer_design_8728
ACTTCTGTTTAAACCCAAATGGAAAGACAGACTCTCCAGTGCAGACCAGCATCATTGCCA
GTGAGGTGTTGGATGCAGGCAGAGCTGTGTAGCTCTACACAAATACACAAGTTTAAAGAT
CGGCTACAGTGTGAACTTCCTCTCGTCTCCACGTTGATTCATGATGACGAACTG
ATAATTAATAATGTAAGGACTTTATGCCAAGAAAACCTACTACTATTAACTATTTATA
CTTCACCATGGAGCTGTATTAGACAGAACTTCAATGCTGTGTAATAAGAGATGCTTAACC
TGAGATGCTTAAACTCTCTGTGGTGTGTCATGTAATCATATTTAATGTGACTTGGTTTCTA
CAATAAAAATCTCTGTGCACCCTGACTGTGTGCAGAGGAAGCATTCACATGATGAGTTGAG
CCAAGACCTGTTTGGCCATTACCACAAACCATCTTCTCATGCTTCTTCCCCACGGCGC
AAGTATCCTGGATGCTCAAGGTCCAACCTGAAACACTGTGGACGTTCTCCTGGCTGTCT
CCGTACATCCAAGTTAAGAGTACTTGCACAAACCCACATCTGCCTCAAATGAGGGTTTGCC
CTGAACCTAACTGGCTGCGTTTATCACTGAAGAGAAAGTTATGCTGAATATTGCTCAG
GCCACAAATAATGCTGAGCCTAAACACACCACCTCGGGTGAATTTGCATGGTCTGTGC
ATGAAGGCCAGGCCAACCATAAATGCACCAAGCATAAATAACTAAACCCCATGAAAAAT
GCATTATATGATGCTGAGAGCAGTTTCAATAGGACTGATGTTTCATGTTCCAGGGATACA
GAGGAAGGACAGCTAGATGCTTAGCTAAGTTTGGTAAATAACAGAACGAAAGCAAAGAGT
TGAATTAACCCAGTGTCCCGGTACACAAACAGGACAGTGAATGGGAGACTGCAGAAAGA
AGAAAGCCCAAGGACACATACAGGAGGTCGACTGAGCGCTATATAGAAATTTAGAAATAG
ATATGAAGGAGCACGGAATGTCGACTTACGTTGCCCTCATTTTCATGAGCTGAGTTTG
GAGGGTCCAGAATGTCATCTTTGAGTCATTTACAGATGATAACCGTGTGGACCCGGAG
CCAGCCATACATTTACAGCCGCTATCTTAAATGTCAGTTCTCAAAGCTTACGGAATCC
CTCCTGCTCTCTGAGCTGGAATGCAAGTCTTACACTTCAAATATAAGTCTCCAGTAAC
AACATGGTTTATTATTACAATAGCAACAATACTAAGACAAGTAGGAATTTGATAAAAAG
CAGAGACTTATAAGAAAATATCATCTGACTTACGTCAGCCATTTTCTCACGATTTTCTT
TTATTTTCATGTTGGAATTTAAGCCACATTTACTCAAATAAGTAGTACTGTTTGTGCT
TATACCAAAATGTAATACATGGCCAACAATCCAACCCGACGCCAGCTACTGTTGTGTCT
GTTTCAGTAGTCTGACTAAGGTTATAGCTTAGAAGGTTTAAAGACAAGTTTGAATGGAG
TGCTTACTCAGTGGGACACTCTCCAGTTTTTCACCATTACGGGGGCCAAGGGGCCAA
GGACAGCGGAGAGATGGGCTCCTGTGCTCCACAGCAATCTCTGTGGCTGGGAAAGGCTA
CGGCCACTGTTCTCACCATTTCCTCTGTATTACCAGCCCTGGTNNNNNNNNNNNNNN
NNNNNNNNNNNNNNNNNNNNNNNNNNNNNNNNNNNNNNNNNNNNNNGGAGTGGACTCCAGGAAC
AACTATGCTCAGGACTTAGCCAAAATATTAAGTCAAAGGATGACTCGTGTGGTAA
AAAGCATGGCACATTTAATTAACTTTCATAGGAAAAGGGAGTTTAAAGAAAGAACTTCTCTCT
TTTTTGTAAATGGTGTGCTCTGTAGGATCTTTGGGAAAACACTCAGCCGATGACAA
CAATCCACATTCAGGTTACTCTTGTGACGAAGTATAAGAAATAGAAAACATTTTCCCTT
TTGTTAGTAG
```

>amplified\_fugu\_segment  
AGCCTAAACACACCACCTCGGGTGTAAATTTGCATGGTCTGTGCATGAAGGCCAGGCGCAA  
CCATAAATGCACCAAGCATAAATAACTAAACCCCATGAAAAATGCATTATATGATGTCG  
AGAGCAGTTTCAATAGGACTGATGTTTCATGTTCCAGGGATACAGAGGAAGGACAGCTAGA  
TGCTTAGCTAAGTTTGGTAAATAACAGAAAGCAAGAGTTGAATTTACCCAGTGTG  
CCGGTACACAACAAGGACAGTGTGGGAGACTGCAGAAAGAAAGAAAGCCAAAGGACAC  
ATACAGGAGGTCGACTGAGCGCTATATAGAAATTTAGAATAGGATATGAAGGACACGGA  
AATGTCGACTTACGTTGCCTCTCATTTTCATGAGTGTGGAGGGTTCCAGAATGTC  
CATCTTTGAGTCAATTTTCAGATGATAACCGTGTGGACCCGGAGCCAGCCATACATTTCA  
GCCGCTATCTTAAAAATGCAGTTCCCTCAAAGCTCTACGGAATCCCTCCTGCTCTCTGCAGC  
TGGAATGCAAGTCTTACACTTCAAATATAAGTCTCCAGTAAACAACATGGTTTATTATTA  
CAATAGCAACAATACTAAGACAAGTAGGAATTTGTATAAAAAGCAGAGACTTATAAGAAA  
ACTATCATCTGACTTACGTACGCCATTTTCTCACGA

>rCNE\_mouse\_sequence\_1261937  
AGACAAGTTTCTTCGCCAGTCACTGGCTTGGGATTAAGGCAGCGTAGAATACCTTTTACA  
TTTGAGGCCAAAGCTAGGGTTATATCAGGACGTTGGTGTGCAACCTTTGTAATGACACAGC  
CTCCTCTACTGGCTGGCCTCTTCTAACCTTTTGGACCAAGTGACTCATGTCCCGTAGC  
TCCGGCTGAGTATAGCAACAGCAGCGGCCGCAAACTTGGGTGTTCTGTGCTTATTTGT  
CTAAATTTCTTCTTAAAAATAAATGGCAGTTACAGCAGTGCAGTGCCTTACAGCTGAC  
TGTAAGCCTAGAAGCCTGCTGCCCTCTGTAAACCAGGCCACCCCTTTCCCTGTGGTTACCA  
GCCTCAATCTCTAGGCACAGCATCTGGGGCAGGGCACACAGCTCAG

>SCE\_mouse\_sequence\_1262071  
CGGGCCGCAAACTGGGTGTTTCTGTGCTTATTTGTCTAAATTTCTTCTTA

FUGU HITS IN THE CONTEST OF MAMMALIAN rCNE

CLUSTAL W (1.83) multiple sequence alignment

```
ENSMUSG00000032035      AGACAAGTTTCTCTGCC-AGTCACTGGCTTGGGATTAAGGCAGCGTAGAATACCTTTTAC
ENSRNOG00000008941      CGACAAATGTCTCTGCC-AGTTGCTGGTTTGGCATTTATGGCGGTGTAGAACACCTTTTAC
ENSG00000134954         AGACAGATTTCTCTGCCACTAACTGAATTTGGAATTTGCAGTAGTGCATCATACTTTTAC
ENSCAFG00000010304      AGACTGGCTTCTCTGCCCTACC TGGGTGGAATTTGCAGTCGTTGGGTACCTTTTTC
SINFRUG00000153673      -----
```

```
ENSMUSG00000032035      ATTTGGAGCCAAAGCTAGGGTTATATCAGGACGTTGGTGTGCAACCTTTGTAATGACACAG
ENSRNOG00000008941      ACTCCGAGCCAAAGCTAGGGTTATATCAGGACGTTGGTGTGCAACCTTTTAAATGACACAG
ENSG00000134954         ATCTGGAGCAGGAAGCTGGGGTTATATCAGGACGCTATGTTGCAACCTTATAATGACATGG
ENSCAFG00000010304      ATCTGGAGCAGCAGCTGGGGTTATATCAGGATACCGTGTGCAACCTTTGTAATGACATGG
SINFRUG00000153673      -----
```

```
ENSMUSG00000032035      CCTCCCTACTGGCCTGGCCTCTTCTAACCTTTTGGACCAAGTGACTCATGTCCCGTAG
ENSRNOG00000008941      CCTCCCTACTGGCC-----TCTTCTAACCTTTTGGACCAAGTGACTCATGTCCCGTAG
ENSG00000134954         CCTCCCTAACAGCC-----TCTTCCAACCTTTTGGACCAAGTGACTCATGTACCACAG
ENSCAFG00000010304      CCTCCCTTACCAGCC-----TCTTCCAACCTTTTGGACCAAGTGACTCATGTACCACAG
SINFRUG00000153673      -----
```

```
ENSMUSG00000032035      CTCCGGCTGAGTATAGCAACAGCAGCGGGCCGCAAACTTGGGTGTTTCTGTGCTTATTTG
ENSRNOG00000008941      CACCGGCTGAGTATAGCAACAGCAGCGGGTGGCAAACTTGGGTGTTTCTGTGCTTATTTG
ENSG00000134954         TCCTGGCTGAGTATAGAAAACAGCAGCAGCGGGCAAACTTGGGTGNNNNNNNNNNNNNNNN
ENSCAFG00000010304      TCTTGGCTGAGTATAGAAAACAGCAGCAGCGGGCAAACTTGGGTGTTTTCGACTTATTTT
SINFRUG00000153673      -----GTAAGTCGGACATTTCCGTGCTCCTTCATATCTTAT
                               * * * * *
                               * * * * *
```

```
ENSMUSG00000032035      TCTAAATTTCTTCTTAAAAATAAATGGCAGTTACAGCAGTGCAGTGCCTTACAGCTGA
ENSRNOG00000008941      TCTAAATTTCTTCTTAAAAATAAATGGCAGTTACAGCAGTGCAGTGCCTTACAGCTGA
ENSG00000134954         NNNNNNNNNNNNNCTTAAAAATAAATGGCAGTTACAGCAGTGCAGTGCCTTACAGCTGA
ENSCAFG00000010304      TCTGAATTTCTTCTTAAAAATAAATGGCAGTTACAGCAGTGCAGTGCCTTACAGCTGA
SINFRUG00000153673      TCTAAATTTCTTATATA-----
                               **
```

```
ENSMUSG00000032035      CTGTAAGCCTAGAAGCCTGCTGCCCTCTGTAACC-AGGCCACCCCTTCCCTGTGGTTAC
ENSRNOG00000008941      CTGTAAGCCTAGAAGCCTGCTGCCCTCTGTAACC-AGGCCACCCCTTCCCTGTGGTAC
ENSG00000134954         CTGTAAGCCTAGAAGCCATTGCCCTCTTAACCCAGGCCATTCCTTCCCTGTGGTCAAT
```



ENSCAFG00000010304 CTGTAAGCCTAGAAGCCCGTTGCCCTCCCTGACCCAGGCCACCCTTTCCCTGTGGTCAC  
 SINFRUG000000153673 -----

ENSMUSG00000032035 CAGCCTCAATCTCTAGGCACAGCAICTGGGGGCAGGGCACACAGCTCAG  
 ENSRNOG00000008941 CAGCCTCAAGCTCTAGGCACAGTCACTGGGGGTAGGGCACAGAGCTCAT  
 ENSG000000134954 CAGCTCTAA-CCCTTGGCACAGACGCTGGGGGAGGGGAGCAAACCTCAG  
 ENSCAFG00000010304 CCGCTCAA-CCCTTGGCGCAGACGCTGGGGGCAGGGAGCAAAGCTCAG  
 SINFRUG000000153673 -----

# Fragment Mapkap1\_17058

Representation of conserved regions within their genic context

Within the mouse context is shown the rCNE from which the tested SCE is derived (red diamond)

Within the fugu context all CHAOS hits obtained from the mouse rCNE are shown (green diamonds, in red the one tested)

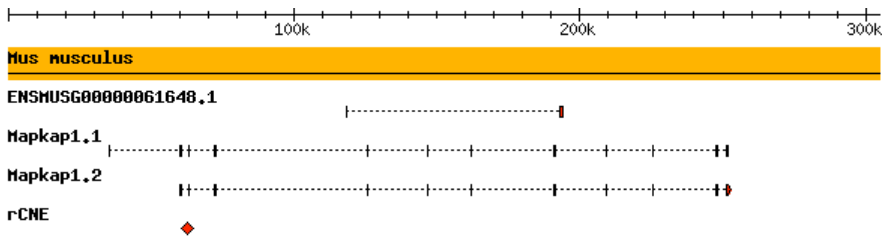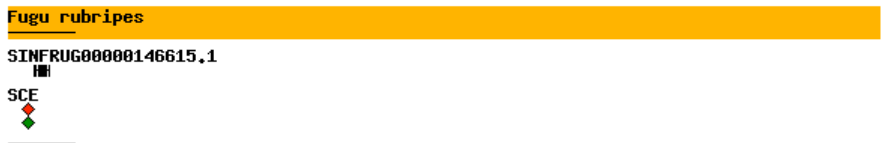

Conserved regions shown within 2000bp context

The mouse context contains:

- rCNEs green boxes, in red the one considered for this test
- SCEs yellow boxes, in red the one considered for this test
- CHAOS hits blue boxes, in red the one considered for this test

The fugu context contains:

- the fragment amplified in this test

-CHAOS hits blue boxes, in red the one considered for this test

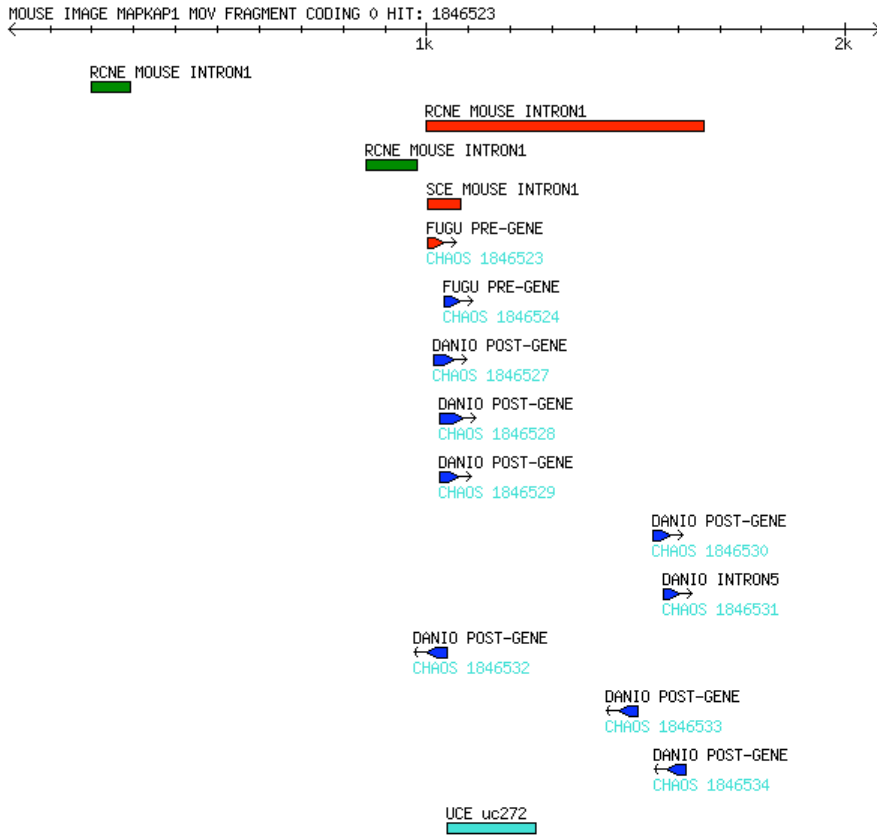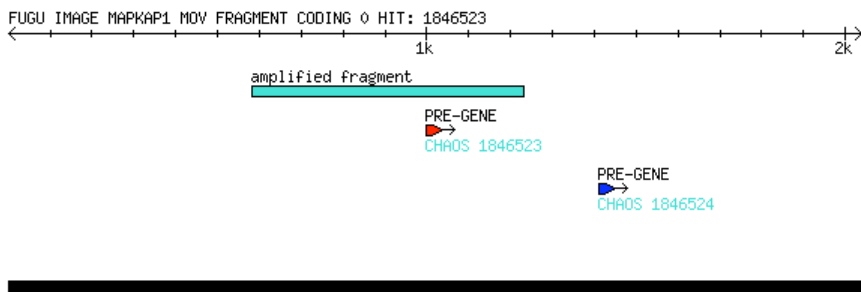

SEQUENCES

```
>fugu_fragment_for_primer_design_17058
TCCTGACTGCTGGAAACCCCTCGTCTGCAGCCAGGACAACATTTTCAGATCTCAGTCCAGCT
CGGTCCCTGTCACTAATCGCTGTGAAAGTCAAACAATGCAGAAGCCTTTTGGGAAACCAG
TGAGAGTGATCGACACTCCAGACTTTTTTCACAGCCAGATGAAAGACTCGGAGCTGCAGA
TAGAAGAATGCAAGAAGTTCTGTGCGCCAGGCCAGTGTGTGGTGTACTTGGTGTTCAGC
TGGGACGCTTCACCCGTGAGGACCAAGAACTCCTGGAGAAGCTGGAGGACAAGTTTGGCT
GGAGAATCAGGGAGAGACAATCATTTCTTTGACCCAGGAGAGGACCTGAAAGGAGACT
GGGGCCATCTATTAAAGCCGACACTGAACTCTGGAATACTATTGAAGCATGCGGCTCTC
GTTATCATGTATCAGCAACAATTTCCAGAAAAGTGAAGCAAGTCATAGACCTCCCTCAAGA
AGATACCAGACTTTAAAAACATTTTCCAGACTTCAGGAGCTCACCAGTAAATTTGTTTTTC
AAAGTTAGTTTACCATTTTTATGGACTGGAATCTACGGTTAGGCATGGGGACAGAGT
```

GAAAAGAACACTTCTCATTACACAAAAATGACATGAGTATACCAATCAATAAAATGAA  
AGATGAATCAATTCATCCTGCATATATGAGGATAAAGCAACTGATATATAACAATTCCTGT  
CAACTGGTACAAAAGAAGAAAACTAATGAGCTATAATTTTACCAAACTTTACCAAACTTT  
TTTTTAAATTTATCTTATTCACCTCCCTGGCTAAAAGATCAATATGGAACCTTATAATGT  
GAAAATGTCTTCCTATATATGTCCTTTCTCTGGTGTGGGGGAGGGCAGAGATTTGTCA  
AGAAGAGACTAGAATTTAAAAACCAACACAACCTTTTGTGAGTTTAAATTTTCCAAAAGGA  
GCAGGGTGGCCCATGTGGAGCTGACAAGTCAGGAAATTCACCAAGGAATGACTCTTGGGT  
CTTTTAAAGAACTACCTAAAATGAGAGACTTGAGACAGATTCACAAATCATAACCACTTTAT  
AATGAATAATGTTTAAAGTTTGTGACTGGGATCCAGGGCGAAATAGAGGAAATTAATAAA  
TGTACAGTTCAGAGGTCTATGAACAGAAAACTGAAATGAGACTGACCCCTAGGGGCAGC  
AAATAAGGCAAAATGCAACCACCATCAATAAATTCCTCATCTTATAGAGCCGATTTGTGT  
AGGTGTGTGAGGCAGGCTTGGTTAAGGAGGGCTTAGGTGAGAGAAAGTACTTTTGAACAT  
AATGCAATTTGGAACAGATTTGGAGTTATGGTGGACGGGTTACTGAAGGGGAAGTGAGT  
GAATAGGGAGTTCTGAATACATTTAAGTTTATTTTTTAAACCCCTATTGTACTTTTCTA  
CATTTATTTAATAAAGTCATACTTACTTTCTCCCGTAGAACTAACGTTGGTGGATTTTGG  
AATTTGATAATTTGAGTTAGAGATGGCTCCAGGAGACTTTTTTGCCTCTTTTGTATGTC  
CATAACCCACCAAAATTTAATTCATGTAGCTCTAACCATATCTGTNNNNNNNNNNNN  
NNNNNNNNNNNNNNNNNNNNNNNNNNNNNNNNNNNNNNNNNNNNNNNNNNNNNNNNNN  
CGCAAATTTTCAACGGTTGTCGAGCGATTTCAAATGCAAATTTATGTTGGAGAGAATAA  
CAAAAACACAAATTTGAAAACAAATAGGCTTATGAAAGATAATCTCAGGTTTTATGCA  
TAAACAGACCACACACATGGGCTAGACTTCCAAACTAAATCGGTGAATAAATTTTACC  
ACAAGTGGCAGATTTGGCCCTTTGCGCCGTTGACACCGAAGAAATCCACCACAGAAGA  
AGAGAATCTGCATCGAAGCTACACTAAATGAGCTATTGATCGTTTTACAGTTTTATC  
ATGCCCTTTAGTATATCGCTTTCCFAAGCTCCGAATATTATTTCTGCTCACAGACTGG

---

>amplified\_fugu\_segment

TTAGGCACTGGGGACAGAGTGAAGAACAACCTTCTCATTACACAAAAATGACATGAGT  
ATACCAATCAATAAAATGAAAGATGAATCATTCCTGCATATATGAGGATAAAGCAAC  
TGATATATAACAATTCCTGTCACTGGTACAAAGAAAGAAATCTAATGAGCTATAATTTT  
ACCAAATCTTACCAAACTTTTTTTTAAATTTATCTTATTCACCTCCCTGGCTAAAAGATTC  
AATATGGAACCTTATAATGTGAAAAATGTCCTCTATATGTCCTTTCTCTGGTGTGG  
GGGAGGGCAGAGATTTGTCAAGAAGAGACTAGAATTTAAAAACCAACACAACCTTTTGTG  
AGTTTTAATTTTCCAAAAGGAGCAGGGTGGCCCATGTGGAGCTGACAAGTCAGGAAATTC  
CAAGGAATTTGACTCTTGGGCTTTTAAAGAACTACCTAAAATGAGAGACTTTGAGACAGAT  
CCAAATCATAACCACTTTATAATGAATAATGTTTAAAGTTTTTGTACTGGGATCCAGGGCG  
AAATAGAGGAAATTTACTAAATGTCACGTTTCCAGAGGCTATGAAACAGAAAACTGAAATGA  
GACTGACCCCTAGGGCAGCAAATTAAGCAAAATGCAACCACCATCAAT

---

>rCNE\_mouse\_sequence\_1596340

GTGATCAAGGAATTTACTTTTTAATCTTTTCAGTACATCTTAAAGTTTTTTAAAGAAAA  
TTGTTCTTTTTTAAGATTTGACTAATGTTTACAAGATACAATCATTTATTTTACTACCTA  
TAAACTGTTTTCAGCCACTGAAGAAAAGCTATGCTAATTTATATAGCTTTGACATTTTAT  
AATTTTCATGATTTTATGATAAAGGATTTTATATTTAAAATTTAATAGTCTAGTCTGAG  
TTCAATTTATCTTTAATTTTTGAAACGGGTAGAGTAATTCATAACAGTAATTTTATTCCTG  
TAATGTAATATTCACCTTCAGTTTCTTTTGTGCAATTAATAATTCCTTTAAGACCGTTATTAAT  
GATTTATATAATGAAATGTCATATTAATCACAGAAGTTTTTACATTTTATTTATCTCTTC  
CATGTTAATACTATCTTTTATGATCTTATTAATGTTTTATATCCTTAATTTCAATTTATA  
AATCAAGAATATTTTCATGTTTTTGTGGTATTTGCTTTTTCAGGGTGGCCACTTTAAAA  
TTTTATGACTTTTTCCCTCCATATGCAATATAAAACATCTTTATTCATATAAAGGTAGTT  
AATTTATGCTTTTGTATATAGTAAACTTTCATTTGACAAACTTATAGTTATAATATTTCTTT  
TCAAG

---

>SCE\_mouse\_sequence\_1596400

TCAAGGAATTTACTTTTTAATCTTTTCAGTACATCTTAAAGTTTTTTAAAGAAAAATTTG  
TCTTTTTAAGATTTGACTAAT

---

FUGU HITS IN THE CONTEST OF MAMMALIAN rCNE

CLUSTAL W (1.83) multiple sequence alignment

|                    |                                                                 |
|--------------------|-----------------------------------------------------------------|
| ENSG00000119487    | GTGACCAAGAATTTACTTTTTTAAATCCATGCAGCATATCTTAAAAATTTTGTAAAAGAAAA  |
| ENSCAFG00000020178 | GTGACCAAGAATGTACTTTTTTAAATCCCTTCAGCATATCTTAAAAATTTGTATAAGAAAA   |
| ENSRNOG00000017583 | GTGATCAAGGAATTTAGTTTTTAAATCTTTTCAGTACATCTTAAAGTTTTTTAAAGAAAA    |
| ENSMUSG00000038696 | GTGATCAAGGAATTTACTTTTTTAAATCTTTTCAGTACATCTTAAAGTTTTTTA--AAGAAAA |
| SINFRUG00000146615 | ----CCAAGGAATTTGACTTTGGGCTTTTTAAGAATACCTAAA-----                |

\*\*\* \*\* \* \* \* \* \* \*\* \* \* \* \* \*

ENSG00000119487 ATGTGTTCTTTTAAAGATTTGACTAATGTTACAAAGATACAAATCATTTATTTACTACCT  
ENSCAFG00000020178 ATTATTCCTTTTAAAGATTTGACTAATGTTACGAGATACAAATCATTTATTTACTACCT  
ENSRNOG00000017583 ATGTGTTCTTTTAAAGATTTGACTAATGTTACAAAGATACAAATCATTTATTTACTACCT  
ENSMUSG00000038696 ATGTGTTCTTTTAAAGATTTGACTAATGTTACAAAGATACAAATCATTTATTTACTACCT  
SINFRUG00000146615 -----

ENSG00000119487 ATAAACTGTTTCAGCCCACTGAAGAAAAGCTATGCTAATTTATATAGCTTTGACATTTTA  
ENSCAFG00000020178 ATAAACTGTTTCAGCCCACTGAAGAAAAGCTATGCTAATTTATATAGCTTTGACATTTTA  
ENSRNOG00000017583 ATAAACTGTTTCAGCCCACTGAAGAAAAGCTATGCTAATTTATATAGCTTTGACATTTTA  
ENSMUSG00000038696 ATAAACTGTTTCAGCCCACTGAAGAAAAGCTATGCTAATTTATATAGCTTTGACATTTTA  
SINFRUG00000146615 -----

ENSG00000119487 TAATTTTCATGATTTTTAGATAAAGGATTTTATATTTAAAACCTTAATAGTCTAGTCTGA  
ENSCAFG00000020178 TAATTTTCATGATTTTTAGATAAAGGATTTTATATTTAAAACCTTAATAGTCTAGTCTGA  
ENSRNOG00000017583 TAATTTTCATGATTTTTAGATAAAGGATTTTATATTTAAAACCTTAATAGTCTAGTCTGA  
ENSMUSG00000038696 TAATTTTCATGATTTTTAGATAAAGGATTTTATATTTAAAACCTTAATAGTCTAGTCTGA  
SINFRUG00000146615 -----

ENSG00000119487 GTTCATTTATCTTTAAATTTTGAATGGGTAGAGTAATTCATAACAGTAATTTTATTCCT  
ENSCAFG00000020178 GTTCATTTATCTTTAAATTTTGAACGGGTAGAGTAATTCATAACAGTAATTTTATTCCT  
ENSRNOG00000017583 GTTCATTTATCTTTAAATTTTGAACGGGTAGAGTAATTCATAACAGTAATTTTATTCCT  
ENSMUSG00000038696 GTTCATTTATCTTTAAATTTTGAACGGGTAGAGTAATTCATAACAGTAATTTTATTCCT  
SINFRUG00000146615 -----

ENSG00000119487 GTAATGTAATATTCACCTCAGTTCATTTGTCATTAATAATTCCTTTAAGACCGTTATTAA  
ENSCAFG00000020178 GTAATGTAATATTCACCTCAGTTCATTTGTCATTAATAATTCCTTTAAGACCGTTATTAA  
ENSRNOG00000017583 GTAATGTAATATTCACCTCAGTTCATTTGTCATTAATAATTCCTTTAAGACCGTTATTAA  
ENSMUSG00000038696 GTAATGTAATATTCACCTCAGTTCATTTGTCATTAATAATTCCTTTAAGACCGTTATTAA  
SINFRUG00000146615 -----

ENSG00000119487 TGATTTATATAATGAAATGTCATATTAATCACAGAAGTTTTCACATTTTATTTCTCTT  
ENSCAFG00000020178 TGATTTATATAATGAAATGTCATATTAATCACAGAAGTTTTCACATTTTATTTCTCTT  
ENSRNOG00000017583 TGATTTATATAATGAAATGTCATATTAATCACAGAAGTTTTCACATTTTATTTCTCTT  
ENSMUSG00000038696 TGATTTATATAATGAAATGTCATATTAATCACAGAAGTTTTCACATTTTATTTCTCTT  
SINFRUG00000146615 -----

ENSG00000119487 CCATGTTAATACTATCTTTATGATCTCTATTAGTGTGTTTATATCCCTAATTTCAATTAT  
ENSCAFG00000020178 CCATGTTAATACTATCTTTATGATCTCTATTAGTGTGTTTATATCCCTAATTTCAATTAT  
ENSRNOG00000017583 CCATGTTAATACTATCTTTATGATCTCTATTAGTGTGTTTATATCCCTAATTTCAATTAT  
ENSMUSG00000038696 CCATGTTAATACTATCTTTATGATCTCTATTAGTGTGTTTATATCCCTAATTTCAATTAT  
SINFRUG00000146615 -----

ENSG00000119487 AAATCAAGAAATTTTTCATGTTTTGTTGGTATTTGCTTTTCAGGGGTGCCACCTTTAAA  
ENSCAFG00000020178 AAATCAAGAAATTTTTCATGTTTTGTTGGTATTTGCTTTTCAGGGGTGCCACCTTTAAA  
ENSRNOG00000017583 AAATCAAGAAATTTTTCATGTTTTGTTGGTATTTGCTTTTCAGGGGTGCCACCTTTAAA  
ENSMUSG00000038696 AAATCAAGAAATTTTTCATGTTTTGTTGGTATTTGCTTTTCAGGGGTGCCACCTTTAAA  
SINFRUG00000146615 -----

ENSG00000119487 ATTTTATGACTTTTTCCTACATATGCAATATAAAACATCTTTATTCATGTAAGGTAGT  
ENSCAFG00000020178 ATTTTATGACTTTTTCCTACATATGCAATATAAAACATCTTTATTCATGTAAGGTAGT  
ENSRNOG00000017583 ATTTTATGACTTTTTCCTCCCATATGCAATATAAAACATCTTTATTCATGTAAGGTAGT  
ENSMUSG00000038696 ATTTTATGACTTTTTCCTCCCATATGCAATATAAAACATCTTTATTCATGTAAGGTAGT  
SINFRUG00000146615 -----

ENSG00000119487 TAATATGTCCTTTGTTTATAGTAAACTTTCATTGACAAACTTACAGTTATAATATTTCTT  
ENSCAFG00000020178 TAATATGTCCTTTGTTTATAGTAAACTTTCATTGACAAACTTACAGTTATAATATTTCTT  
ENSRNOG00000017583 TAATATGTCCTTTGTTTATAGTAAACTTTCATTGACAAACTTACAGTTATAATATTTCTT  
ENSMUSG00000038696 TAATATGTCCTTTGTTTATAGTAAACTTTCATTGACAAACTTACAGTTATAATATTTCTT  
SINFRUG00000146615 -----

ENSG00000119487 TTCAAG  
ENSCAFG00000020178 TTCAAG  
ENSRNOG00000017583 TTCAAG  
ENSMUSG00000038696 TTCAAG  
SINFRUG00000146615 -----

# Fragment Mapkap1\_17059

Representation of conserved regions within their genic context

Within the mouse context is shown the rCNE from which the tested SCE is derived (red diamond)

Within the fugu context all CHAOS hits obtained from the mouse rCNE are shown (green diamonds, in red the one tested)

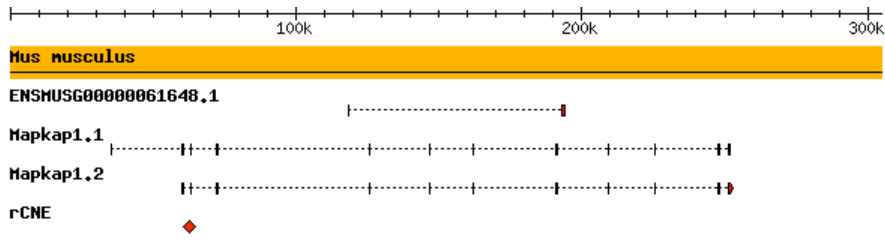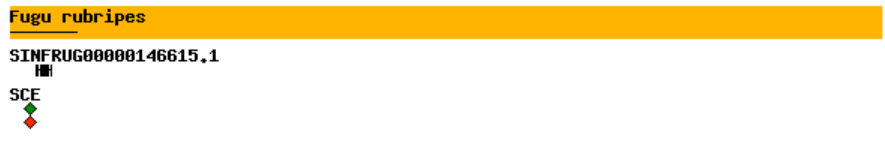

Conserved regions shown within 2000bp context

The mouse context contains:

- rCNEs green boxes, in red the one considered for this test
- SCEs yellow boxes, in red the one considered for this test
- CHAOS hits blue boxes, in red the one considered for this test

The fugu context contains:

- the fragment amplified in this test
- CHAOS hits blue boxes, in red the one considered for this test

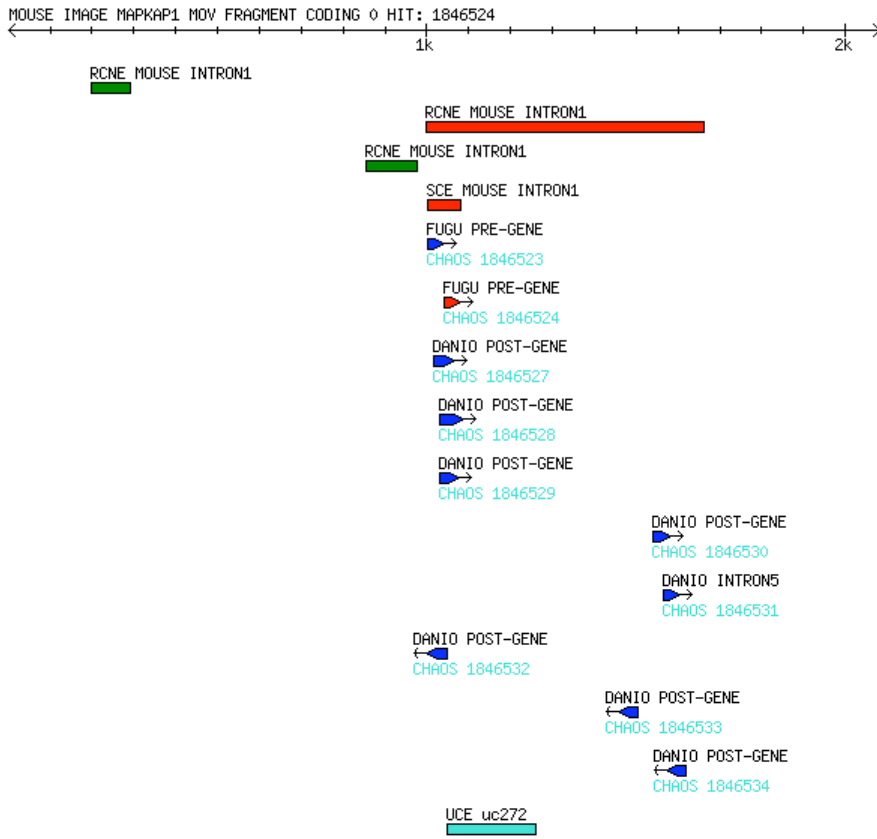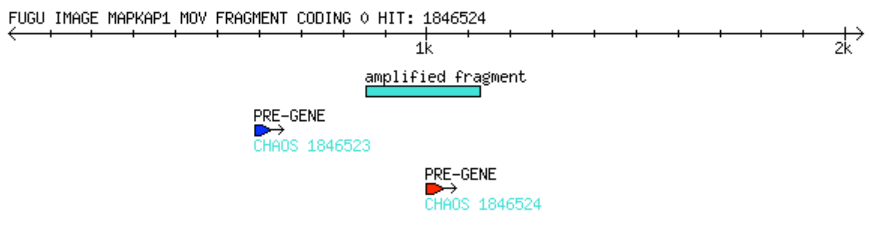

SEQUENCES

```
>fugu_fragment_for_primer_design_17059
GCGGCTCTCGTTATCATGTCATCAGCAACAATTCCAAGAAAGTGAAGCAAGTCATAGACC
TCCTCAAGAAGATACCAGACTTTAAAAACATTTCCAGACTTCAGGAGTCACCGATTA
ATTGTTTTCAAAGTTAGTTTGACCAATTTTATGGACTGGAAATCTACGGTTAGGCACTGG
GGACAGAGTGAAAAGAACAACCTTCTCATTTCACACAAAAATATGACATGAGTATACCAATCAA
TAAAATGAAAGATGAATCATTCATCCTGCATATATGAGGATAAAGCAACTGATATATAAC
AATTCCTGTCAACTGGTACAAAAGAAGAAAATCTAATGAGCTATAATTTTACCAATCTTA
CCAAATCTTTTTTAAATTAATCTTATTCACCTCCCTTGGCTAAAAGATTCATATGGAAAC
TTATAATGTGAAAATGTCTTCTCTATATATGTCTTTTCTCTGGTGTGGGGGAGGGCAGA
GATTTGTCAAGAAGAGACTAGAATTTAAAAACCAACCAACTTTTGCTGAGTTTAAATTTT
CCAAAAGGAGCAGGGTGGCCCATGTGAGCTGACAAGTCAGGAAATTCCTCAAGGAATGA
CTCTGGGTCTTTTAAAGAACTACCTAAATGAGAGACTTGAGACAGATTCCAAATCATAA
CCACTTTATAATGAATAATGTTTAAAGTTTTTACTGGGATCCAGGGCGAAATAGAGGAA
ATTACTAAATGTCACGTTGAGAGCTTATGAACAGAAAAACTGAAATGAGACTGACCCCT
AGGGCAGCAAAATAGGCAAAATGCAACCACCATCAATAAATTCCTCATCTTATAGAGCC
```

```
CGATTGTGTAGGTGTGTGAGGCAGGCTTGGTTAAGGAGGGCTTAGGTCAGAAGAAGTACT
TTTGAACATAATGCAATTTGGAACAGATTTGGAGGTTATGGTGGACGGGTTCACTGAAGGG
GAAGTGAAGTGAATAGGGAGTCTGAATACATTTAAGTTTATTTTTTAAAAACCCCTATTGT
ACTTTTCTACATTTTAAATAAAGTCATCTTTACTTTCTCCCGTAGAACTAACGTGGT
GGATTTTGAATFGATAATGAGTTGAAGATGGCTCCAGGAGACTTTTTTGGCCGTCFTT
TTGATGTTCCATAAACCACCAAAATTTAATTCATGTAGCTTAACCATATCTGTCTNNNN
NNNNNNNNNNNNNNNNNNNNNNNNNNNNNNNNNNNNNNNNNNNNNNNNNNNNNNNNNNNN
TTTTTGTACCCCAAAAAATTTGCGTACTCTCCCGCAT
TTTTGGGTACGCAAAATTTTCAACGGTTGTGAGCGATTTCAAAATGCAAAATTTATGTGGGA
GAAGAATAACAAAAACACAAATTTTGAACAAATAGGGCTTTATGAAGATAATCTCAGG
TTTTATGCATAAACAGACCACAACACATGGGCTAGACTTCCAAACTAAATCGGTGAAATA
AATTTTACCACAAGGTGGCAGATTTGGCCCTTTGCGCCGTTGGACCGGAAAGAAATCCAC
CACAGAAGAAGAGAAGCTCTGCATCGAAGCTACACTAAATGAGCTATTTGCATCGTTTTAC
AGTTTTATCATGCTTTAGTATATCGCTTTCCCTAAGCTCCGAACTATTTATCTGCTCAC
AGACTGGATGGATAAAATGGCCGATGTGAAAGGTTTTTTTTCTCACTGGATGTGACTAA
AGGTAGGTCCTCCGTCATGAAGTAGCAGCATAGCAGCTAGTTTAGCTGGTCCCTTAAGGAA
GCATTACTGGGGTTAACCTGCGTTAACCTACTGAAACAACTGGTTTTTATCACCCTGAAA
GACACCTTACACATTTTCATGTCTCAAAACAGGTTATATTTAATGAAAATGTAGTCTGTC
AACAAAGGAATATAGCTAGGTTCAAGCGACAGCAACGAAATGCCACTGTACACCGGAATAA
CACATCCAGTTTGATTTCTAAAGTTAATCAAGATCAAAATTTTCAGAAAAGACCACATCCA
TTCTTAAACAAAAACACTTTTTTAAATGCATTTGATCATCATCTTCAGTTGAAGGATATAT
```

---

```
>amplified_fugu_segment
GTGAGGCAGGCTTGGTTAAGGAGGGCTTAGGTCAGAAGAAGTACTTTTTGAACATAATGCA
ATTTGGAACAGATTTGGAGGTTATGGTGGACGGGTTCACTGAAGGGGAAGTGAAGTGAATAG
GGAGTTCTGAATACATTTAAGTTTATTTTTTAAAAACCCCTATTGTACTTTTCTACATTTA
TTTAAATAAAGTCACTACTTTACTTTCTCCCGTAGAACTAACGTGGTGGATTTTGAATTGA
TAATTTGAGTTAGAAGATGGCTCCAGGAGACTTTT
```

---

```
>rcNE_mouse_sequence_1596340
GTGATCAAGGAAATTTACTTTTTAATCTTTTCAGTACATCTTAAAGTTTTTTAAAGAAAAA
TTGTTCTTTTTAAGATTTGACTAATGTTCACAAAGATACAAATCATTTATTTTACTACCTA
TAAACTGTTTCAGCCCACTGAAGAAAAGCTATGCTAATTTATATAGCTTTGACATTTTAT
AATTTTCATGATTTTGTAGATAAAGGATTTTATATTTAAACTTTAATAGTCTAGTCTGAG
TTCATTTATCTTTAATTTTTGAAACGGGTAGAGTAATTCATAACAGTAATTTTATTCCTG
TAATGTAATATTCACATTCAGTTTCATTTTGTGCATTTAAATTCCTTTAAGACCGTTATTAAT
GATTTATATAATGAAATGTCATATTAATCACAGAAGTTTTCACATTTTATTTATCTCTTC
CATGTTAATACTATCTTTTATGATCTCTATTAATGTTTTATATCCTCTAATTTCAATTATA
AATCAAGAAATATTTTCATGTTTTTGTGGTATTTGCTTTTCAGGGGTGCCACCTTTAAAA
TTTTATGACTTTTTCCTCCATATGCAATATAAAACATCTTTATTTATATAAAGGTAGTT
AATTTATGCTTTTGTATATAGTAAACTTTTCATTTGACAAACTTATAGTTATAATATTTCTTT
TCAAG
```

---

```
>SCE_mouse_sequence_1596400
TCAAGGAATTTACTTTTTAATCTTTTCAGTACATCTTAAAGTTTTTTAAAGAAAAATTTGT
TCTTTTTAAGATTTGACTAAT
```

---

FUGU HITS IN THE CONTEST OF MAMMALIAN rCNE

CLUSTAL W (1.83) multiple sequence alignment

```
ENSG00000119487      GTGACCAAAGAATTTACTTTTTAATCCATGCAGCATATCTTAAAATTTTGTAAAAGAAAA
ENSCAFG00000020178  GTGACCAAAGAATGACTTTTTAATCCTTTCAGCATATCTTAAAATTTTGTATAAGAAAA
ENSMUSG00000038696  GTGATCAAGGAATTTACTTTTTAATCTTTTCAGTACATCTTAAAAGTTTTTAAAGAAAA
ENSRNOG00000017583  GTGATCAAGGAATTTAGTTTTTAAATCTTTTCAGTACATCTTAAAAGTTTTTAAAGAAAA
SINFRUG00000146615  -----ATTTTTTTAAACCCCT
                                     *** * **

ENSG00000119487      ATTGTTCTTTTTAAGATTTGACTAATGTTACAAAGATACAAATCATTTATTTTACTACCT
ENSCAFG00000020178  ATTATCTTTTTAAGATTTGACTAATGTTACGAAGATACAAATCATTTATTTTACTACCT
ENSMUSG00000038696  ATTGTTCTTTTTAAGATTTGACTAATGTTACAAAGATACAAATCATTTATTTTACTACCT
ENSRNOG00000017583  ATTGTTCTTTTTAAGATTTGACTAATGTTACAAAGATACAAATCATTTATTTTACTACCT
SINFRUG00000146615  ATTGTACTTTTCTACATTTATTTAAT-----
                                     *** * ***** * **** *

ENSG00000119487      ATAAACTGTTTCAGCCCACTGAAGAAAAGCTATGCTAATTTATATAGCTTTGACATTTTA
```

|                    |                                                                 |
|--------------------|-----------------------------------------------------------------|
| ENSCAFG00000020178 | ATAAACTGTTTGAAGCCACTGAAGGAAAGCTATGCTAATTTATATAGCTTTGACATTTTA    |
| ENSMUSG00000038696 | ATAAACTGTTTGAAGCCACTGAAGGAAAGCTATGCTAATTTATATAGCTTTGACATTTTA    |
| ENSRNOG00000017583 | ATAAACTGTTTGAAGCCACTGAAGGAAAGCTATGCTAATTTATATAGCTTTGACATTTTA    |
| SINFRUG00000146615 | -----                                                           |
|                    |                                                                 |
| ENSG00000119487    | TAATTTTCATGATTTTGTAGATAAAGGATTTTATATTTAAAACCTTTAATAGTCTAGTCTGA  |
| ENSCAFG00000020178 | TAATTTTCATGATTTTGTAGATAAAGGATTTTATATTTAAAACCTTTAATAGTCTAGTCTGA  |
| ENSMUSG00000038696 | TAATTTTCATGATTTTGTAGATAAAGGATTTTATATTTAAAACCTTTAATAGTCTAGTCTGA  |
| ENSRNOG00000017583 | TAATTTTCATGATTTTGTAGATAAAGGATTTTATATTTAAAACCTTTAATAGTCTAGTCTGA  |
| SINFRUG00000146615 | -----                                                           |
|                    |                                                                 |
| ENSG00000119487    | GTTCATTTATCTTTAATTTTGAAGTGGGTAGAGTAATTCATAACAGTAATTTTATTCCT     |
| ENSCAFG00000020178 | GTTCATTTATCTTTAATTTTGAAGTGGGTAGAGTAATTCATAACAGTAATTTTATTCCT     |
| ENSMUSG00000038696 | GTTCATTTATCTTTAATTTTGAAGTGGGTAGAGTAATTCATAACAGTAATTTTATTCCT     |
| ENSRNOG00000017583 | GTTCATTTATCTTTAATTTTGAAGTGGGTAGAGTAATTCATAACAGTAATTTTATTCCT     |
| SINFRUG00000146615 | -----                                                           |
|                    |                                                                 |
| ENSG00000119487    | GTAATGTAATATTCACCTTCAGTTCATTTGTGCATTAATAATTCCTTTAAGACCGTTATTTAA |
| ENSCAFG00000020178 | GTAATGTAATATTCACCTTCAGTTCATTTGTGCATTAATAATTCCTTTAAGACCGTTATTTAA |
| ENSMUSG00000038696 | GTAATGTAATATTCACCTTCAGTTCATTTGTGCATTAATAATTCCTTTAAGACCGTTATTTAA |
| ENSRNOG00000017583 | GTAATGTAATATTCACCTTCAGTTCATTTGTGCATTAATAATTCCTTTAAGACCGTTATTTAA |
| SINFRUG00000146615 | -----                                                           |
|                    |                                                                 |
| ENSG00000119487    | TGATTTTATATAATGAAATGTCATATTAATCACAGAAGTTTTCACATTTTATTTCTCTTT    |
| ENSCAFG00000020178 | TGATTTTATATAATGAAATGTCATATTAATCACAGAAGTTTTCACATTTTATTTCTCTTT    |
| ENSMUSG00000038696 | TGATTTTATATAATGAAATGTCATATTAATCACAGAAGTTTTCACATTTTATTTCTCTTT    |
| ENSRNOG00000017583 | TGATTTTATATAATGAAATGTCATATTAATCACAGAAGTTTTCACATTTTATTTCTCTTT    |
| SINFRUG00000146615 | -----                                                           |
|                    |                                                                 |
| ENSG00000119487    | CCATGTTAATACTATCTTTTATGATCTCTATTAGTGTGTTTATATCCTCTAATTTCAATTAT  |
| ENSCAFG00000020178 | CCATGTTAATACTATCTTTTATGATCTCTATTAGTGTGTTTATATCCTCTAATTTCAATTAT  |
| ENSMUSG00000038696 | CCATGTTAATACTATCTTTTATGATCTCTATTAGTGTGTTTATATCCTCTAATTTCAATTAT  |
| ENSRNOG00000017583 | CCATGTTAATACTATCTTTTATGATCTCTATTAGTGTGTTTATATCCTCTAATTTCAATTAT  |
| SINFRUG00000146615 | -----                                                           |
|                    |                                                                 |
| ENSG00000119487    | AAATCAAGAATATTTTCATGTTTTGTTGGTATTTGCTTTTCAGGGGTGCCACCTTTAAA     |
| ENSCAFG00000020178 | AAATCAAGAATATTTTCATGTTTTGTTGGTATTTGCTTTTCAGGGGTGCCACCTTTAAA     |
| ENSMUSG00000038696 | AAATCAAGAATATTTTCATGTTTTGTTGGTATTTGCTTTTCAGGGGTGCCACCTTTAAA     |
| ENSRNOG00000017583 | AAATCAAGAATATTTTCATGTTTTGTTGGTATTTGCTTTTCAGGGGTGCCACCTTTAAA     |
| SINFRUG00000146615 | -----                                                           |
|                    |                                                                 |
| ENSG00000119487    | ATTTTATGACTTTTCTCTACATATGCAATATAAAACATCTTTATTCATGTAAGGTAGT      |
| ENSCAFG00000020178 | ATTTTATGACTTTTCTCTACATATGCAATATAAAACATCTTTATTCATGTAAGGTAGT      |
| ENSMUSG00000038696 | ATTTTATGACTTTTCTCTACATATGCAATATAAAACATCTTTATTCATGTAAGGTAGT      |
| ENSRNOG00000017583 | ATTTTATGACTTTTCTCTACATATGCAATATAAAACATCTTTATTCATGTAAGGTAGT      |
| SINFRUG00000146615 | -----                                                           |
|                    |                                                                 |
| ENSG00000119487    | TAATTTATGCTTTGTTTATAGTAAACTTTCATTGACAAACTTACAGTTATAATATTTCTT    |
| ENSCAFG00000020178 | TAATTTATGCTTTGTTTATAGTAAACTTTCATTGACAAACTTACAGTTATAATATTTCTT    |
| ENSMUSG00000038696 | TAATTTATGCTTTGTTTATAGTAAACTTTCATTGACAAACTTACAGTTATAATATTTCTT    |
| ENSRNOG00000017583 | TAATTTATGCTTTGTTTATAGTAAACTTTCATTGACAAACTTACAGTTATAATATTTCTT    |
| SINFRUG00000146615 | -----                                                           |
|                    |                                                                 |
| ENSG00000119487    | TTCAAG                                                          |
| ENSCAFG00000020178 | TTCAAG                                                          |
| ENSMUSG00000038696 | TTCAAG                                                          |
| ENSRNOG00000017583 | TTCAAG                                                          |
| SINFRUG00000146615 | -----                                                           |

---



---

## Fragment Hmx3\_11669

Representation of conserved regions within their genic context



Within the mouse context is shown the rCNE from which the tested SCE is derived (red diamond)

Within the fugu context all CHAOS hits obtained from the mouse rCNE are shown (green diamonds, in red the one tested)

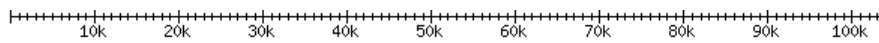

**Mus musculus**

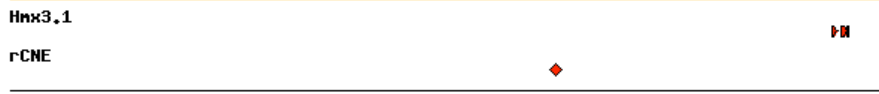

**Fugu rubripes**

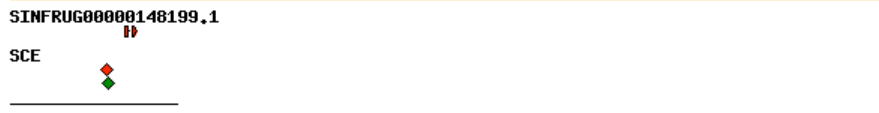

Conserved regions shown within 2000bp context

The mouse context contains:

- rCNEs green boxes, in red the one considered for this test
- SCEs yellow boxes, in red the one considered for this test
- CHAOS hits blue boxes, in red the one considered for this test

The fugu context contains:

- the fragment amplified in this test
- CHAOS hits blue boxes, in red the one considered for this test

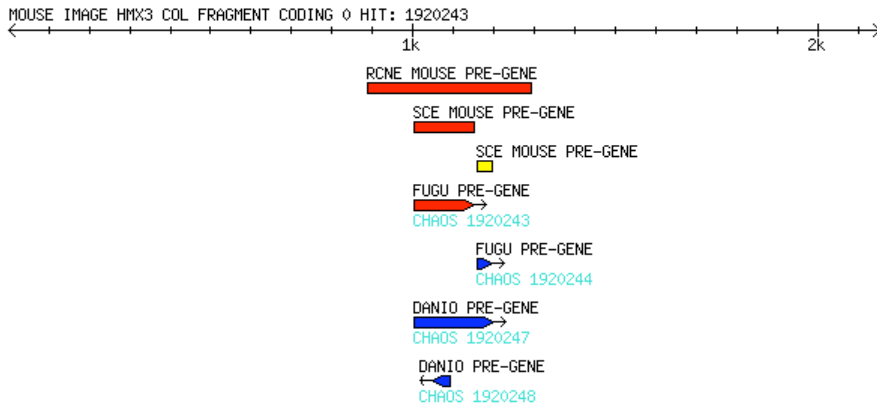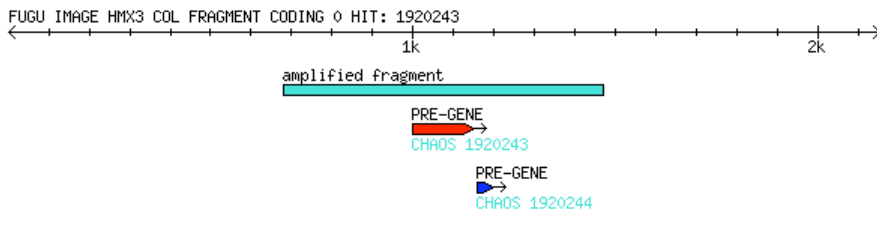

SEQUENCES

```
>fugu_fragment_for_primer_design_11669
CAAATGGAATATGAAGAGAGACAGCCAGGAATAACAAATGTCCACGCAATTAAGAAGGA
GAATGACAAGAAGTTTGCCTTCATTCCTCACCTTAAAAATGCACCTTTTTCCTGTATTAT
ACAGGAAGTCAAGTGGCAACTAAAGTGCACCAACCTGGATGACATTGAGCTCATTCGACT
CGCTGGCGGAGGGCTCGCGTAAAAGCCAACCTGGGTCGTAAGTCAGGATTCACCTGGACA
CCACAATCAATACCTGCACAATCCCAATTAAGCGTGCCTGGGTCGGGGTCCACCA
ATTCCCTTTCAAGTTAAAAGCAATCTCAAATCGAAAACAATTCGGCGTGGCTTCGCTG
GTTTAAATGGCGGAAACCAACAGCGTGTCCGGTAAAAATGGAAGAGAGGCGAGGTGAGGGT
GGACGAAGTCCGATGCTGAGAGCTTCCAATTCAGCAGCTAAAGTCATGAAGACAGAGTAA
ATCTAGCGGGAAAGAAAGTTATTTTACAGGCTGTTGTTGTTGTTGGGTCAGTTATAA
TTATGCAAACTTTGCAAAAATGGAATATCCTTCGACTGTTCCTTGGCCFGAAAACAGCT
TTAAGTGAAGCTGCAGGAAGTGAACGCTTTTACATTTCAAATGGATGCAGCTTCTGAT
AAGATCTTCACTTCATGCTTTTGTCCATTCCTGTGACTGGAATATTTGCTCCCTTCAT
TAAACAGGTTCTGAATGCTTCATCACAACCTCCAAGATCAGCTTCTCAGCTCACATGTG
CCGCCTGTCTTTTCTTTTCTATCTTCCCTCCAGCTTTTCCCCCCCTTTGTGAGCCT
TCGCCATCCCATCCAAGTCTTTTATCACAATTCGACCCACAGAAAAGAAATTCACAAG
ATATCAAAACAAAAATCTATATTTAATATGGGAGCAATTACAGAGCGAAGTTGGCTGGC
GGGGCCGTTGTACCCAGAGCGCGTGTTCATCAAAACAGGTCATTAGACCATGATGGAT
GTAAACCTATAAAGTATCTAAACTGGTCCCTTTAACAACCATGAGCAACACTATCATTT
CTCTAATAGAACCCTGCTGACCGTGTCAATTCGCCGCTGCCATTCGTATCTTTCTTGTGA
AATAATCAATAGCTGGCTGCTTTGAAATAAATAATAAAAAGTCATAGTAACCTACCTAA
GGAGCAACAAAAATGGATTTATGGAGCATCCAAGAGACTTGGGGCAGCATATATGGCACA
ACTATTTTAAAAATATCTACAATTTTGAAGATGCAGGATTTTGGAGCTTATTTTCATTCG
AATTAATAAAGAAGATTTTCAGTGGTTCGTAACACTATTGGGACAGCTTCACCTCGATTC
GAGGCTGATATACTCACTTCATGTGATCATTTTCTAATAAAGCACAATTTAGGAACATA
ATTTACACAACAGAAATTTGGGTTAGGGATAGAAAATACTTTAATGTTAATTTGACATACT
GTAGATCATCTGTCTGCAAAAGAGAGAAATAGGTGGAAAGTTACTCAGTGTTCANNNNNNN
NNNNNNNNNNNNNNNNNAGTATCAGCTGTATTAGGAAAGGCAGTAATTAACCTGCAG
TAACAGGATACTTAATTTGAGCTGCCACTACCTGAATAACACATGTTAATAACATGTT
TAATACTGTATGTCACAACCTGCAGACTGGAATATATGTGTGGAGGAGAGGGGGTAAAT
GTTGGAGAATTTAGTCTAGTAATCCATCAAAGTCGTGTGTTTTGGAATGCAGATTTTT
TCGGGGAAATTTTGTCTTCATGTGTTTCTTACGTGTGTGTCCTTACTTGCAGTAC
CCACTTAACCCACAGAGGGCGCTGTCCACCGCATTCCTGCAGCCAGAAGATTTT
AACAAGTCAATTTATATCATATGTCATACATAAAACGTTTGTAAAGGATGAATATCCA
```

CATCGATTAGAGAGGAATTAAGTCCACCGTGAGGAAGTGACCGCATGAAAAAAAAATTGAC  
TAATCAAAAAATAGAATTTGATCGTCATTTAGAGCTAAAAATAAAAATGGACCTTTTTTC  
AGATTATTTTTGCAAATCTGANNNNNNNNAGGCCTTTAGACGCCACATTT

>amplified\_fugu\_segment

TGGCTTTTGTCCATTTCTGTGACTGGAATATTGCTCCCTTCATTAACAGGTTCTGAATGC  
TTCATCACAACCTCCAAGATCAGCCTCTCTCAGCTCACATGTGCCCGCCGTCTTTTCTTT  
TCTATTTCTCCCTCCAGCTTTTTCCCCCCTCTTGTGAGCCTTCGCCATCCCATCCAAGT  
CTTTTATCACAATTCAGCCACAGAAAAAGATTCTCACAGATATCAAAACAAAAATCT  
ATATTTAATATGGGAGCAATTACAGAGCGAAGTTGGCTGCGCGGGCGGTGTCCACCAGA  
GCRCGTGTTTTTTCATCAAACAGGTCATTAGACCATGATGGATGTAACCTATAAAGTATC  
TAAACTGGTCTTTTAAACAAACCATGAGCAACACTATCATTTCTTAATAGAACCTGTG  
ACCGTGTTCATCCCGCTGCCATTCGTCATCTTTCCTTGTGAAATAATCAATAGCTGGCT  
GCTTTGAAATAAATAATATAAAAGTCATAGTAACTACCTAAGGAGCAACAAAAATGGAT  
TTATGGAGCATCCAAGAGACTTGGGGCAGCATATATGGCACAACATTTTTAAAAATATCT  
ACAATTTGAAGATGCAGGATTTTTGAGGCTTATTTTCATTGCAATTAATAAGAAGATTT  
CAGTGGTTCGTAACCTCAATGGGACACGCTCACCTCGATTCGAGGCTGATATACTCAC  
TTCATGTGATCATTTTCTAATAAAGCACAATTTAGGAACATAATTTACACACAGAATGT  
TGGGTTAGGGATA

>rCNE\_mouse\_sequence\_1645923

TCACTGCCAACCCATTCCCCACCAAAATGGAGTGTCTTATTTTGCTAACTGCTTAAACA  
TAAACTCCTGCAGNNNNNNNNNTTGTCCACAGCTCATATTTTTCATCATTGATCA  
TTAAATAGTATGGATATAAACCATAAAGATCCATAAAGTGGAGCTTTTAAACAATCCAG  
AGCAATGCTATCATTTTCTTAAATAGAACCCTGCTGACCGTGCCTTGACACAGACACTATTG  
TCATTTTCTCCACGCAATAATCAATAAGTTGGCTTGAATAAATAATATAACAGTCACA  
ATATATATCTTTCAGACTGGCTTTAGACTAACCTATAAACGGGACCAAAACAAGAAAGA  
AACTTTTACATAAATGTTAAAAAGTTATGAACATCACAGTTGGCCTA

>SCE\_mouse\_sequence\_1645954

GATCATTAATAGTATGGATATAAACCATAAAGATCCTAACTGGAGCTTTTAAACAAT  
CCACAGCAATGCTATCATTTCTTAAATAGAACCCTGCTGACCGTGCCTTGACACAGACACT  
ATTTGTCAATTTCTCCACGCAATAATCAATAA

FUGU HITS IN THE CONTEST OF MAMMALIAN rCNE

CLUSTAL W (1.83) multiple sequence alignment

```
ENSRNOG0000020637      TCACCACCACCCCAATCCCCACCAAAATGGAGTGTCTTATTTTGCTAACTGCTTAAACA
ENSMUSG0000040148      TCACTGCCAACCCATTCCCCACCAAAATGGAGTGTCTTATTTTGCTAACTGCTTAAACA
ENSG00000188620        TTGCCACTTCCCATGCCCCACCAAAATGGAGTATCTTATTTTGCTAACTGCTTAAACA
ENSCAFG0000012698      TTGCCCCACCCCACTGCCCCACCAAAATGGAGTATCTTATTTTGCTAACTGCTTAAACA
SINFRUG00000148199      -----

ENSRNOG0000020637      TAAAACTCCCAGNNNNNNNNNT--GTCCCCACAGCTCATATTTTTCATCATTGATCA
ENSMUSG0000040148      TAAAACTCCTGCAGNNNNNNNNNTTGTCCACAGCTCATATTTTTCATCATTGATCA
ENSG00000188620        TAAAACTCCAGAAGAAAAAAT---GTCCCCACAGCTCATATTTTTCATCATTGATCA
ENSCAFG0000012698      TATAACTCTAACAGAAAAAAT---GTCCCCGTGGCTCATATTTTTCATCATTGATCA
SINFRUG00000148199      -----GGTCA
                                     * **

ENSRNOG0000020637      TTAAATAGTATGGATATAAACCATAAAGATCCTAACTGGAGCTTTTAAACAATCCATG
ENSMUSG0000040148      TTAAATAGTATGGATATAAACCATAAAGATCCTAACTGGAGCTTTTAAACAATCCAG
ENSG00000188620        TTAAATAGTATGGATATAAACCATAAAGAACCATAAAGTAACTGAACTTTTAAACAATCCATG
ENSCAFG0000012698      TTAAATAGTATGGATATAAACCATAAAGAACCATAAAGTAACTGAACTTTTAAACAATCCATG
SINFRUG00000148199      TTAGACCATGATGGATGTAACCTATAAAGTATCTAACTGGTCTTTTAAACAACCATG
                                     *** *   *****   *****   *****   *****   *****

ENSRNOG0000020637      AGCAATACATCATTTCTTAAATAGAACCCTGCTGACCGTGCCTTGACACAGACACTATTTG
ENSMUSG0000040148      AGCAATACATCATTTCTTAAATAGAACCCTGCTGACCGTGCCTTGACACAGACACTATTTG
ENSG00000188620        AGCAATACATCATTTCTTAAATAGAACCCTGCTGACCGTGCCTTGACACAGACACTATTTG
ENSCAFG0000012698      AGCAATACATCATTTCTTAAATAGAACCCTGCTGACCGTGCCTTGACACAGACACTATTTG
SINFRUG00000148199      AGCAACACTATCATTTCTTAAATAGAACCCTGCTGACCGTGCCTTGACACAGACACTATTTG
                                     *****   *****   *****   * * *   * * *   * * *   * * *
```

```

ENSRNOG00000020637      TCAT-TTTCTCCACGCAATAATCAATAAGTTGGCTCGAAAATAAATAATATAACAGTCAC
ENSMUSG00000040148      TCAT-TTTCTCCACGCAATAATCAATAAGTTGGCTTGAAAATAAATAATATAACAGTCAC
ENSG00000188620         TCAT-TTTTCAGCACGCAATAATCAATAAGTTGGCTTGAAAATAAATAATATAACAGTCAC
ENSCAFG00000012698      TCAT-TTTTCAGCACGCAATAATCAATAAGTTGGCTTGAAAATAAATAATATAACAGTCAC
SINFRUG00000148199      TCATCTTTCCTTGTGAAATAATCAATAG-----
                        ****  ****      *  *****

```

```

ENSRNOG00000020637      AATATATTATCTTTTCAGACTAGCCTTAGACTAACCCATAAAAATGGGACTAAAAACAAGAAAG
ENSMUSG00000040148      AATATATTATCTTTTCAGACTGGCCTTAGACTAACCCATAAAAACGGGACCAAAACAAGAAAG
ENSG00000188620         AATATATTATCTTTTCAGACTGGCCTTAGACTAACCCATAAAAATGGGACTAAAAACAAGACAG
ENSCAFG00000012698      AATATATTATCTTTTCAGACTGGCCTTAGACTAACCCATAAAAATGGGACCAAAATAAGAGGA
SINFRUG00000148199      -----

```

```

ENSRNOG00000020637      AAACTTTACGTAAATGTTAAAAAGTTATGAACGTCACAGTTGGGCCTA
ENSMUSG00000040148      AAACTTTACATAAAATGTTAAAAAGTTATGAACATCACAGTTGGGCCTA
ENSG00000188620         AAACTTTACATGAATGTTAAAAAGTTAGAGACATCACAGTGAGGACTA
ENSCAFG00000012698      AAACTTTACATAAAATGTTAAAAAGTTAGGAACTTCACAGCGGGCCTA
SINFRUG00000148199      -----

```

# Fragment Pax3\_24781

Representation of conserved regions within their genic context

Within the mouse context is shown the rCNE from which the tested SCE is derived (red diamond)

Within the fugu context all CHAOS hits obtained from the mouse rCNE are shown (green diamonds, in red the one tested)

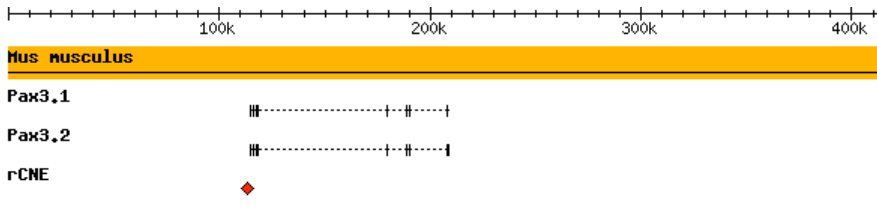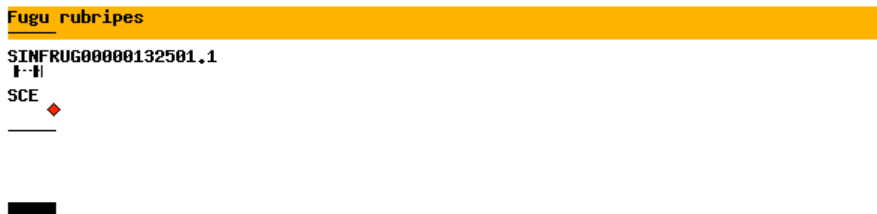

Conserved regions shown within 2000bp context

The mouse context contains:

-rCNEs green boxes, in red the one considered for this test

-SCEs yellow boxes, in red the one considered for this test

-CHAOS hits blue boxes, in red the one considered for this test

The fugu context contains:

-the fragment amplified in this test

-CHAOS hits blue boxes, in red the one considered for this test

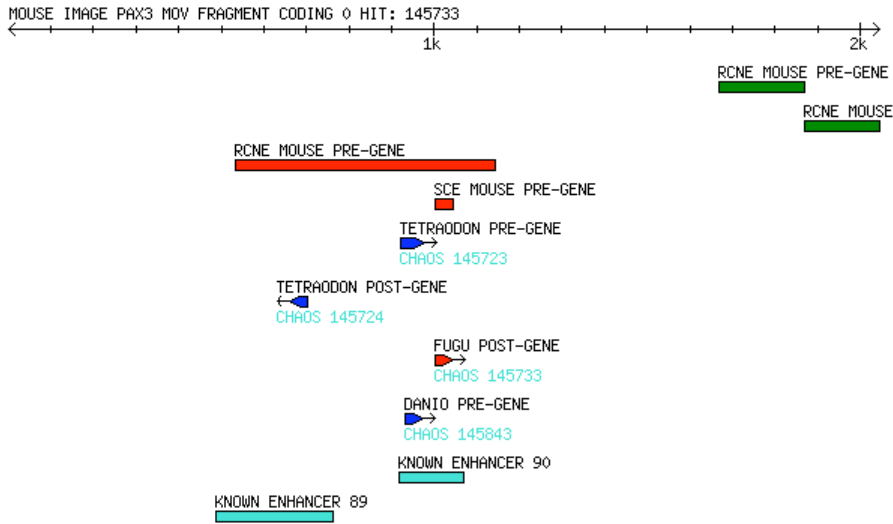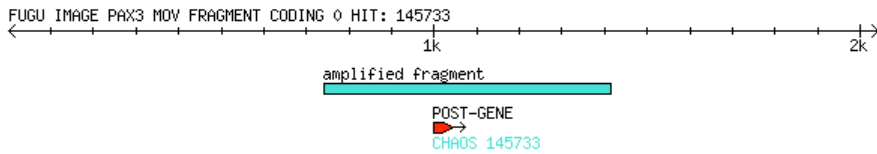

## SEQUENCES

```
>fugu_fragment_for_primer_design_24781
TCAGGGAGGTCAGAGGTGAGTCTGGGGTGACACCGCAGGCCTAATTTGAACATATCCGCTC
CCAGGTTGTGCCGTCCTCCGAGGGCATGTGCGGAGATGTTTCCTCTCCTCCCTCGTAAT
TAAATCTGTGTGTCATCCCTCCGCCCCGACAGCGCGGGATCCCATCGAGCCCGGG
ACGCGCAGCAGATCAGCGCTGCGTGAATTATACGCGGGGTTAGGTCACAATGTTGCCT
CATCAGTATGACACGACGCCCAAAGTTATAGAGTTAAAAACAACCCAAAACACACGCA
CGCGTGCACGCTCAGAGTTCTACCGCAGCAAAATCGAACGAACACATGACAACCTTGCCAA
CCTGAGGGGAAGACGCGGGGAAAGCTGTATGATAAATAGCTGGTTTGTATTCCTCCGAGG
GAAACACAAAATCAAATCTAAAAGTCACCTGTGCGTGACCGGTGCGGCATGTCCATCATT
TGAAATGATTCGTTTGGAGGAAAACACGGGCTGTGTTTTAAATAGGACGAATTGGGCAA
AAAAGGGTGTCTTATGGTCAAACCTTATGATAAATGACCTGTCTGCTTATTTGTCATCA
ACAGAAAAAAGTATCCAAAAATACCTTGCTGCTGTTCAAAAATAACATAGGCTATAGAGTAT
ATACTTTNNNNNNNGACATTTAAATGATAAAAATCTGCTTATGATCACAATAAGTCAC
ATTAGCTTATCTGCTTTCATGCATACCCCTGGGTAAAAGGCCCTTTTATAATTGGAAGA
ATAAATAAATCAGTTCTTCGTTNTGGCNAATGGCTAATGAAGCTGTGACTGTACCGCCC
CTGGTGGTCACGATGGCGTAGCACTAAAAGACTCCCATTTATGGACGGTTGTCCGCAT
CTACAGGTCGGCTGAGGTAATGTTCAACAGGAATGATTTGCTTTTACCAGTGACCTCT
GATTTGAGGAGTAAATGAAGCTCCCATATATCATTAGATTTGTTTATATATTTATAAGT
CAGTGTAGTCTGAAATGAGAATATGATGTATAAAATGAATTAATAATACGTTTATTTT
TCAAAAATTAACAGGTAACCATTAAGTTATAGTAATATATTTGTGGTTATCTCATAAAG
```

ACAGGGAAATAACAATGATAAAAAATAACAAACAATCAAATTTAGAAGACTTAGTTGATAA  
TTGTTTTTTCTTTAAAGATTGGCAATATTTGCTTTAAGCAACCAAGTGTACTTTAGGTTT  
TGGTAAATCCATATTGTTACTGTTTGGCTGTTACCGCAACATTTCTGTAATTCAGTTATC  
AATTTGGATTCAAATGAAATAATCAATTTCAATTTATGCACAGTTTCAGATTAATTAATTTAA  
AAAGGCATCTTTACTTACCGCTGTTTCAGCAGCGATTTTCAATTTTCTTCGTAAAACCTTT  
TCAATTTATGTGCAATTTAGCAGTCTGTTATCACTTCTACTCCTCAGACTATGTAATAA  
TCTAAGCATGTGCCCCCTGCTGTTAAAATGCCCTCACTGCACCATTATATCTGGTGTCT  
GCTATTTTAAATGACAGGAAATACACTCAAATGAAAAATGAACAATTTGGCTCTTTTCT  
TTCCAGGATAATCACTTTTAAATAATACACTTTTAAAGTAGGACACAGCTAAAATCAAGCT  
TGATGCCATAAATCTTTAATTTATGTCATCATTAAGAAGATTGGCCATACGAAAGCACA  
TTATCTGTTCAATAGAGTTCAATTTACAGAATCAGTTTGGNNNNNNNNNNNNNNNNNN  
NNNNNNNNNNNNNTGGGTTCAATTTTAAATGACACATAAAGCTTCCACCCTCAACAA  
TAGCAGGTTGAGCAATCGAGACAGATTTAAAAGTGCACCTGGTCACTCAGATTTAGAAAT  
GATCTCTATATGAGTTGAGNNNNNNNNNNNNNNNNNNNNNNNNNNNNNNNNNNNNNN  
NNNNNNNNNNNNNNNNNNNNNNNNNNNNNNNNNNNNNNNNNNNNNNNNNNNNNNNN  
NNN

>amplified\_fugu\_segment  
ATACCCCTGGGTTAAAGGCCTTTTTATAATTGGAAGAATAAAATAAATCAGTTCTTCGTN  
TGGCNAAATGGCTAATGAAGCTGTGACTGTACCGCCCCCTGGTGGTTCAGATGGCGCTAG  
CACTAAAAGACTCCCATTTATGGACGGTTGTCGCCATCTACAGGTCGGCTGAGGTACT  
GTTTCAAAGCAATGATTTGCTTTTACAGTGCACCTCTGATTTAGGAGTTAATGAAGCTC  
CCATATTTATCATAGATTTGTTTATTTATATTTATAAAGTCACTGATGCTGAAATGAGAA  
TATGATGTATAAAATGAAATTAATAATACGTTTATTTTCAAAAATTAACAGGATAAAC  
ATTAAGTTATAGTAATATATTTGTTTATCTCATAAAGCAGGGGAAATAACAATGATAA  
AAATAACAAAACAATCAAATTTAGAAGACTTAGTTGATAATTTGTTTTCTTTAAAGATTGG  
CAATATTTGCTTTAAGCAACCAAGTGTACTTTAGGTTTGGTAAATCCATATTTGTTACTG  
TTTGGCTGTACCGCAACATTTCTGTAATTCAGTTATCAATTTGGATTCAAATGAAATAAT  
CATTTTCAATTTATGCACAGTTTCAGATTAATTAATTTAAAAGGCATCTTTACTTACCGCT  
GTTTCAGCAGCG

>rCNE\_mouse\_sequence\_149451  
GTTTGCCTTAATTAGGGGTGGGCAAGTAGGATTGGGGCTGAGTTCACATCAAAACTG  
TCAAAGGAGATNNNNNNNNNAGGACATGGAGAGAGGGTTGGAGGATTCAGGGCAGGAA  
AAATCAAATATCATAAAAAGAAAAGGAACTTGAAGCCCAGAAAGTCAATTTGTTTCTTTA  
TTTCAAAGGGGAAAACCTGCCGTGATTCATCTTTTGAATGATTAAAGCCCTGAATA  
CCTCTCGGCCCCAGAGTGCAGTCCCCTGAATAGACTTGAAGGAAATAAAGAGCAGCGCAGA  
ACGTGGGGCTGGCACGGGAGGGGGGTAAAGGGAGGAGTGTTCGCTGGCACTTACCAAGT  
TATAAATAAAAAGGCTAGGCACAATGGTACTTCTCTAAGGACAGACAGTCTTTACACAC  
TCCTGGCGTCATATCTGCTGGGGACTTTCAGCTCCTAGCCAAGACGTTGCTTCTTTTA  
TTTTTCCAGCAGTTTAGTCTGAATGCCATAAATAATCTTGAAGAACAACGCTGCACCCG  
GGCAAACCTCAACATATAGATGCAAGTGCATCGGGGATGAATGTGTACGTGGAGATTTA  
AAGTCCCGCTT

>SCE\_mouse\_sequence\_149489  
TTGCTTCTTTTATTTTCCAGCAGTTTAGTCTGAATGCCATAATA

FUGU HITS IN THE CONTEST OF MAMMALIAN rCNE

CLUSTAL W (1.83) multiple sequence alignment

|                    |                                                             |
|--------------------|-------------------------------------------------------------|
| ENSG00000135903    | GTTTGCCTTAATTAGGGAATGGGGAAGTAGGGTTGGGGCCCGAGTTCAGTCAAACCTG  |
| ENSCAFG00000016041 | GTTTGCCTTAATTAGGGGTGGGGAAGTGGGGTTGGGGCC-GAGTTCAGTGAAGAACTG  |
| ENSRNOG00000013670 | GTTTGCCTTAATTAGGGGTGGGCAAGTAGGATTTGGGGTCTGAGTTCACATCAAACCTG |
| ENSMUSG00000004872 | GTTTGCCTTAATTAGGGGTGGGCAAGTAGGATTTGGGGCTGAGTTCACATCAAACCTG  |
| SINFRUG00000132501 | -----                                                       |
| ENSG00000135903    | TCAA--GGAGTGGGGGA--GGGGACAGAGAGAGAGAGTGGAGAATCCCTCCAGGGGC   |
| ENSCAFG00000016041 | TCAAAGGAGTTGGGGATGGGAAACTGAGAGAGGGGGTGGTGGAGAAC--TCTGGCCC   |
| ENSRNOG00000013670 | TCAAAGGAGATNNNNNNNAA--GGACATAGAAAGAGGGGTGGAGGAT----TCAGGGGC |
| ENSMUSG00000004872 | TCAAAGGAGATNNNNNNNNNAGGACATGGAGAGAGGGTGGAGGAT----TCAGGGGC   |
| SINFRUG00000132501 | -----                                                       |



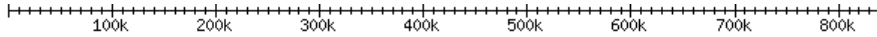

**Mus musculus**

Gata3.1

HH

rCNE

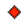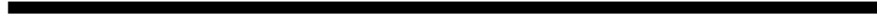

**Fugu rubripes**

SINFRUG00000129920.1

|

SCE

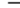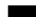

Conserved regions shown within 2000bp context

The mouse context contains:

- rCNEs green boxes, in red the one considered for this test
- SCEs yellow boxes, in red the one considered for this test
- CHAOS hits blue boxes, in red the one considered for this test

The fugu context contains:

- the fragment amplified in this test
- CHAOS hits blue boxes, in red the one considered for this test





TTTATTTTCATTCCTTTAATCTCACTCTGCATTCCTCCGAGATCACCCGGTTCCATTAATAC  
GAGTCTAAAATTAGCGAATNNNNNNNNCAACCGATAGTTTCAGCGGTTTATTTATTT  
ATTTTTTATATTCAGATGATTTAATCCCTGCTACGAATTGAAATCAGCAGGTTTGGTG  
CACAGTTGAACGCTGCATTTATTCAGCCTTTTGNNNNNNNNNNNNNNNNNNNNNNN  
N

---

>amplified\_fugu\_segment  
GGTATCTGTGCGCCTTTCTCGGTGGGAGCCACATGAAGCTCCGCTGTGCCTTGAACGGT  
TTCTGTCTAAACGCCACGAACTGAAATGCCAGTTAGTCTCCTATCAAAGCTGAAAAACA  
CTCTCTCGCCCGCACGCGTGGCGCAATTCCTCGTATCAGTGTGTTTTCGGAGC  
CACCTGCTTTACTTTTTATTCACCTGGCTTTAATTTAAACGCTAATTTTTTATCTCAAAG  
CGGACACGTTTTTGCATATTTCCCTACATGCAGTANNNNNNNNCGTTTTACTTCTCA  
ACAGTCGATCAGCCTCCCTTTCTGCAGAGGCAGATTTAAATATTTGTTTCAGATCGATTC  
TCGCTGCAAAATCAAATCTGT

---

>rCNE\_mouse\_sequence\_293208  
ACCTGTCTTATCCATCTTTAGACTGGAGTTATAATGGCATGGGACTCATGAGGTGCTG  
TATTTGAAAAGTCTTTGAAAGATAAGAAAATCCTTTTAATTTAAACAAAGATAATATCAT  
CTTCAATTATGCTTCTTTGATCTTTGTGGACTAGTGCATGCTGGGACTTGTAGTTCTG

---

>SCE\_mouse\_sequence\_293320  
TTGAAAGATAAGAAAATCCTTTAATTTAAACAAAGATAATA

---

FUGU HITS IN THE CONTEST OF MAMMALIAN rCNE

CLUSTAL W (1.83) multiple sequence alignment

```
ENSG00000107485      ---AGCCTCTTCTTATCCATCTTTAGATAAAAAGTTATAATAGTATGGGACTTAGGAAGT
ENSCAFG00000005019  CCCCTCCCCCTTCTTATCCATCTTTAAATTTGGATTTATAATGGTATGGGCCCTTATGATGT
ENSRNOG000000019336 ---ACCTTCTTCTTATTCATCTTTAGATTGGAGTTGTAATAGCATGGGACTCATGAGGT
ENSMUSG00000015619 ---ACCTTGTTCCTTATCCATCTTTAGACTGGAGTTATAATGGCATGGGACTCATGAGGT
SINFRUG00000129920  -----
```

```
ENSG00000107485      GCTGTGAGTGTGAAAAGCTCTTTGAAGATAAGCGAAT--TTTTTAAATTTAAATGAAG
ENSCAFG00000005019  GCTGGGAGTATTTGAAAAGCTCTTTGAAGATAAGAGAAT--TCTTTAATTTAAACGAAG
ENSRNOG000000019336 ACTG----TGTTTGAAACGGTCTTTGAAGATAAGAAAAT--TCTTTAATTTAAATGAAG
ENSMUSG00000015619  GCTG----TATTTGAAAAGTCTTTGAAGATAAGAAAAT--CCTTTAATTTAAACAAAG
SINFRUG00000129920  -----TTTGAGATAAAAAATTAGCGTTTAAATTTAAAGCCAAG
                        **  *  *  *  *  *  *  *  *  *  *  *  *  *  *  *  *  *  *  *  *  *  *
```

```
ENSG00000107485      ATACTATCATCTTCAATTATGTTTCTTTGATCTCTGTGGACCATTGCATGCCGGAAGTGT
ENSCAFG00000005019  ATATCATCATCTCCAATTATGTCCTTGTATCTGTGTGGACCAGTGCATGCTAGGACTTG
ENSRNOG000000019336 ATAATATCATCTTCAATTATGCTTCTTTGATCTTTGTGGACTAGTGCATGCTGGGACTTG
ENSMUSG00000015619  ATAATATCATCTTCAATTATGCTTCTTTGATCTTTGTGGACTAGTGCATGCTGGGACTTG
SINFRUG00000129920  TGAATA-----
                        *  *
```

```
ENSG00000107485      TAGTTTTGG
ENSCAFG00000005019  TAGTTTCTG
ENSRNOG000000019336 TAGTTTCTG
ENSMUSG00000015619  TAGTTTCTG
SINFRUG00000129920  -----
```

---

# Fragment Otx2\_13988

Representation of conserved regions within their genic context

Within the mouse context is shown the rCNE from which the tested SCE is derived (red diamond)

Within the fugu context all CHAOS hits obtained from the mouse rCNE are shown (green diamonds, in red the one tested)

10k 20k 30k 40k 50k 60k 70k 80k 90k 100k 110k 120k 130k 140k 150k 160k 170k 180k

## Mus musculus

Otx2.1

|||||

Otx2.2

|||||

rCNE

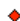

## Fugu rubripes

AAQ72465.1

H

SCE

◆

Conserved regions shown within 2000bp context

The mouse context contains:

-rCNEs green boxes, in red the one considered for this test

-SCEs yellow boxes, in red the one considered for this test

-CHAOS hits blue boxes, in red the one considered for this test

The fugu context contains:

-the fragment amplified in this test

-CHAOS hits blue boxes, in red the one considered for this test

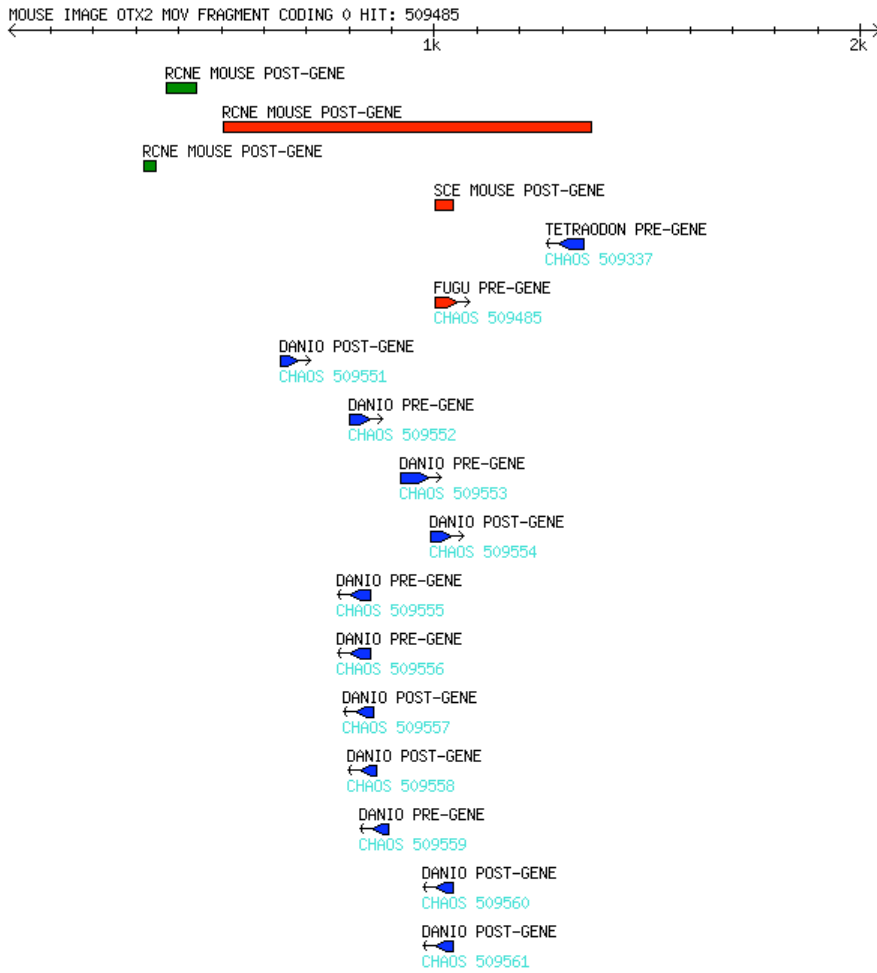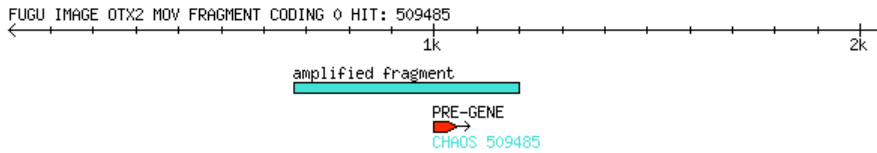

SEQUENCES

```
>fugu_fragment_for_primer_design_13988
GCTGGACCCTCAGTTCAGTCAAATGATGTGAGCAGGGTAAAGAGGCTGCGTGTGTTGGGC
ACCTAATATTCTGCAGAAATCCATCCTAACGACACAGATTTATGGAAATACACAGGACGC
AAATTGCGGGTCTCATCAGGATAATTGATCGAAACAGATGATGGAAGACGAAGCAGAGCT
CCGGTACATATGGTAATATAATTCACGAAAGTTGTAGGATACCTTTATGTATTTCCACAG
TAGTAGTTGAGGCCACAGGACACATTGTCCTTATTGCCCGAATTTCTACTGGAAACGATG
CATTTTTCGCTCTCACACAGATGAAAATGGAAGGNNNNNNNNCGTCAATGGGTGT
TCTAAAACAAATATATTCACGTAGGCCTGCTCTGGTCGAGGCCCTTCTCCCGATGTATAAA
ACCAGCACATTTATTTTCATATATTTTAAACGGCGGTTTGTAAATCCACTGACAGATTTAT
CCATTTACGCAACTATACTGCAGCCTTTGATAAACGGCCCTCACACAGCTCAAATATCTC
TCCGACCTTTAGCACTTAAAATCCCAATGAACAAAAAGAAACTCTTAAAAAACACTT
```

TATTTCCAGCAACAATTATTACAGAAAGACCCGAGGCGGAACCACTGCATCGATTAAACG  
TTGAGTTTATACAAATGACAGACGCACCTAAGTCGTTAGACAGACANNNNNNNNNNNN  
NNNNNNNNNNNNAACTATGAAGGAAGGAGGTTGTTATTGAGCGTTTCCCAAACCGG  
GTTTGTGTAAATGTGACAGATTGGGTTGAGGGGGTTAAAACCGTTGGTTATATTGAGGA  
GAAAAAAGAAGTGAACATAAFCAGACGCACAGTGGGGATGATTGGTGAGGTCAGTGA  
AGTTGAAGTGACAGCAATCACGAGGCACCACCGCATTTCTGCTTAATACCAGCCATTT  
TTTAACTTAAAAATCGAATTTCTGCGTCAGAAGTCGAATCATCTCGATCTTAAATTTAC  
TGATTTTCTGTGGAGTGAAGTACTGAATGATNNNNNNNNNNNNNNNNNNNNACTAC  
TACACTTTTACTACATTGATATGAGATATTTATTGTATTATCCAGTGGATCTAAATAAT  
ATATCTCTCTTTTCTGGAACAGGAGCCCGGTTGTAGCAGGGACCACAAAGAGAAT  
GAAGACCAAAAGTACATCGAGGAGATCCACCAGTTTCAAATTTCTCCAACCTCAGC  
CCTCAGACAAACATTTAGCATGXXXXXXXXXXXXXXXXXXXXXXXXXXXXXXXXXXXX  
XXXXXXXXXXXXXXXXXXXXXXXXXXXXXXXXXXXXXXXXXXXXXXXXXXXXXXXXXXXXTGGG  
TTTAAAGTCGAAATCGACAAGATTAAATAAACAAACACTAATGAAATTTATTGAATGT  
GGTTAGAAATAAAACGGAATGTTCGTTAAACCGTTTATGAAATTTTAAACAATTAAAGC  
AAATGGTAGAACAACAATTTGTTATTACCGCATGCTTCAATTAATGTTACACACTCT  
TGCGTATCTCTCAAAGCATGAATCGAATGGTTAAGACGTCGATCTGATTTACTGTG  
TACCTGTGTTGTTGTTGTTGTTGTTTATTAATTAACGTTCCATTTTTCGCACTTGATCAAAT  
GATACAATTCCTGAAATTCGCGTAATGATGGAATGTTCTTCTTATTTTATTGCTA  
AAATTAATTTGGTATTAAATTTNNNNNNNNCCCTAATAACTATTTTAAAGGTAGCGTCT  
AAAACACTACAGTTTAAATGCGTTTCAATTTGTCAGCAGCXXXXXXXXXXXXXXXXXXXX  
XXXXXXXXXXXXXXXXXXXXXXXXXXXXXXXXXXXXXXXXXXXXXXXXXXXXXXXXXXXX  
XXXXXXXXXXXXXXXXXXXXXXXXXXXXXXXXXXXXXXXXXXXXXXXXXXXXXXXXXXXX  
XXXXXXXXXXXXXXXXXTGAGTCCAAACCTCCGGATCTGTGTAGCAATGGCATCAAGCG  
CCCATTAGCGAC

---

>amplified\_fugu\_segment  
CAAATGACAGACGCACCTAAGTCGTTAGACAGACANNNNNNNNNNNNNNNNNNNNNN  
NNNACTATGAAGGAAGGAGGTTGTTATTGAGCGTTTCCCAAACCGGTTTGTGTAAA  
TGTGACAGATTGGGTTGAGGGGGTTAAAACCGTTGGTTATATTGAGGAGAAAAAAGAA  
GTCAACTAATCAAGACGCACAGTGGGGATGATTGGTGAGGTCAGTGAAGTTGAAGTGA  
CAGCAATCACGAGGCACCACCGCATTTCTGCTTAATACCAGCCATTTTAACTTAAA  
AATCGAATTTCTGCGTCAGAAGTCGAATCATCTCGATCTTAAATTTACTGATTTTCTG  
TTGAGTGAAGGTTACTGAATGATNNNNNNNNNNNNNNNNNNNNACTACTACATTTTAC  
TACATTGATATGAGATATTTATTGTATTATCCAGTGGATCTAAATAATATATCTCTCT  
TTTTTCTGGAACAGGAGCCCGGTTGTAGCAGGGACCACAAAGAGAAC

---

>rCNE\_mouse\_sequence\_478034  
GCCCACTGACCTACTTGCAATAGGGGAGGTAAAAATTTTCATTACCCCTCCCCCTAGAA  
TGTAGAGATCTTCAAAGGAACGCAGGAGGGGGTCAGCCTTTAAACCTAATTTCCCTA  
CCACTCCCTAAGCTTGGCCGTGCATCACAAATTTAGTCTTFACTTCCAAACATAGCGGC  
ACCAGGATCGTTGTCGGGTTGGCTTTTAAAACATCATTTATATGCAAAACCCAGCCAT  
TATTCATGCTGCTTAAACTATATTTGTAGTCTTTGATCATGCATAAGTAGACTCAAGTT  
AGCCGCTGGTAGAACGATGATATTGTTCTGCTTTGCTTTTAAAGGGCTCTCTAAGAGC  
TGGCTTCCAGAAATTTCCATTACTACGTTATAGTGTGCCTTTGTCTTTCAGTTGGTTTCA  
GACAACCTATTGCAATGCAAGTGAATAATTTCTGTTAGAAAAATCTGTTATGATATGG  
TTTGCCTAATCTATATTTATGCAATTTTAAAAATTAATGATTTTCAAATAATGAAAGA  
CGTGAATGGCAAAGAATGCTCGGGGAAGGAAAGGCATAGTCTGCTGATTTATTTGT  
TATTTCCACCCAGGCTGGCTTCTCCTCTCTCCCTCCCTTCTTATTTCCGTTTTCAGAAAT  
GCTTTATATTGGCTTCTCTTCCACACCTCCACTCCAGCAGGAAGATACTGACTGCTCC  
ACAAGTGGGGCCGAAAAATGGGGAGAAATCGGTTCTGAATAGCGGCACCAAAATGATTTG  
AAGTCTTTTCTAAATATATTTCAAGATTGAGTAATTAAGATTGCAAGCCCTTGGAAA  
TAAATAAAGCACCTTGTGAGTGT

---

>SCE\_mouse\_sequence\_478106  
TTATTGCATTTTAAAAATTACTGATTATTTCAAAAATTGAAAGA

---

FUGU HITS IN THE CONTEST OF MAMMALIAN rCNE

CLUSTAL W (1.83) multiple sequence alignment

|                   |                                                              |
|-------------------|--------------------------------------------------------------|
| ENSRNOG0000013406 | GCCCACTGACCTACTTGCAATAGGGGAGGTAAAAATTTTTCATTACCCCTCCCCCTAGAA |
| ENSMUSG0000021848 | GCCCACTGACCTACTTGCAATAGGGGAGGTAAAAATTTTTCATTACCCCTCCCCCTAGAA |
| ENSG00000165588   | GCCCACTGACCTAATGCAATAGAGGTGTTAAAAATTTTTCATTACCGTCTCCCCAGAA   |
| ENSCAFG0000015216 | GCCCACTGACCTAATGCAATAGGGGAGGTAAAAATTTTTCATTACCCCTCCCCAGAA    |

SINFRUG00000151879 -----

ENSRNOG0000013406 TACAGAGATCTTCAAAGGGAACGCAGGAGGGGGTCAGCCTTTTAAACCCTAATTTCCCTA  
ENSMUSG0000021848 TGTAGAGATCTTCAAAGGGAACGCAGGAGGGGGTCAGCCTTTTAAACCCTAATTTCCCTA  
ENSG00000165588 TATAGAAATCTTCAAAGGGAACCCAGGAGGGAGGTAGCCTTTTAAACCCTAATTTCCCTA  
ENSCAFG0000015216 TATAGAAATCTTCAAAGGGAACCCGGGAGGAGGTAGCCTTTTAAACCCTAATTTCCCTA  
SINFRUG00000151879 -----

ENSRNOG0000013406 CCACTCCCTACGCTTGGCCGTGCATCACAATTTAGTCTTTAGTCTCCAAACGTAGCGGC  
ENSMUSG0000021848 CCACTCCCTAAGCTTGGCCGTGCATCACAATTTAGTCTTTAGTCTCCAAACGTAGCGGC  
ENSG00000165588 CCACTACCTACGCTTGGCTGTGCATCACAATTTAGTCTTTAGTCTCCGAACATAGTGGC  
ENSCAFG0000015216 CCACTACCTCGGCTTGGCTGTGCATCACAATTTAGTCTTTAGTCCGCAACATAGTGGC  
SINFRUG00000151879 -----

ENSRNOG0000013406 ACCAGGATCGTTGTCGGGTTTGGCTTTTAAACATCATTTCATATTGCAAACCCGGCCAT  
ENSMUSG0000021848 ACCAGGATCGTTGTCGGGTTTGGCTTTTAAACATCATTTCATATTGCAAACCCAGCCAT  
ENSG00000165588 ACCAGGATCGTTGTCGGGTTTGGCTTTT--AAAAATCATTTCATATTGTAACCCGGCCAT  
ENSCAFG0000015216 ACCGGGATCGTTGTCGGGTTTGGCTTTT--AAAAATCATTTCATATTGTAACCCAGCGAT  
SINFRUG00000151879 -----

ENSRNOG0000013406 TATTCATGCTGCTTAAACTATATTTGTAGTCTTTGATCATGCATAAGTAGACTCAAGTT  
ENSMUSG0000021848 TATTCATGCTGCTTAAACTATATTTGTAGTCTTTGATCATGCATAAGTAGACTCAAGTT  
ENSG00000165588 TATTCATGCTGTTTAAACTATATTTGTAGTCTTTGATCATGCATAAGTAGACTCAAGTT  
ENSCAFG0000015216 TATTCATGCTGTTTAAACTATATTTGCAGTCTTTGATCATGCATAAGTAGACTCAAGTT  
SINFRUG00000151879 -----

ENSRNOG0000013406 AGCCGCTGGTAGAACGATGATATTTGTTCTC--TGCTTCGCCTTTTAAAGGGCTCTCTAAGA  
ENSMUSG0000021848 AGCCGCTGGTAGAACGATGATATTTGTTCTC--TGCTTCGCCTTTTAAAGGGCTCTCTAAGA  
ENSG00000165588 AACTGCTGATAGAAATGATGATATTTGTTCTCCATGNNNNNNNNNNNNNNNNNNNNNNNN  
ENSCAFG0000015216 AACTGCTGATAGAACGATGATATTTGTTCTCGCTTTCTTTTCTTTTCTTCCCTGTCT  
SINFRUG00000151879 -----

ENSRNOG0000013406 GCTGG-----CTTCCAGAAATTCATTACTACATTATAGC  
ENSMUSG0000021848 GCTGG-----CTTCCAGAAATTCATTACTACGTTATAGT  
ENSG00000165588 NNNNNAAGGACCCGTACCCAAGAGCTGGCCCTAAGAAATTCATTACTACATTACAAC  
ENSCAFG0000015216 TTAAG---GACCTGTGCCTAGGAGCTGGCATCCAGAAATTCATTACTCCATTACAAC  
SINFRUG00000151879 -----

ENSRNOG0000013406 GTGCCCTTTGCTTCCAGTTGGTTTCAGGACAACCTATTTGCATGACAAGTAAATAATTC  
ENSMUSG0000021848 GTGCCCTTTGCTTTCAGTTGGTTTCAGGACAACCTATTTGCATGACAAGTAAATAATTC  
ENSG00000165588 ATGCCCTTTGTTTTTAAATTTGTTTCAGGACTACCTATTTGCATGACAAGCAACATAATTC  
ENSCAFG0000015216 GTGCCCTTTGTTTTTAAATTTGTTTCAGGATTACCTATTTGCATGACAAGCAACATAATTC  
SINFRUG00000151879 -----

ENSRNOG0000013406 GTTGGNNNNNNNNNCTGTTATGTGTATGGTTTGCCTAATCTGTATTTATTCATTTTTA  
ENSMUSG0000021848 GTT---AGAAAAATCTGTTATGTATATGGTTTGCCTAATCTATATTTATTCATTTTTAA  
ENSG00000165588 GTT---AGCAAAATCTGTTGTGTGTATGTATGAGCAATCTATATTTATTCATTTTTAT  
ENSCAFG0000015216 GTC---AGAAAAATCTGTTGTGCGTATGCTATGCATAATATATATTTATTCATTTTTAT  
SINFRUG00000151879 -----TCATCTCGATCTTA  
\* \* \* \* \*

ENSRNOG0000013406 AAATTAAGGCA--TAGTCACTGCTGATTATTGTTATTTCCGCTCAGGCTGGCTTCTCCTCTC  
ENSMUSG0000021848 AAATTAAGGCA--TAGTCGCTGCTGATTATTGTTATTTCCACCCAGGCTGGCTTCTCCTCTC  
ENSG00000165588 GGAGAGAGTAGTAGTCAATTGCTGATTATTGTTATTTGAGCACAGGCTGGTTCTCCTCTC  
ENSCAFG0000015216 GGGGAGAGTAGTAGTTCGCGGCTGATTATTGTTATTTGACCCAGGCTGGTTCTCCTCAC  
SINFRUG00000151879 -----

ENSRNOG0000013406 CTTCCTCCCTTCTATTTCTGTTTCAGGAGTCCCTTTATATCGGCTTCCCTTCCACGCC  
ENSMUSG0000021848 CTTCCTCCCTTCTATTTCTGTTTCAGAGTGTCTTTATATTTGGCTTCCCTTCCACACC  
ENSG00000165588 CTTCCTCCCTTCCATTTTCTTCAGGAGTCTTCTTATCAGCCACCCCTTCCACACC  
ENSCAFG0000015216 CTTCCTCCCTTGCATTTTCTTCAGGAG---CTTCTGGGGGCCACTCTTCTCTGCACC  
SINFRUG00000151879 -----

ENSRNOG0000013406 TCCATTCCAGCAGGAAGATACCGTACTGCCACGAGTGGGGCCGAAAAATGGGGAGAAA  
ENSMUSG0000021848 TCCACTCCAGCAGGAAGATACTGTACTGCCACAAGTGGGGCCGAAAAATGGGGAGAAA  
ENSG00000165588 TCATTCCAGCAGGAAGATACTGTACTGCCACGAGTGGGGCTGAAAA--TGGGGCAAAA  
ENSCAFG0000015216 TCCTTCCAGCGGGAAGACAGAACCTCCAGGAGTGGGGCTGCAAAA--TGGGGCAAAA  
SINFRUG00000151879 -----

ENSRNOG0000013406 TCGGTTCTGAGTAGCGCCACCAATAGATTGAAGTGCCTGTCTAAATGTAATTCAGATT

```

ENSMUSG00000021848   TCGGTTCTGAATAGCGGCACCAAAATAGATTGAAGTGCTTTTCTAAATATATTTCAAGATT
ENSG00000165588     TAGGTTTTGAATAGCAGCGTCAAATAAATCAAGTGCCTTTCTAAATATATTTCAAGATT
ENSCAFG00000015216   TAGGTTTTGAATAGCAGCGTCGAATAAATCAAGTGCCTTTCTAAATATATTTCAAGATT
SINFRUG00000151879   -----

```

```

ENSRNOG00000013406   GAGTAATTAAGATTGCAAGGCCCTTGGGAATAAATACAGCACCTTGTGAGTGCT
ENSMUSG00000021848   GAGTAATTAAGATTGCAAGGCCCTTGGGAATAAATAAAGCACCTTGTGAGTGCT
ENSG00000165588     AAGTAATTAAGGAGTGTAAGCACCTGGAAAAAATAAAGTCCATGTAAGTGCT
ENSCAFG00000015216   AAGTAATTAAGGATTGTAAGCACCTGGAAA-AAATAAAGTACCACGTAAGTGCT
SINFRUG00000151879   -----

```

## Fragment Jag1\_16407

Representation of conserved regions within their genic context

Within the mouse context is shown the rCNE from which the tested SCE is derived (red diamond)

Within the fugu context all CHAOS hits obtained from the mouse rCNE are shown (green diamonds, in red the one tested)

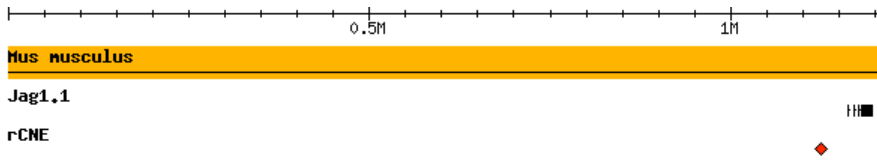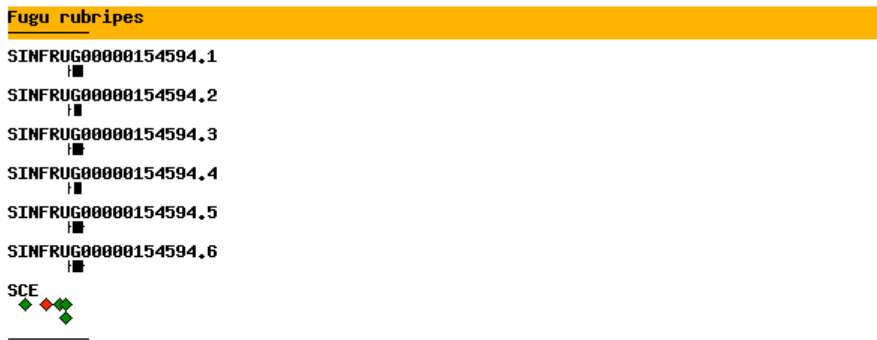

Conserved regions shown within 2000bp context

The mouse context contains:

-rCNEs green boxes, in red the one considered for this test

-SCEs yellow boxes, in red the one considered for this test

-CHAOS hits blue boxes, in red the one considered for this test

The fugu context contains:

-the fragment amplified in this test

-CHAOS hits blue boxes, in red the one considered for this test

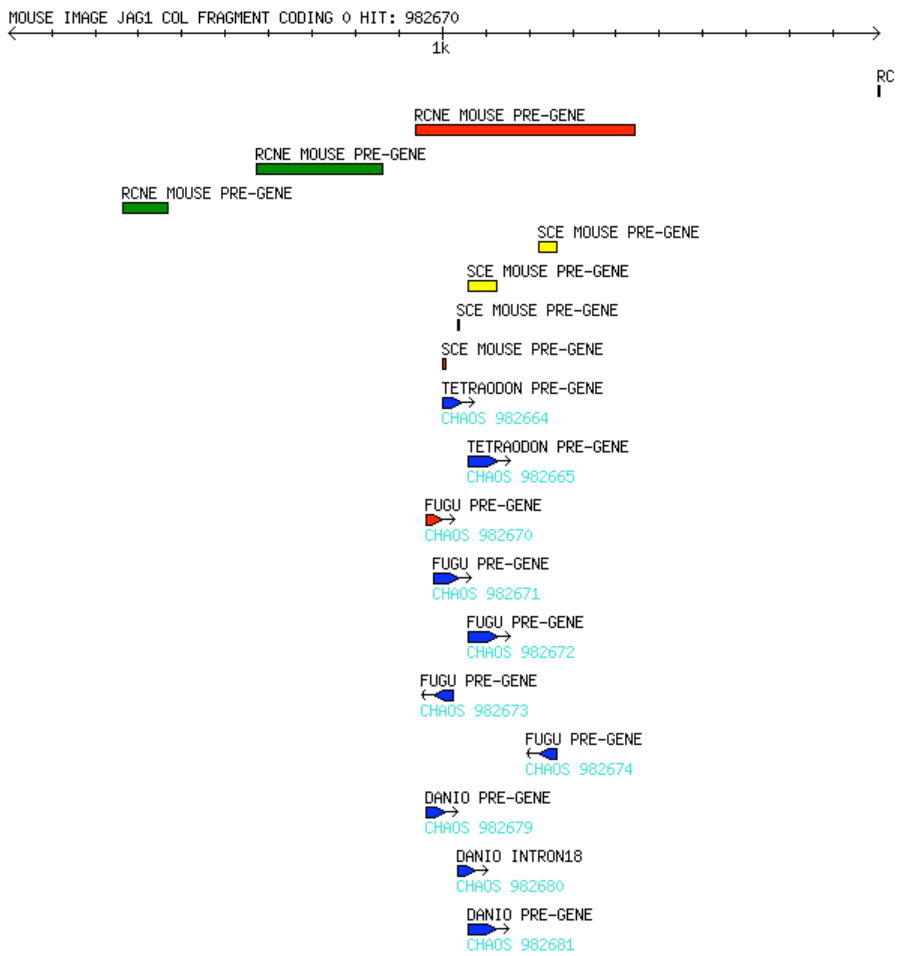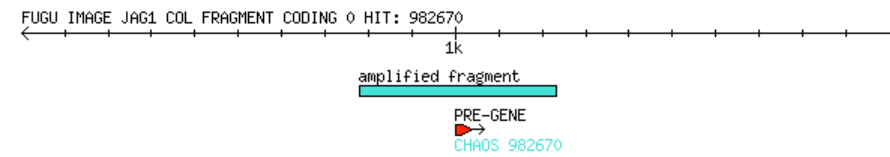

## SEQUENCES

>fugu\_fragment\_for\_primer\_design\_16407



CACATTTGGTTCATGCTGAAGCCATATTGAGCCAAATTTGAAGCCAGATTGAGACGCTTG  
TTCAGTAGTCTCTCTTTAAAGATGCCAATTTGCAAAACATGTATTTTTGGGAGGCCAAATA  
TCCAGATAGATCATTACGTCAGGTGACATCAGGTGACATGATGCATAAATGATGAAAAG  
GACAGACAATCACCACCAGAAATCCATGAAATCAGAAACTCATTTCAGCTGCTCTTGC  
TTTTGCCATCATTTTACAAACTTCCAGGCTTTTGTGACTCACATGGAAACCAATTTGTGTTA  
AGCCGAATGTCGCGACATGATGCAAGAGACCACCAGTCTGCCGTGTACTGATCCATC  
CAGTGTAGCCCGAAAATGACATGGCACCACATTCAGGACCTCCGCTGTTGTTGATGAG  
TGCTCTGCGCAGTNNNNNNNNNACTCCCTTCAAACGTGCCAATACAGACAATCTCTCGC  
ACACTCACCTTACACTATTTCCTTGCAGCAACATGCTCAAATACCAACCACACTGAGTT  
AAATGGAGGTTAAATAGAGGCTATTAATGTCACACCTGAGTGAACCTCCATAATGTAAG  
CAACCTTACCACCTCCAGAAAAGACTATGTGTTTAGTAATTTACTGGATTTAATAACAT  
TTATTGAAACCCCTGGACCTGCACTGACCTCCCTTAAATGTCAGCATGGGCCCAAGATG  
TTGGTGACTTAAAGGTGCTGGCCTGTAAACAAGAACAGAAAAACTCCCTGCAATGAA  
GACTCTTTTGGTGGCCTCTTCTTCCACAGAGGCTTGGCAAAGGTGAAGTGTACTAAAGA  
GGATATAGCTTGGGCATAATTTGGGAGCTGCTATGGGTACGGAGCTGTACATTTGCTAA  
GCACATCTCAGTGTTCATTTATTCCTCCGCTGTTAAATGCCATGGCAACCCCAAGCAT  
GGACTTTAATGAAGCTGAGATGGACATGTTGCACTACTCCCTTCCGTAAGTTTACAG  
TGTCACAACCACATCTCCCTTAAAGCCAGGGGAAAGTACGCCATACGCTAACAAAAATA  
CTCATACTGCTGTGGAAGAAAAGATGGATTTTGGTGTATTTTTCAGATAAATTTTGAA  
GATTACAATGTTGTGCATCAACAGAAAAAATTTATTGCTCCACATTTGATAGCAATTA  
GCTCAACACACAGAGACCATCACCTCTTGAGTTGTGCTAATCAGCCACACAGGCATCTG  
TATCTGCCAGGCTTACGCGCCGCCAGCTAATGGATCCGTACTTTATCACATGATTCT  
CCCTGTAAGGCCAGCCCTCTGCAAAACACCCACCTCCCTTCACTCATATGGCCT  
TGATGAGATCCAGACTCTGTGTGGAAGCATATTAAGTGGCCCAACAGTCTGCAGGGG  
AGCTAAATGGAAGGTAGTGAATCTTTTGAACCTCTGTACGTTACAGCAGTCTAAACA  
CATCCAGCTGAGTCTAAAGTTCAGGGAAGACATAAAGCACCATCGCACGTTACCTAAAG  
GATGATAATAGCGAGCCCACTAAAACACTAAGACAGTCTACAATCAAAGGGCCGAGA  
GGAAGGACTCCCTGCCCTTCTTACTGGCTGCTAATGGCTGTGTGTGTAAGAGACAGCCT  
ATCGTTATATCTTCTATAACACACACTCCGTGTGTGGGTGTTGGTGATTAACCTCCATT  
AACTCTGGCTTAATTAGAATACAAAAGACTTAGAAGAGCAGTAATACCTTGTGCCGGCC  
AGGTAGGTCACCTTTTAAAGCAAATACAGTGTACTGATTTGATGGGTCGTGTTGTGAGT  
TCATGGCTGCCAGATGTTATTTTTTCTTACAAAGATGGCTGACATGACAAAAAGCTTGT  
TTTTTAGCCTTGTACAGAGGAGATTATCTGGACAGTGTACTGAACGCTCGGTAAGACA  
GGCNNNNNNNNNNNNNNNNNNNNNNNNNNNNNNNNNNNNNNNNNNNNNNNNNNNNNNNN

---

>amplified\_fugu\_segment

AAGACTCTTTTGGTGGCCTCTTCTTCCACAGAGGCTTGGCAAAGGTGAAGTGTACTAAA  
GAGGATATAGCTTGGGCATAATTTGGGAGCTGCTATGGGTACGGAGCTGTACATTTGCT  
AAGCACATCTCAGTGTTCATTTATTTCCCGTGGTTAAATGCCATGGCAACCCCAAGC  
ATGACTTTAATGAAGCTGAGATGGACATGTTGCACTACTCCCTTCCGTAAGTTTAC  
AGTGTCCAACACATTTCTCCCTTAAAGCCAGGGGAAAGTACGCCATACGCTAACAAAA  
TACTCATACTGCTGTTGGAAGAAAAGATGGATTTTGGTGTATTTTTCAGATAAATTTG  
AAGATTACAATGTTGTGCATCAACAGAAAAAATTTATTGCTCCACATTTGATAGCAAT  
TAGCTCAACACACAGAGACCATCACCTCTTGAG

---

>rCNE\_mouse\_sequence\_907951

AAAAGATCTGGCCTTCAGAAAGCTTCTCATTAAAACTAATCTGTTCCACCACATCTTT  
CCAAGACACAGCGATCAGCATTGGAGCTGGCTTGAATGGCCAGGCCTAGTAAGACTGATA  
CAAACAGCTTAAGTAATGGATGCTATATGGGATTGAATGCTGACACAAAAAGATAGC  
CATCTCTATTGACACCACAAAGCTTTGTTCCAGCAACGAATTCATTACGCAATGCCCTTA  
GAGGCTCTGGACCCAGGGAGAAATGACAGACCTGAGACACAAAACTGAGCCAGCTGAT  
GAGCCAGAGACAGAGGCTATGCAATTCAAAAAGTTAATTCAGCGAACAAAGGCAGCA  
GACGATGACTGTTGAATCATTACATAATCATTACTGCACTAGTCTCCAGTTCACAG  
CCAAGGTTGGCGGTGCGGCTGCTTCTCATTCTGACCATGTACTCCCTGCTCGACTTCCAC  
GTGCAAGCTACTGTACACGCTCTCT

---

>SCE\_mouse\_sequence\_908243

CAAGAC

---

FUGU HITS IN THE CONTEST OF MAMMALIAN rCNE

CLUSTAL W (1.83) multiple sequence alignment

|                    |                                                              |
|--------------------|--------------------------------------------------------------|
| ENSMUSG00000027276 | AAAAGATCTGGCCTTCAGAAAGCTTCTCATTAAAACTAATCTGTTCCACCACATCTTT   |
| ENSRNOG00000007443 | AAAAGATCTGGCCTTCAGAAAGCTTCTCATTAAAGCACTAATCTGTTCCACCACATCTTT |

```

ENSCAFG0000005627      AAAAGATCTGGCCTTCAGAAAGCTCTCATTAAAGCGCTAATCTGTTCCACCACATTCTT
ENSG00000101384      AAAAGATCTGGCCTTCAGAAAGCCTCTCATTAAAGCGCTAATCTGTTCCACCACATTCTT
SINFRUG00000154594      -----CCCTTCGGTAAAGTTTACAGTGTCCAACCACATTCTC
                        **  ****   **   *** *  *****

ENSMUSG00000027276      CCAAGACACAGCGATCAGCATTGGAGCTGGCTTGAATGGCCAGGCCTAGTAAGACTGATA
ENSRNOG00000007443      CCAAGACACAACAATCAGTGTGGAGCTGGCTTGAATGGCCGGCCTAATAAGACTGATA
ENSCAFG00000005627      CTGAGACACAGCGATCAGCATTCTAGCCGGCCTCAATGGCTCGTCTAATAAGACTGATA
ENSG00000101384      CCAAGACACAGCGACCAGCATTCTAGCCAGCCTCAATGGCCAGCCCTAATAAGACTGATA
SINFRUG00000154594      CC-----
                        *

ENSMUSG00000027276      CAAACAGCTTAAGTAATTGGATTGCTATATGGGATTGAATGTCTGACAACAAAAGATAGC
ENSRNOG00000007443      CAAACAGCTTAAGTAATTGGATTGCTATATGGGATTGAATGTCTGACAACAAAAGATAGT
ENSCAFG00000005627      GAAATAGCTTAAGTAATTGGATTGCTATATGGGATTGAATGTCTGACAACAAAAGATAGC
ENSG00000101384      GAAACAGCTTAAGTAATTGGATTGCTATATGGGATTGAATGTCTGACAACAAAAGATAGC
SINFRUG00000154594      -----

ENSMUSG00000027276      CATCTCTATTTCGACCACCAAGCTTTGTTCCAGCAACGAATTCATTAGCAATGCCCTTA
ENSRNOG00000007443      CATCTCAATTCGACCACCAAGCTTTGTTCTAGCAATGAATTCATTAGCAATGCACCTTA
ENSCAFG00000005627      CATCTCTATTTCGACCACCAATCTTTGTTCCAGCAATGAATTCATTAGCAATGCACCTTA
ENSG00000101384      CATCTCTATTTCGACCACCAATCTTTGTTCCAGCAATGAATTCATTAGCAATGCCTTA
SINFRUG00000154594      -----

ENSMUSG00000027276      GAGGCTCCTGGACCCAGGGAGAAATGACAGACCTGAGACACAAAAGCTGAGCCAGCTGAT
ENSRNOG00000007443      GAGGCTCCTGGGCCAGGGAGAAATGACAGACCTGGGACACAAAAGCTGGCCAGCTGAT
ENSCAFG00000005627      CAGGCTCCTGGGCCAGGGAGAAATGACAGACTAGGGACACAAAAGCTAGCCAGCTGAT
ENSG00000101384      GAGGCTCCTGAGCCTGGGCAGAAATAACAGACTGGGGACACAAAAGCTAGCCAGCTGAT
SINFRUG00000154594      -----

ENSMUSG00000027276      GAGCCAGAGACAGAGGCTATGCAATTCACAAAAGTTAATTACAGCGAACAAAGGCAGCA
ENSRNOG00000007443      GAGCCAGAGACAGAGGCTATGCAATTCACAAAAGTTAATTACAGCGAACAAAGGCAGCA
ENSCAFG00000005627      GAGCCAGAGACAGAGGCTGCAATTCACAAAAGTTAATTATGGTGAACACCAGCAGCA
ENSG00000101384      GAGCCAGAGACAGAGGCTGCGCAGTTCCAAAAGTTAATTACAGTGGACAAAGGCAGCA
SINFRUG00000154594      -----

ENSMUSG00000027276      GACGATGACTTGTGTAATCATTACCATAATCACATTACTGCCTAGTCTCCAGTCCCAG
ENSRNOG00000007443      GACGATGACTTGTGAGTCATTACCCTAATCACATTACTGCCTAGTCTCCAGTCCCAG
ENSCAFG00000005627      GACATGACTTGTGTAATCATTACCATAATCACATTACTGCCTAGTCTCCAGTCCCAG
ENSG00000101384      GACGATGACTTGTGTAATCATTACTATAATCACATTACTGCCTAGTCTGAAAGTCCCAG
SINFRUG00000154594      -----

ENSMUSG00000027276      CCAAGGGTGGCGGTGCGGCTGCTTCTCATTCTGACCATGTACTCCCTGCTCGACTTCCAC
ENSRNOG00000007443      CCAAGGGTGGCGGTGCTGCTTCTCATTCTGACCATGTACTCCCTACTCATCTTCCAC
ENSCAFG00000005627      CCAAGGGCGGTGTTG--GCTACTTCTCATTCTGACTCTGTCTTCATCCTCATTGGCCAC
ENSG00000101384      CCAAGG-TGGCATTG--CTGCTTCTCATTCTGCCCATGTACTTCACTCATTTGCCAC
SINFRUG00000154594      -----

ENSMUSG00000027276      GTGCAAGCTACTGTACACGCTCCT-
ENSRNOG00000007443      CTACAAACACATG---GTGCT---
ENSCAFG00000005627      CTGCAATCTTCTGTACATGACTTCTT
ENSG00000101384      CTGCAATTTACTGTGTGACTTCT-
SINFRUG00000154594      -----

```

## Fragment Jag1\_16408

Representation of conserved regions within their genic context

Within the mouse context is shown the rCNE from which the tested SCE is derived (red diamond)

Within the fugu context all CHAOS hits obtained from the mouse rCNE are shown (green diamonds, in red the one tested)

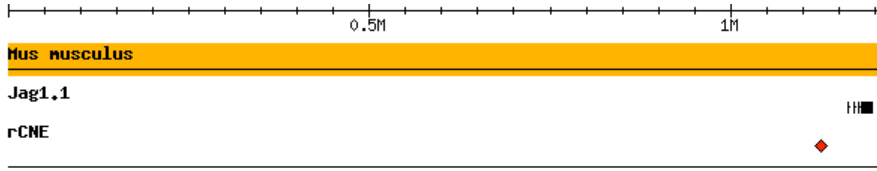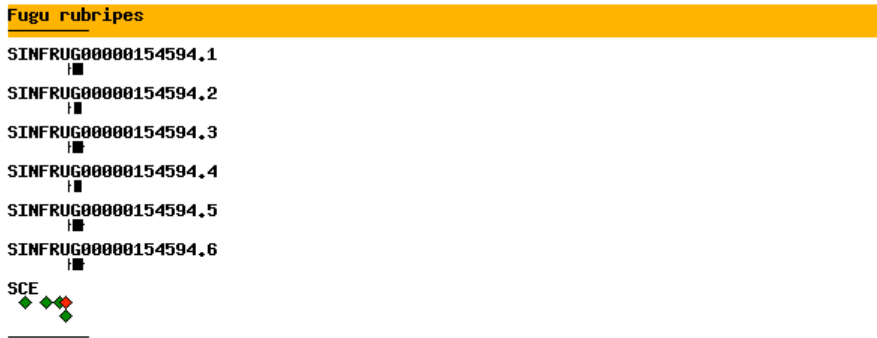

Conserved regions shown within 2000bp context

The mouse context contains:

- rCNEs green boxes, in red the one considered for this test
- SCEs yellow boxes, in red the one considered for this test
- CHAOS hits blue boxes, in red the one considered for this test

The fugu context contains:

- the fragment amplified in this test
- CHAOS hits blue boxes, in red the one considered for this test

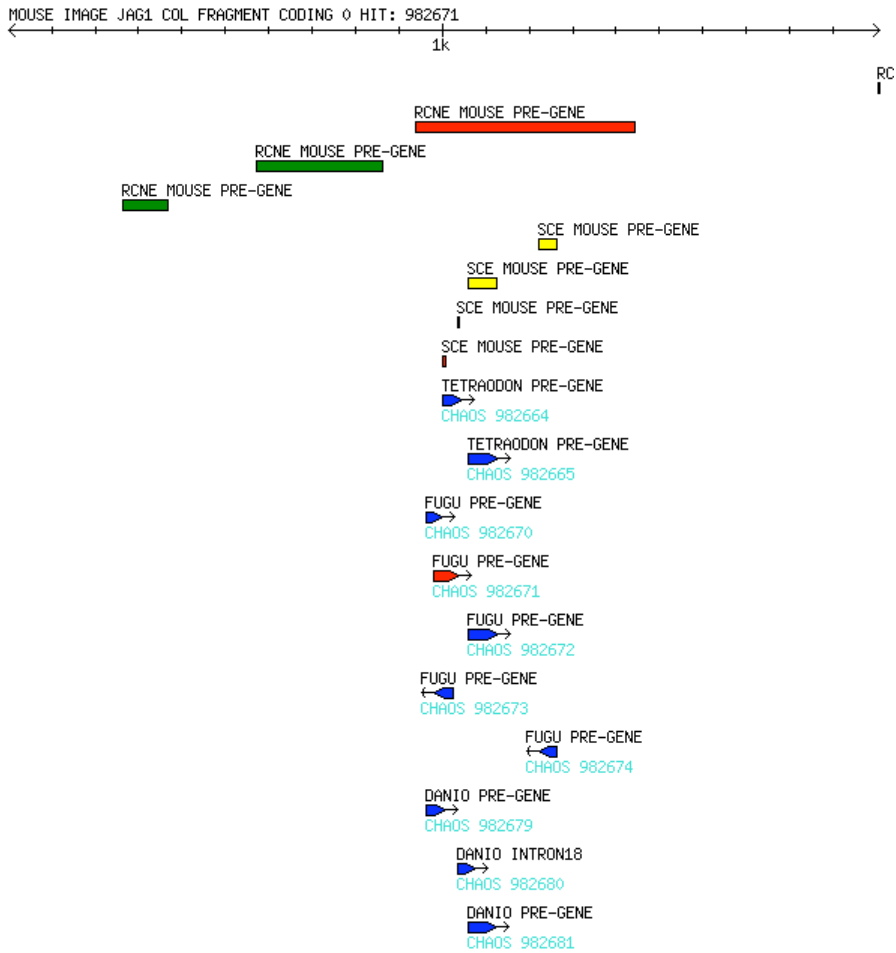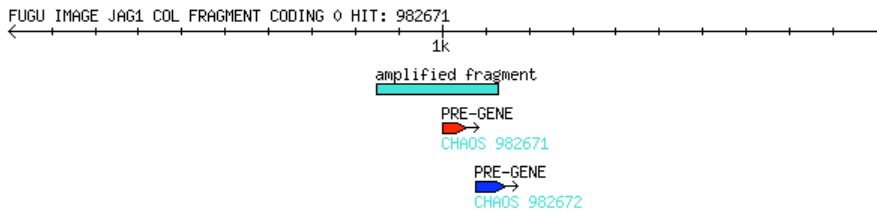

## SEQUENCES

```
>fugu_fragment_for_primer_design_16408
GGACTCTAATATCCCTGAACCAAGAGTGAGGTACCCACAGCAAGACATAAAAAACACCATCA
CCTACCAGAAATAGGCTCTCAAACAGATGGTGGGATAACAAAGCCGACCTTTTACAGT
GGAAAAATAATTTATCTAAGTGCCGACGGCTGATACCACCTGTAACACTTTTGTAAAG
GCAGTTCCTGTAAACATGGCGTGTAAACTCTGAAGCTTTTAAATGACTCAAACATGAAC
CGAGACTCGCACCTCCTCACCTTACACTGCGTTCCTTCGGATATCTCAGACATTCCTT
GACCTCCGCTCAGAAACAAGGACTTTATGGAAAACTCAGACTTCTCACAGGAAGATGT
TGCCTTGTGCCAACTTGACTTCTCCTCTCAGTATTTCTGTATTAGCCTGATCTATTCTT
TCTACCCTCAACAGGGATTTACAGTTCGAACCTGACCTGCAGCAGATACTGAAGGTT
```

GAGCCATCGTGGTCCGCTGATGCCAGCTGAGGCCAAAGTTTGCACAGTAGCAAAGAAAAG  
ACAACACACAGTCCCACCTCAAGATACTACCTCACAACTGCACACAAGCCCTGTAAAGG  
TCAGAGGTCATCATTATCAAGCACCCTCTGTAACCTGCTGTTTTCAAAGATAAAATCCTCTC  
CTTTTAGGAAAAAGGGCTATCAGCATTCATGGAGAACTGCGAGTCACACAGGTGGGAG  
CAGGAAGCAGCAATATGCTCGCACTCTCTGGATTGAGGACCATCTGCTACATAAAC  
AAGCATCATTCTGCACAAACATCCTCGTGCAGTTTTGACTGGACGGGCTTTAAAACGTGT  
CTTACAATAATCCAATTTGGCTGATCTCTGCAGACAGTAATGAAATAAAATAAACAGG  
ATCAAGTTGGAAATAGTAGGGTGGTTGTTCTAAACCTTTTATGCGGAGAGTGCACACAC  
ATTTTTGTAAGGGTGGGGGAGAAAAACAGTCACTGGGCACCCTAATCCACCGCATTTCTG  
TCAGGGTCCGAGTCTGAATTCAGGCTGGCGTCAATGCCGTGCACCAGGAGGGGAGCAAA  
AGGCTGAGGTAATTTGATTTGAATACGGCATTGAGCGTCAGACAACAAAAGATATCCATC  
TCTCTCATGGCTTTTCAAGCTCTTTTGGTGGCTGGAAATTTATTTGGTTATTCGCTCCC  
GCTCTTCCGAGGACGAGAGATGGGGGAGCCACCGGACTGGCTCAGGCGGTGCTCT  
GGTAGACAGAGTCACGGCGCTGTGCTGCTGCGGTGTGGGGATGTGTGAACACAGATCC  
CCCCAAAGCCAGGGGTCATTTGTGTGATCATTACCATAATCAATTAAGGCTGCAGGAGA  
TTAACACAGAGCCTCAGAGGAGCACCCTTCTGCGACTGATAGGCCGCTTACAGGGA  
ACTGGGAGAGTGTGCTGCTTACCTCAGTGGGAGATGGACACCATCGACGCTGGGATA  
GCCCTTTATCCCCATCAAATGCACATTTTGTACATCTTAGCAGACCTAACCATGCATG  
TGAAGCTAGTTTCAAGACTCCATCACAAGAATTTCTCTGCGGTTAAAAACCTCTCAA  
ATTAACCCATAATACCTGAAAGAGCATTTCAATGAGGCATGTAACCTGAGATGCTATC  
TGTGAGGCAGGGAAGGGGGTGTGGTCTACCTTCAGCTTGAAGTTCACCCGAGGA  
ACTGCAGCATGGTATTTTACAGCTGTGATTTAAAATGCTGGGAGAGCTTGTGAAGGG  
TTACACCCGATGACCCGCTTCAACCTCGCAGCGAGGATGCAGAAAATACCGATGAGGAA  
ACGAAAAGATGAATTTCAAGGAATCTGATGCTTCTTAGCCGTGCTATAATGCTGATATCA  
CTGCTCAACAACAACAACTCCTAGATGAAGTATTGCTAACTTACCTCCTAGCCTTTAG  
AACAGAGAGAAAATGGAACCAAGCGCTCAGTAGAGGTTGAGGATGTGTCGAGGGGAGC  
TTAAGATGATGTCCAA

---

>amplified\_fugu\_segment

ATCCAATTTGGCTGATCCTGTCCAGACAGTAATGAAATAAAATAAACAGGATCAAGTTG  
GAAATAGTAGGGTGGTTGTTCTAAACCTTTTATGCGGAGAGTGCAACACACATTTTGTGTA  
AGGTTGGGGGAGGAAAAACAGTCACTGGGCACCCTAATCCACCGCATTTCTGTCAGGGGTC  
CGAGTCTGAATTCAGGCTGGCTCAATGCCGTGCACCAGGAGGGGAGCAAAAAGGCTGAGG  
TAATTTGGATTGGAATACGGCATTGAGCGTCAGACACAA

---

>rCNE\_mouse\_sequence\_907951

AAAAGATCTGGCCTTCAGAAAAGCTTCTCATTAAAAACTAATCTGTTCCACCACATTTCTT  
CCAAGACACAGCGGATCAGCATTTGGAGCTGGCTTGAATGGCCAGGCTAGTAAGACTGATA  
CAAACAGCTTAAAGTAATTTGATTTGCTATATGGGATTTGAATGCTGACACAAAAGATGAC  
CATCTCTATTTCGACCACCAAGCTTTGTTCCAGCAACGAATTCATTCAGCAATGCCCTTA  
GAGGCTCTGGACCCAGGGAGAAATGACAGACCTGAGACACAAAAGCTGAGCCAGCTGAT  
GAGCCAGAGACAGAGGCTATGCAATTTCCAAAAGTTAATTCAGCGAACAAGGCCAGCA  
GACGATGACTTTGTTGAATCATTTACCATAATCACAATTAAGTGCATGCTCCAGTTCCAG  
CCAAGGTTGGCGGTGCGGCTGCTTCTCATCTGACCATGTACTCCCTGCTCGATTTCCAC  
GTGCAAGCTACTGTACACGTTCTCT

---

>SCE\_mouse\_sequence\_908243

CAAGAC

---

FUGU HITS IN THE CONTEST OF MAMMALIAN rCNE

CLUSTAL W (1.83) multiple sequence alignment

|                    |                                                                |
|--------------------|----------------------------------------------------------------|
| ENSMUSG00000027276 | AAAAGATCTGGCCTTCAGAAAAGCTTCTCATTAAAAACTAATCTGTTCCACCACATTTCTT  |
| ENSRNOG00000007443 | AAAAGATCTGGCCTTCAGAAAAGCTTCTCATTAAAGCACTAATCTGTTCCACCACATTTCTT |
| ENSG00000101384    | AAAAGATCTGGCCTTCAGAAAAGCTTCTCATTAAAGCGCTAATCTGTTCCACCACATTTCTT |
| ENSCAFG00000005627 | AAAAGATCTGGCCTTCAGAAAAGCTTCTCATTAAAGCGCTAATCTGTTCCACCACATTTCTT |
| SINFRUG00000154594 | -----ACCTAATCCACCGCATTTCTT                                     |
|                    | * * * * * * * * * *                                            |
| ENSMUSG00000027276 | CCAAGACACAGCGATCAGCATTTGGAGCTGGCTTGAATGGCCAGGCTAGTAAGACTGATA   |
| ENSRNOG00000007443 | CCAAGACACACAACTCAGTGTGGAGCTGGCTTGAATGGCCAGGCTAATAAGACTGATA     |
| ENSG00000101384    | CCAAGACACAGCGACCGATTTAGCCAGCTCAATGGCCAGCCCTAATAAGACTGATA       |
| ENSCAFG00000005627 | CTGAGACACAGCGATCAGCATTTAGCCAGCTCAATGGCTGCTCCTAATAAGACTGATA     |
| SINFRUG00000154594 | GTGAGGGTCCGAGTCTGAATTCAGGCTGGCTCAATG-----                      |

\*\* \* \* \* \* \*\* \* \* \* \* \*

ENSMUSG00000027276 CAAACAGCTTAAGTAATTGGATTGCTATATGGGATTGAATGCTGACAACAAAAGATAGC  
ENSRNOG00000007443 CAAACAGCTTAAGTAATTGGATTGCTATATGGGATTGAATGCTGACAACAAAAGATAGT  
ENSG00000101384 GAAACAGCTTAAGTAATTGGATTGCTATATGGGATTGAATGCTGACAACAAAAGATAGC  
ENSCAFG00000005627 GAAATAGCTTAAGTAATTGGATTGCTATATGGGATTGAATGCTGACAACAAAAGATAGC  
SINFRUG00000154594 -----

ENSMUSG00000027276 CATCTCTATTTCGACCACCAAGCTTTGTTCCAGCAACGAATTCATTAGCAATGCCCTTA  
ENSRNOG00000007443 CATCTCAATTTCGACCACCAAGCTTTGTTCCAGCAATGAATTCATTAGCAATGCACCTTA  
ENSG00000101384 CATCTCTATTTCGACCACCAAGCTTTGTTCCAGCAATGAATTCATTAGCAATGCCTTA  
ENSCAFG00000005627 CATCTCTATTTCGACCACCAATATCTTTGTTCCAGCAATGAATTCATTAGCAATGCACCTTA  
SINFRUG00000154594 -----

ENSMUSG00000027276 GAGGCTCCTGGACCCAGGGAGAAATGACAGACCTGAGACACAAAACTGAGCCAGCTGAT  
ENSRNOG00000007443 GAGGCTCCTGGGCCAGGGAGAAATGACAGACCTGGGACACAAAACTGGCCAGCTGAT  
ENSG00000101384 GAGGCTCCTGGACCCAGGGAGAAATGACAGACTGGGGACACAAAAGCTAGGCCAGCTGAT  
ENSCAFG00000005627 CAGGCTCCTGGGCCAGGGAGAAATGACAGACTAGGGACACAAAAGCTAGGCCAGCTGAT  
SINFRUG00000154594 -----

ENSMUSG00000027276 GAGCCAGAGACAGAGGCTATGCAATTCCAAAAAGTTAATTACAGCGAACAAAGGCAGCA  
ENSRNOG00000007443 GAGCCAGAGACAGAGGCTATGCAATTCCAAAAAGTTAATTACAGCGAACAAAGGCAGCA  
ENSG00000101384 GAGCCAGAGACAGAGGCTGCGCAGTTCCAAAAAGTTAATTACAGTGGACAAAGGCAGCA  
ENSCAFG00000005627 GAGCCAGAGACAGAGGCTGCACAATTCCAAAAAGTTAATTATGGTGAACACCAGCAGCA  
SINFRUG00000154594 -----

ENSMUSG00000027276 GACGATGACTTGTGAATCATTACCATAATCACATTACTGCCTAGTCTCCAGTTCCCG  
ENSRNOG00000007443 GACGATGACTTGTGAGTCATTACCGTAATCACATTACTGCCTAGTCTCCGGTTCCCG  
ENSG00000101384 GACGATGACTTGTGAATCATTACTATAATCACATTACTGCCTAGTCTGAAGTTCCCG  
ENSCAFG00000005627 GACAATGACTTGTGAATCATTACCATAATCACATTACTGCCTAGTCTCCAGTTCCCG  
SINFRUG00000154594 -----

ENSMUSG00000027276 CCAAGGGTGGCGGTGCGGCTGCTTCTCATTTCTGACCATGTACTCCCTGCTCGACTTCCAC  
ENSRNOG00000007443 CCAAGGGTGGCGGTGTTGGCTGCTTCTCATTTCTGACCATGTACTCCCTACTCATCTCCAC  
ENSG00000101384 CCAAGG-TGGCATTG---CTGCTTCTCATTTCTGCCATGTACTTCATACTCATTTGCCAC  
ENSCAFG00000005627 CCAAGGGCGGTGTTG--GCTACTTCTCATTTCTGACTTGTCTTCTCATCTCACTTGGCCAC  
SINFRUG00000154594 -----

ENSMUSG00000027276 GTGCAAGCTACTGTACACGCTTCCT-  
ENSRNOG00000007443 CTACAACACATG---GTGCTCT---  
ENSG00000101384 CTGCAATTTACTGTGTGACTTCT-  
ENSCAFG00000005627 CTGCAATTTCTGTATACATGACTTCTT  
SINFRUG00000154594 -----

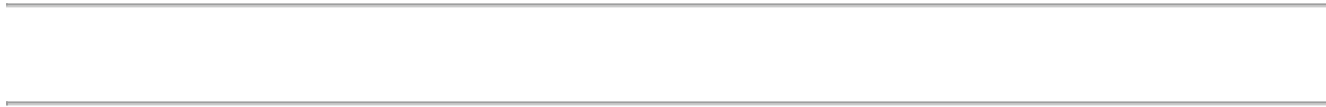

# Fragment Jag1\_16409

Representation of conserved regions within their genic context

Within the mouse context is shown the rCNE from which the tested SCE is derived (red diamond)

Within the fugu context all CHAOS hits obtained from the mouse rCNE are shown (green diamonds, in red the one tested)

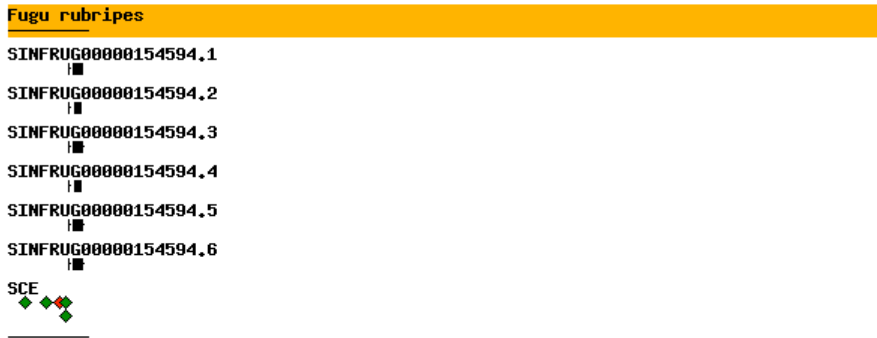

Conserved regions shown within 2000bp context

The mouse context contains:

- rCNEs green boxes, in red the one considered for this test
- SCEs yellow boxes, in red the one considered for this test
- CHAOS hits blue boxes, in red the one considered for this test

The fugu context contains:

- the fragment amplified in this test
- CHAOS hits blue boxes, in red the one considered for this test

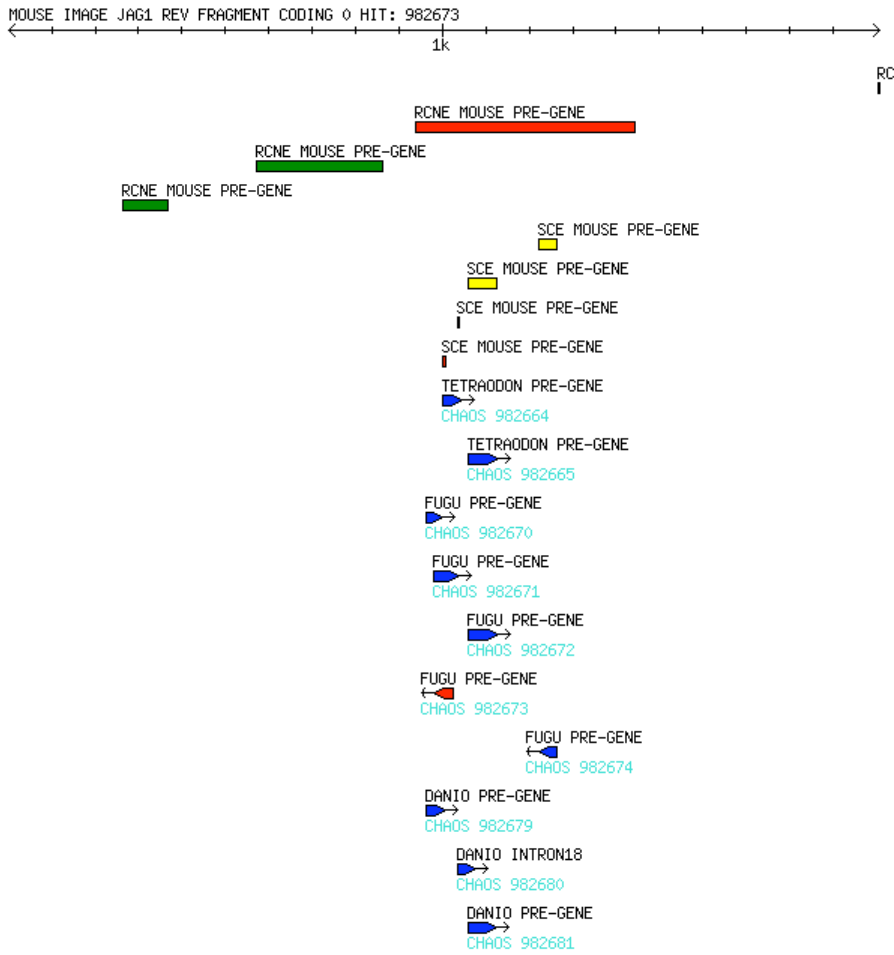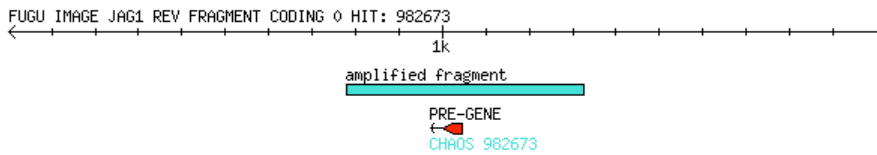

## SEQUENCES

```
>fugu_fragment_for_primer_design_16409
AACCAAGTAAAAGCTGCAGGAAATAGCTCTTTTATGTGAAACTGCTACAATAATTAATGT
AAAGAATCACACACTCTGTTTTCAAAGGGATTCTGTATGTAGGGAAGCAACTGTAAGCCC
TCGAAATGTCAAAGATCTTTATCTTTATGATTAATCCTGTCAATCCCAAACACGCACGTC
TCACAATGAGCTGTGAAGCTTAAGATTAAAATGACGCATGGTATTAAGAGATCAGGCACC
TTAACCTTTCTCTCTTTGTGCTGCNNNNNNNGTTGTGTGTGATTTTATATATATGTGTT
CCAAAAATGTGCTACAACCCPTAACATCCAAAAAGACAAATGTGCTTAGGTGACTCC
CGTCTCAACAAACCCTGTATCAACCCGAGTCATTTGTCTCCACACCTGGGAAATAAC
AACTCTTGTGCGGTTTCAGCGTTCAACACCGTCATTTCCAAAAAGTTAATCATCAAGCCCA
ATGACCGGACATCAGTGTCCAGTGTGCAACTAGTTATTTGGACTTTTGGACCAACAGAC
CCCAACATGTTTCAGCTAGACCACCGCGTCATCCAGCCTCGCCCTTAACACCGGTGTAC
CACAAGGCTGTGTGATGGGTCTGTTCTCTTCTCCCTTTTCAACCAGGAATTCAGACCTG
```



TCAGGACTCTAAATCTATACACGATCTCCGTCTGGCACGGGCTCACTGGCAGGCCGCTG  
TCCTGGTTTGAATCTGGCCTATCTGGGTGTTCAATTGAGTGTGTGTGGCACGGTCAGGCG  
TGCGCTCATTACCAGCTCTCCACTGGGGATTGCTGCTGGGCCGTTCCCTAAGCGAACGTG  
CCACCAACCTGCTGGTAGAAGCTACTGTGATCTACCAATTGACTCCGGCAATGCCCCCTT  
CTATTCTAACATGAAACTGATGCTTGTGACGTGTGGCTTCAGATGGTCCACTACTGTGCAT  
CGCTTCTGGTCTTCCACTAATCCAAGTGGGCCACATCACCCAGTGTGATCGAGTTCT  
ACTGGCTGCCGTGGCCGCCACATTACAGCAATTCACCTTATACTCAGCGGTTCTGCTC  
TTTCTTACTTGGCAATCTTGTGGAGCTGGACTACCCCTTGTCTCATCTGGCACAGC  
TACCTGTATAGACAAGGAACTGAAAGGCTCATAACCAATGCTGGAGCGACCCCGAGC  
CTGGCAGACCTGTGGCAGCGCTCCTCTGTGACAGCTTTGAAGACACAGATCTTACA  
CCGGTATCCCAATTCACCTCCCTCCATGGGTCTGCCATGATGGCAGTTGCACTTGTACT  
CCATATTTTAGGATTTGTAAGGTAGTCTTTGATCGGGGCTCCTGCTGAAGTCGCTGTGA  
GCCACTCAGCCTCAGAACACATCTGGGTGTGCTGTGCACTTCTTACACATTCGAAATG  
CACCTTTTATCTCTGTTTAACTAGAATGCTTGTGACCCATCTGAAATGCTCTATAAAC  
AGGTGGAACCTCTTGGTTTATAGCTGCTGTATACAAACCAATCGCAATTTATATCCGTC  
CTGTTTCCAACCTTCTTGGTTGGAATCGATTAATTTGCATCTTTGAGTAACAGTTAAA  
GATAAATGTCACCATGGTGATAAATGAAAGAAATGTTGGTTTTTAAACCAAATCCTT  
TCATAAATTTAGACACAGTCGATCGTAGATCTCAGACTCGTGAATAGCTGGACACCGGTG  
AAGTTGCTGGCCAGCTGTGGTCTGATCCAGCCGCTCGCTGTGTGGTCCAGTATGAT  
CTTTGTGAGGGAGGGTTGTGCTATGCGGCTGCTCCACTAAATCCAGGGCTGCATTACA  
CAAGTGTCCAGTCAAACAGCGCACAGACGTGGGGACTTCCCTTCCCTCAAAGACGTA  
GAGGAATACTGTATTGCCATGCGCCGCTGAGGTCAATATCACTTTCAGCCGAAAGCT  
CCAAGGTTAAACCTGAATGTGCTTTAAGTGTCAAACATTTGGTGGGTGACAGTCCGAA  
TGATC

---

>amplified\_fugu\_segment

GTGCGCTCATTACCAGCTCTCCACTGGGGATTGCTGCTGGGCCGTTCCCTAAGCGAACGT  
GCCACCAACCTGCTGGTAGAAGCTACTGTGATCTACCAATTGACTCCGGCAATGCCCCCT  
TCTATTCTAACATGAAACTGATGCTTGTGACGTGTGGCTTCAGATGGTCCACTACTGTGCA  
TCGCTTCTGGTCTTCCACTAATCCAAGTGGGCCACATCACCCAGTGTGATCGAGTTCT  
TACTGGCTGCCTGTGGCCGCCACATTCAGACCAATTCACCTTATACTCAGCGGTTCTGCT  
CTTTCTTACTTGAGCAATCTTGTGGAGCCTGGACTACCCCTTGTCTCATCTGGCACAG  
CTACCTGTATAGACAAGGAACTGAAAGGCTCATAACCAATGCTGGAGCGACCCCGAG  
CTCTGCCAGACCTGTGGCAGCGCTCCTCTGTGACAGCTTTTGAAGACACAGATCTTAC  
ACCGGTATCCCAATTCACCTCCCTCCATGGGTCTGCCATGATGGCAGTTGCACTTGTAC  
TCCA

---

>rCNE\_mouse\_sequence\_907951

AAAAGATCTGGCCTTCAGAAAGCTTCTCATTAAAACACTAATCTGTTCCACCACATTCCTT  
CCAAGACACAGCGATCAGCATTTGGAGCTGGCTTGAATGGCCAGGCCTAGTAAGACTGATA  
CAAACAGCTTAAGTAATTTGGATTGCTATATGGGATTGAATGCTGACAAACAAAAGATAGC  
CATCTCTATTGACCCACCAAGCTTTGTTCAGCAACGAATTCATTGACCAATGCCCTTA  
GAGGCTCTGGACCCAGGAGAAATGACAGACCTGAGACACAAAACCTGAGCCAGCTGAT  
GAGCCAGAGACAGAGGCTATGCAATTCAAAAAGTTAATTCAGCGAACAAAAGGACGCA  
GACGATGACTTGTGAATCATTACATAATCACATTAATGCACTAGTCTCCAGTTCACAG  
CCAAGGTTGGCGGTGGCTGCTTCTCATCTGACCATGATCTCCCTGCTCGACTTCCAC  
GTGCAAGCTACTGTACAGCTCTCCT

---

>SCE\_mouse\_sequence\_908243

CAAGAC

---

FUGU HITS IN THE CONTEST OF MAMMALIAN rCNE

CLUSTAL W (1.83) multiple sequence alignment

```
ENSRNOG00000007443      AAAAGATCTGGCCTTCAGAAAGCTTCTCATTAAAACACTAATCTGTTCCACCACATTCCTT
ENSCAFG00000005627      AAAAGATCTGGCCTTCAGAAAGCTTCTCATTAAAAGCGCTAATCTGTTCCACCACATTCCTT
ENSG00000101384         AAAAGATCTGGCCTTCAGAAAGCTTCTCATTAAAAGCGCTAATCTGTTCCACCACATTCCTT
ENSMUSG00000027276      AAAAGATCTGGCCTTCAGAAAGCTTCTCATTAAAACACTAATCTGTTCCACCACATTCCTT
SINFRUG00000154594      -----AATGTGGCGGCCACAGGCAG
                               *** ** * ***** *

ENSRNOG00000007443      CCAAGACACAACAATCAGTGTGGAGCTGGCTTGAATGGCCGGCCTAATAAGACTGATA
ENSCAFG00000005627      CTGAGACACAGCGATCAGCATTTAGCCGGCCTCAATGGCTCGTCTAATAAGACTGATA
ENSG00000101384         CCAAGACACAGCGACAGCATTTAGCCAGCCTCAATGGCCAGCCTAATAAGACTGATA
```

```

ENSMUSG00000027276      CCAAGACACAGCGATCAGCATTGGAGCTGGCTTGAATGGCCAGGCCTAGTAAGACTGATA
SINFRUG00000154594      CCAGTAGAACTCGATCAGCACTGGGG-----
*      * *      * * * *      * *

ENSRNOG00000007443      CAAACAGCTTAAGTAATTGGATTGCTATATGGGATTGAATGTCTGACAACAAAAGATAGT
ENSCAFG00000005627      GAAATAGCTTAAGTAATTGGATTGCTATATGGGATTGAATGTCTGACAACAAAAGATAGC
ENSG00000101384         GAAACAGCTTAAGTAATTGGATTGGTATATGGGATTGAATGTCTGACAACAAAAGATAGC
ENSMUSG00000027276      CAAACAGCTTAAGTAATTGGATTGCTATATGGGATTGAATGTCTGACAACAAAAGATAGC
SINFRUG00000154594      -----

ENSRNOG00000007443      CATCTCAATTTCGACCACCAAAGCTTTGTTCTAGCAATGAATTCATTAGCAATGCACTTA
ENSCAFG00000005627      CATCTCAATTTCGACCACCATATCTTTGTTCCAGCAATGAATTCATTAGCAATGCACTTA
ENSG00000101384         CATCTCAATTTCGACCACCAAATCTTTGTTCCAGCAATGAATTCATTAGCAATGCTCTTA
ENSMUSG00000027276      CATCTCAATTTCGACCACCAAAGCTTTGTTCCAGCAACGAATTCATTAGCAATGCCCTTA
SINFRUG00000154594      -----

ENSRNOG00000007443      GAGGCTCCTGGGCCAGGGAGAAATGACAGACCTGGGACACAAAACTGGGCCAGCTGAT
ENSCAFG00000005627      CAGGCTCCTGGGCCAGGGAGAAATGACAGACTAGGGACACAAAAGCTAGGCCAGCTGAT
ENSG00000101384         GAGGCTCCTGAGCCTGGGCAGAAATACAGACTGGGGACACAAAAGCTAGGCCAGCTGAT
ENSMUSG00000027276      GAGGCTCCTGGACCAGGGAGAAATGACAGACCTGAGACACAAAACTGAGCCAGCTGAT
SINFRUG00000154594      -----

ENSRNOG00000007443      GAGCCAGAGACAGAGGCTATGCAATTCACAAAAGTTAATTACAGCGGACAAAGGCAGCA
ENSCAFG00000005627      GAGCCAGAGACAGAGGCTGCACAATTCACAAAAGTTAATTATGGTGAACACCAGCAGCA
ENSG00000101384         GAGCCAGAGACAGAGGCTGCGCAGTTCCAAAAGTTAATTACAGTGGACAAAGGCAGCA
ENSMUSG00000027276      GAGCCAGAGACAGAGGCTATGCAATTCACAAAAGTTAATTACAGCGAACAAAGGCAGCA
SINFRUG00000154594      -----

ENSRNOG00000007443      GACGATGACTTGTGAGTCATTACCGTAATCACATTACTGCACTAGTCTCCGGTTCCCG
ENSCAFG00000005627      GACAATGACTTGTGGAATCATTACCATAATCACATTACTGCACTGGTCTCCAGTTCCCG
ENSG00000101384         GACGATGACTTGTGGAATCATTACTATAATCACATTACTGCACTGCTCTGAAGTTCCCG
ENSMUSG00000027276      GACGATGACTTGTGGAATCATTACCATAATCACATTACTGCACTAGTCTCCAGTTCCCG
SINFRUG00000154594      -----

ENSRNOG00000007443      CCAAGGGTGGCGGTGTGGCTGCTTCTCATTCTGACCATGTACTCCCTACTCATCTCCAC
ENSCAFG00000005627      CCAAGGGCGGTGTT--GGCTACTTCTCATTCTGACTCTGTCTTCATCTCACTTGCCAC
ENSG00000101384         CCAAGG--TGGCATT---GCTGCTTCTCATTCTGCCATGTACTTCATACTCATTTGCCAC
ENSMUSG00000027276      CCAAGGGTGGCGGTGCGGCTGCTTCTCATCTGACCATGTACTCCCTGCTCGACTTCCAC
SINFRUG00000154594      -----

ENSRNOG00000007443      CTACAAAC-----ACATGGTGTCT-
ENSCAFG00000005627      CTGCAATCTTCTGTACATGACTTCTT-
ENSG00000101384         CTGCAATTTACTGTGTGTGACTTCT-
ENSMUSG00000027276      GTGCAAGCTACTGTACACGTCTCTCT-
SINFRUG00000154594      -----

```

## Fragment Lmx1b\_17027

Representation of conserved regions within their genic context

Within the mouse context is shown the rCNE from which the tested SCE is derived (red diamond)

Within the fugu context all CHAOS hits obtained from the mouse rCNE are shown (green diamonds, in red the one tested)

10k 20k 30k 40k 50k 60k 70k 80k 90k 100k 110k 120k 130k 140k 150k 160k 170k

**Mus musculus**

Lmx1b.1  
|-----|

rCNE

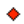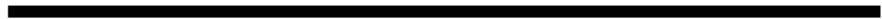

**Fugu rubripes**

SINFRUG00000155564.1  
|-----|

SCE

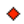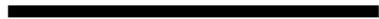

Conserved regions shown within 2000bp context

The mouse context contains:

- rCNEs green boxes, in red the one considered for this test
- SCEs yellow boxes, in red the one considered for this test
- CHAOS hits blue boxes, in red the one considered for this test

The fugu context contains:

- the fragment amplified in this test
- CHAOS hits blue boxes, in red the one considered for this test

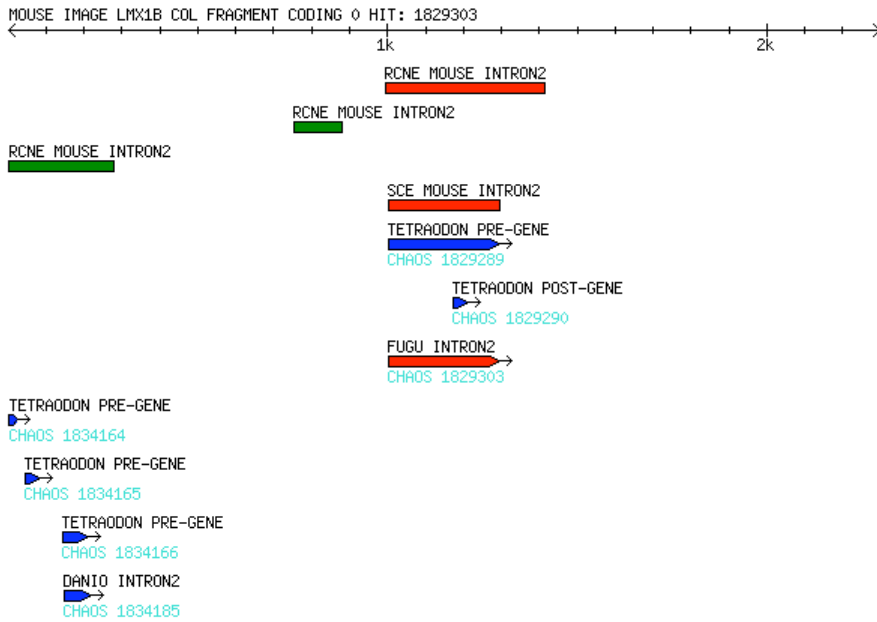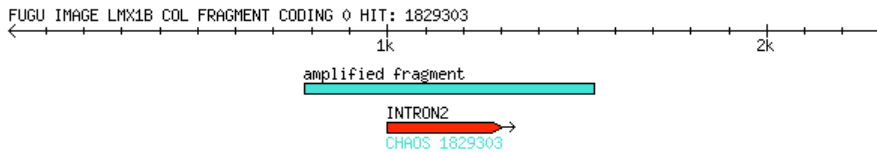

## SEQUENCES

```
>fugu_fragment_for_primer_design_17027
GATGGGTAGACGTGCACCTGACCTGAATATAAATGGCACCAGTCCCTTCGATAGGTTGGAG
GACGCCACTTCTTTACCCATATCAAATATGCACGCCGTCTCCGTGCGTCCGGTGGGTTAA
ACAAACTAGGATTAATCACCCGGTTCGGTGTGGTTTAAATCAGGATCGGCCACATTCATCTG
GTTGCAGGAATGTAAACTTAACTTAAATGTGCGCTTTATATTGTATTTATTTGGTTTG
AAAAGAGATGATTTCTTTATCCGTTACACTGTTACTACGCAGCTCTCCTTAATGTAAT
GAAGTTACTATTTTATCCAGGTGTGTAGGGGAACATTCCTCCCTCGGTATTTTAAAT
TAATAGCCGCGAGGCATGTAGCAGCCAGTCTCTTTGATGTTTCCCTCCTTTACATTCAGG
TGAACCTGGGCTCACAGCTCTTTATTTATGAGGCAATCCCTCACATGTAAAGATGATAAA
GTTGACATTTTACAGGCAGACGAGCTTTTCGCATCTCAAGGAGCCGGCTTTGTAAAACAC
CCCAACAAATAGAAGCTTTTAGATTTTATGGCCAAGTCCAGCAGGATCTTTTGGAGAT
AAAGCGGCTGCTTCTTTGGTTGTAAATCCTGTCAGTAAATTTTCATAAAGCTAGCTATAT
ACAGTATAACATCTACCTGGGTCANNNNNNNNNNNNNNNNNNNNNNNNNNNNNNNNNNNNN
NNNAACGCCGAGCTTTCAGCTAGGAATCATATGCCAGGCAGCCAGCTAATATCCAAAAGG
TCACCCGCTGTTATGATTGAAGCGTGCACCTGGTGTCTTTGACCCAACGCACAAAGTGGAGT
TATAGGTGGCCGGTCACTGTCAGTCAAGGTGTGGGTCTTTTAAATCATTTTCATCTTT
GCTGGGGGGCTCTCTTGAGACCCNNNNNNNNNNNNNNNNNNNNNNNNNNNNNNNNNNNN
NNNNNNNNNNNNNAGAGAAAAGCAGTTGAGGCGATGGGGAGAGGCAGGCAAGCTAGACTG
TCAAATCTCAACCGTTGAATATTTAATGGAGCCTGGAGTGTATTTAGTTAGCCTGCG
ATTTTACCGCTCTGTCATATAGCCGCTCCCGTGTAGCCTGCTGATGATCTTTAGTGCTC
TTCCCCCAGGAGAGGCTAGGCACTAAATGCAATTTATGGATTTTCTGCAACCGCAATGTGT
TTGATATTTTACTGATCTAATTTGCAATCTGGTAGTTTATTTGTTGGCATTTTAGTGGC
GCTCAAGTGGCGAGGCAAAATTTGATTTCCCTTCATAATTTTATAAATTCATTAATGGT
GTTAGCGTATTGGCACGGATCTTAAATAAAGCTTGAGAATCACTGATGGATGAATGCAT
CCACCTTTTATATGCTGTGCCCAATCTTTTCACTGATCTGGTTCFAATTAATAAAT
CATCTGCTGGTGTACTGTCTTTGTGAAATATGAATTCATAAACGGACGCGAATGGCTCC
CTTCACATCGCATGCGTACGCAGATCAGTCGTGGCAGAACAGATTTGTAACATTTTTC
```

AGAGACAAATAAGCGTATTGGCAACAGAGCAAGAGAGGCAAGCGTGGCACAATAATGCAA  
GTGGTTGTTGGAAANNNNNNNNNNNNNNNNNNNNNNNNNNNNNNNNNNNNAGTTCCACCAGT  
TTTGTGCAGAGCCTTAGGATTTCTACCCAGTGACGGATGTGTACTTAGAGGGGTAGCA  
TTAGCCGTAATGCTGTAGCATGTAGCCATGTGAGTGTGTAGTGTAGATGCCAGCA  
GTAGAGCTAATGGTGTAGTGTGTAGCCTTCAGAGGGAATGCAATCGGTAGGCTGTGA  
TGGATGAGTGTACGCTGCGGAGGCTGCAAGCCTCCATTCGCGCGCTGTGAGTGGC  
TTAAGTGGACGCCACAATTAGCACCAGAAATCAGAGAGCGCTTAATCTGATGGTAGGCTC  
AATGTTCTGTAAGGAAAAAATGGCAGTGGTGTGATGATGACTTAATGAAAAAATC  
AGTATTGGAGAGAAAACACTGTAAACAACCTTTTCAGTTTCAGAAGGTGTACAATAAG  
TCGTGACGTGATGCTGAGATTCATTTTGTTCGAGAGGGAAGCTTTATTTAGCCTTAGA  
CCCCACAGTTGCTGCTCAGGCACAAAATGACCACGCACGTGTGCCAAGAGCCTAATCTC  
ACGTCCATGCCAATAGTAAACCAACTTGTAGACAGGGAGGCATAGTTAGACTCATTTATT  
TTGGAATCTTCTAGATTCTT

>amplified\_fugu\_segment

GTCACCCGCTGTATGATTGAAGCGTGCCTGGTGTCTTGACCCACGCACAAAGTGGAG  
TTATAGGTGGCCGGTCACTGTCTCAGTCAAGGCTGTGGGTTTTTAAATCATTTCATCTT  
TGCTGGGGGGCTCTCTTGAGACCCNNNNNNNNNNNNNNNNNNNNNNNNNNNNNNNN  
NNNNNNNNNNNNNAGAGAAAAGCAGTTGAGGCGATGGGGAGGAGGCAAGCTAGACT  
GTCAAATCTCAACCGTTGAATTTAATGGAGCCTGGAGTGTATTATTAGTTAGCCTGTC  
GATTTTACCCTCTGTCAATAGCGGCTCCCGTGTAGCCTGTGATGATCTTTAGTGTCT  
CTTCCCCAGGAGGCTAGGCATAAATGCAATTTAGGATTTCTGACCCGCAATGTG  
TTTGATATTTTTACTGATCTAATTTGCAATCTGGTAGTTTATTGTTGGCATTTTAGTGG  
CGCTCAAGTGGCAGGCAAAATTTGATTTCCCTTCATAATTCTTTATAACTTCATTAATGG  
TGTTAGCGTATTGGCAGGATCTAAATAAAGCTTGAAGTCACTGATGATGAATGCAT  
TCCACCTTTTATGCTGTGCCCCATCTTTCACTGATTTCTGTTCTAATTAATAA  
TCATCTGCTGGTGTACTGTCTTTGTGAAATATGAATTCATAAACGGACGCAATGGCTC  
CCTTCACATCGGCATGCTACGCAGATCAGTCTGGGGAGAACC

>rCNE\_mouse\_sequence\_1586000

TGGGGCAAGGGGAGGAAGCCTGGATAGTCAAATTTCCATAGCTGAATATTTAATGAGGC  
CTGCTGGTTTTATTGGTTGGCTGTGATTTTTATTCTTCTGTCAATAGCTCCTCATATG  
TGGGGCTGTGTGATCTTTAGCAGCGCCTCCAGGGAGCGCTGCCACTAAATGCAATTA  
TGGATTTTATACCTCAATGTGTTGATATTTCCACTGATCTAATTTGCAGCCTGGTAGTT  
TATTGTTGGCATTTTAAATGGCTTCAAATGCTATGGGAATTTGATTTCTTTTATAAT  
TCCTCCTTAAACAGTTAATGTGAGTGGCGGATGGCCAGATTTTAGAGTCCAATGTAT  
AGAAAAGAGTGGGAGGGGGGCACATGCTTTGATATACTTAAAGATGTGTCCATTGGAG

>SCE\_mouse\_sequence\_1586058

AAGGGGAGGAAGCCTGGATAGTCAAATTTCCATAGCTGAATATTTAATGAGCCTGTGG  
TTTTATTGGTTGGCTGTGATTTTTATTCTTCTGTCAATAGCTCCTCATATGTGGGGCT  
GTGGTGTCTTTAGCAGCGCCTCCAGGGAGCGCTGCCACTAAATGCAATTTAGGATTT  
TATACCTCAATGTGTTGATATTTCCACTGATCTAATTTGCAGCCTGGTAGTTTATTGTT  
TGGCATTTTAATGGCTTCAAATGCTATGGGAATTTGATTTCTTTTATAATTCCT

FUGU HITS IN THE CONTEST OF MAMMALIAN rCNE

CLUSTAL W (1.83) multiple sequence alignment

```
ENSCAFG00000020170      TGGGACCAAGGGGAGAGGCTGAGATAGTCAAATTTCCGTTGCTGAATATTTAATGAAGC
ENSG00000136944        TGGGACCAAGGGGAGAGGCCAGGATAGTCAAATTTCCATGCTGAATATTTAATGAGGC
ENSMUSG00000038765     TGGGGCAAGGGGAGGAAGCCTGGATAGTCAAATTTCCATAGCTGAATATTTAATGAGGC
ENSRNOG00000017019    TGGGACCAAGGGGAGGAAGCCTGGATAGTCAAATTTCCATAGCTGAATATTTAATGAGGC
SINFRUG00000155564     -----AGAGGCAGGCAAGCTAGACTGTCAAATCTCAACCGTTGAATATTTAATGAGGC
                        *  *  *  *  *  *  *  *  *  *  *  *  *  *  *  *  *  *  *  *  *  *  *  *
ENSCAFG00000020170      CTGCACGGTTTTATTGGTTGGCTGTGATTTTTATTCTTCTGTCAATAGCTTCTCATAT
ENSG00000136944        CCATGCGGTTTTATTGGTTGGCTGTGATTTTTATTCTTCTGTCAATAGCTTCTCATAT
ENSMUSG00000038765     CTGC-TGGTTTTATTGGTTGGCTGTGATTTTTATTCTTCTGTCAATAGCTTCTCATAT
ENSRNOG00000017019    CTGC-CGGTTTTATTGGTTGGCTGTGATTTTTATTCTTCTGTCAATAGCTTCTCATAT
SINFRUG00000155564     CTGGAGTGTTTTTATTAGTTAGCCTGTGATTTTTACCCTCTGTCAATAGCGCTCCCGT
                        *  *  *  *  *  *  *  *  *  *  *  *  *  *  *  *  *  *  *  *  *  *  *  *
ENSCAFG00000020170      GTGGGCTGTGATGATCTTTAGCAGGCGCTCTCC-AGGGACGGCT-GCCACTAAATGCAA
ENSG00000136944        GTGGGCTGTGATGATCTTTAGCAGGCGCTCTCC-AGGGACGGCT-GCCACTAAATGCAA
```



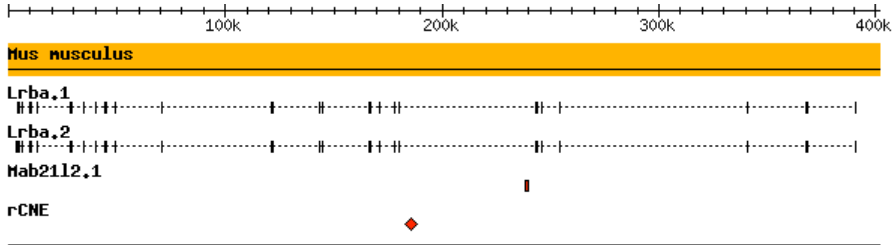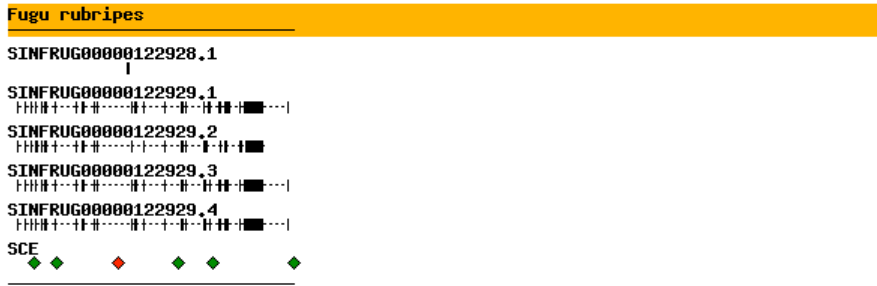

Conserved regions shown within 2000bp context

The mouse context contains:

- rCNEs green boxes, in red the one considered for this test
- SCEs yellow boxes, in red the one considered for this test
- CHAOS hits blue boxes, in red the one considered for this test

The fugu context contains:

- the fragment amplified in this test
- CHAOS hits blue boxes, in red the one considered for this test

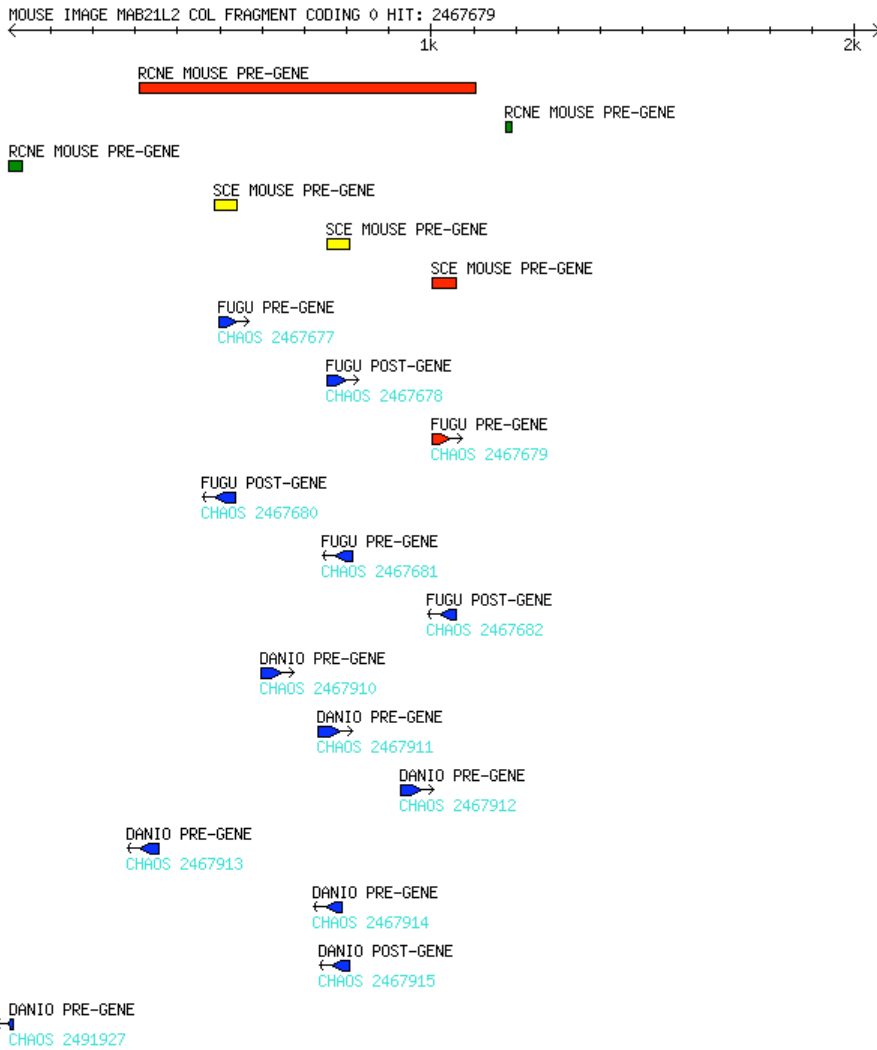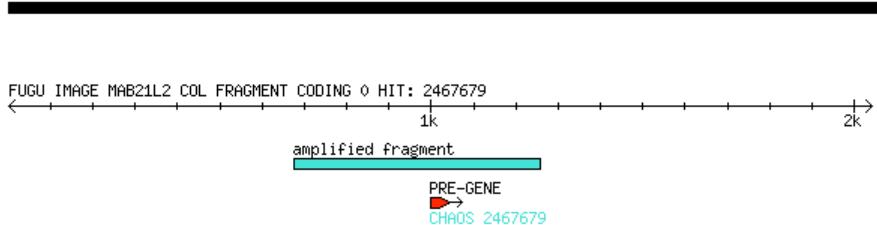

SEQUENCES

```
>fugu_fragment_for_primer_design_23001
TCAGGGTCATTAAATGCTGGTTGTAATATACAGTGATGTAACGTCAACGGCAGCTACTG
GCCATGACTGGAACCAGATCCTGCAGGCAACAAGTAATTTGTTNNNNNNNNNGTTGTTA
GAAAAATTAAAGGAACAAGTCTTCCCGTCTAATAAAGGAATGGCCTTACTGGAAAACAG
GATGAGGGGAAAGAGCGAGGGAACGGAGAGAGAATGAAAAAGAGGTCATCCCAACATCA
CTCCACGAGTTGTTGTTGCGGCGCAGTTGAGCGATTTATCGACCAGTCAAGGAACCGTC
TGTCAGAGGGGACGAGGAGGTGCGACAGCATGAGGGAGGCAGAGGAAGAGACTGACACAG
GCCAATATGAATGACCGAGAGTGAGGGATCCGTTTCTTGGCCTCATTGATAATGACAT
```



ACCTGCTTGAGCTGTCGGTTAGTCTTATAGCACACACTACTTAGGCTCTAACTGGAAAAAT  
CAATAGGCTCCTCTCTCGGAGACCCCGCTGCCATGGCTCCCTGTGATTTGGCAGCTGCA  
GTCGAAGTTCGACCCCGACGAGCATGAGAGTTGGGGGAATGAGCGCGCGTNNNNNNNN  
NNNNCCCGTCCCTGTAGTTTGACACTTTAGGGAGAGCTTAACGATATGGGACTGGCCG  
CTACATAACGCCAGGGTGGTTTCCCTGACTGAGTGACCAATCCATTCAACCGCTCACGCT  
AACCCGAGGAGCGTACCACCCCGCTAATTAGAGCTACCAATGCCTCCTGAATGGGAG  
TTTTTATGATGTGTAGTCTGAGGTTACGCACTGACCTTTTGAAAAAATTTAGTGTAGTA  
TTCCFPACCAAAAATATATACTGCTAGAGTTTGGAAACGCCCAAAAATTAATAATTTGTA  
CGTGTAAACAAAATAAATACAGTTAATTTAGGTTTTTAATACTTTGGAAATAAGGGA  
AGGTTAAAATAACATGAACGAAAAGAAATGACTATAACATTTGGTTTAAAGCAGGTAAA  
AGCTTAATATACTTTACATGCTTTGACAGTCCAATATAAAAATGTTAAGAATAAGCAA  
CACAGGAAAACTTCTCTTGCATAAATGCAATTAATTTATTTTATCAAATGTATTTATC  
CTAATATTCATGCACAACTGTATGAAATAAAAACATAACTTTTCACTTTTCCCAAG  
TTCAAAAATTTACAGTGTAGTTGGTATTAATCTATGGTGGCTCTAGACTGCCAAAATCT  
ACATTAATATTTATAGTACAATTTTAAAAGTAGTTAACTTACCAATAAACTAAGATT  
ACTTTCTCATTTAAGCATTAATTTATATAGCTGGACCAGATGCTGGAATAAAGTAGAA  
ACCATTAGTAATTTCCATTCAATACCACATTTGAAATTTGCAATCAGGATTTGAGAGACAGA  
CCCTCCAATCAGATTTCTGCTGTGCTTCCGTTGACCAATGAGGTTGACGTTCACTGAAT  
TCACTTCTCATTTATGCAATATGCAACGGCTTCCGGGAGCGGCTTGCACAAATAACTG  
TACATTCATATTTGATGCTTCCATCTAAGACACGGTATTAACCCGACACACACCGCAG  
TGACGCAACAAACAGCTGCTCCGTGACTTTCATCAGCTCTGCTCTCTATGAACAGATGC  
AACAGCTCTGCCAGCAATTAGCTGCCTGTGATAACTTTCTTTGAGCCCTCTGTGAGGAG  
AGCAGCTGGTCCATCCGGGTTTGGAGGGAGGAAAGAACGTGTGAACAAGAGGGTAAAA  
ACAGCGCTCGCTGTGTTCTGTTGGGAGAGGGCACTTTCACGAGCACTAGTGGATGCA  
GCAAAGCTTGACCTCGGACTTAATCATTCAGAATTCAGCAGTTTGTGACAACAGCTTGT  
GTAGTGGGGTTCCCATCTGATCAGGTAGAGGGGAATAAAACCGAAGCACAGCTGGGA  
CAATGGAAGACGAGAAGAAAGGGAAGCAGAGGAGATGTGCACAGCATGGACACTGTT  
TTT

---

>amplified\_fugu\_segment  
GGTGGTTTTCCCTGACTGAGTGACCAATCAACCCGCTACGCTAACCCCGAGGAGCC  
GTCACCACCCCGCTAATTAGAGCTACCAATGCCTCCTGAATGGGAGTTTATGATTTGTG  
TAGTCTGAGGTTGACGACTGACCTTTTGGAAAAATTTAGTGTAGTATTCCTACCAAAAAT  
ATATACTGCTAGAGTTTGGAAACGCCCAAAAATTAATAATTTGACGTTTAAACAAA  
CTAAATACAGTTAATTTAGGTTTTTAATACTTTGGAAATAAAGGGAAGGTTAAAATAACA  
TGAAAGAAAAAGAAATGACTATAACATTTGGTTTTTAAAGCAGGTAAAAGTCTTAATATACT  
TTTACATGCTTTGACAGTCCAATATAAAAATGTTAAGAATAAGCAACAGGAGAACTT  
CTCTGCTAAATGCAATTAATTTATTTTATCAAATGTATTTCTTCAACTATTTATGCT  
ACAACTGTATGAAATAAAAACATAACTTTCACTTTTCCCAAGTCAAAAATTTTAC  
AGTGTAGTTGGTATTAATCTATGGTGGCTCTAGACTGCCAA

---

>rCNE\_mouse\_sequence\_2026043  
TCCTTAACATTTTCATGGGTGACAAATCAATTAATATATTCATTACTCTAATGTTTCGA  
CTTGGCAGCTTTAGTCTAGCATGNNNNNNNNNNNNNNNNNNNNNNNNNNNNNGTGTATGACCTT  
TGTATTGATTTGGCTAAAATGGCTTTAGCTGGGTGTGGAAGATGGGGCAGTTGGGAGGG  
AAGACAGAAAAGCACAAAATACACACACTCTTATGTTTTCTCTTCCAACTACTGAGGGA  
GATGATAAAAACACAGCAAAATGATGATCAGCTCATTTTATCTTATCGCTTTGGGGCTAG  
GTGACAATGAAGTTCATATTTCACTGGCTCCCAATGAAGATTTGTGAAAATTACTTGCCCT  
CATGACCTGAAAATTTCACTAGAAGACAGAAAATTTCTCTTCTGCAAAAGTAATGCAATTTT  
CAGATGTCACCTTTAGCCAGCTTTAAAATAAATTTTCAATTTATATTAACCAATGATAT  
TGATATTTTACAGAACGCTCTTTGATACATGAAGCACTGACTGGCAAAATGATGTTGCT  
CTAGATGGGCAAACTATTTTACTTTAAGCTGCGATGGCAGGAGATTTATGGCAAACTG  
AAATTTCCATTTTACATAACTTAATATTTGTGCTGGAGCAATGCACCTTTAAGCCTTTGGCC  
TGTAAATAATTCGGACTATTTACTTTGTTCTATTTTATTTTCAACATTTCTCAGCTTAAA  
AAATAATTTACATTTTACAGGATATATATAAAATCCAGNNNNNNNNNACTAGTAGTTT  
TTATATAGCGTAATGAG

---

>SCE\_mouse\_sequence\_2026320  
ATTTTTATTTTCAACATTCCTCAGCTTAAAAATAATTTACATTCTACAGGATATATTTAT

---

FUGU HITS IN THE CONTEST OF MAMMALIAN rCNE

CLUSTAL W (1.83) multiple sequence alignment

ENSMUSG000005777 TCCTTAACATTTTCATGGGTGACAAATCAATTAATATATTCATTACTCTAATGTTTCGA

ENSCAFG0000007960 TCCTTAGCATTTCATGGGTGACAAAATCAATTAACATATTCATTACTCTAATGTTCTA  
ENSRNOG00000031398 TCCTTAACATTTTCATGGATGACAAAATCAATTAATATATTCATTACTCTAATGTTCTA  
ENSG00000181541 ---ATAGCATTTC-CATGGGTGACAAAATCAATTAACATATTCATTACTCTAATGTTCTA  
SINFRUG00000122928 -----A  
\*  
ENSMUSG00000057777 CTGGCAGCTTTAGTCAGCATGNNNNNNNNNNNNNNNNNNNNNNNNNG--TTGTATGACCT  
ENSCAFG00000007960 CTTGGCAG-TGTAGTCAGTATGNNNNNNNNNNNNNNNNNNNNNNNGCTACGTGACCT  
ENSRNOG00000031398 CTTGGCAGCTTTAGTCAGCATGNNNNNNNNNNNNNNNNNNNNNNNGTGTGTATGACCT  
ENSG00000181541 CTTGGCAGCTTTAGTCAGTATGNNNNNNNNNNNNNNNNNNNNNNNGCTATGTGACCT  
SINFRUG00000122928 TTTGGT---TTTAAAGCAG-GTAAAGTCTTAATTATACCTTTACATGCT-----  
\*\*\*\* \* \*\* \*\*\* \*  
ENSMUSG00000057777 TTGTATTGATTGGGCTAAAATGGCTTTAGCCTGGGTGTGGAAGATGGGCAGTTGGGAGG  
ENSCAFG00000007960 CTGTATTGATTGGGCTAAAATGGTTTAGCCTGGGTGTGGATGATGGGCAGCTGGGAGG  
ENSRNOG00000031398 TTGTATTGATTGGGCTAAAATGGCTTTAGCCTGGGTGTGGATGATGGGCAGTTGGGAGG  
ENSG00000181541 TTGTATTGATTGGACTAAAATGGCTTTAGCCTGGGTGTGGACGATGGGCAGTTGGGAGG  
SINFRUG00000122928 -----  
ENSMUSG00000057777 GAAGACAGAAAAGCACACAAATACACACTCTTATGTTTTCTCTTCCAATTACTGAGGG  
ENSCAFG00000007960 GGCAAGAGGGGAGCACACAAACACATACACTCTTATGTTTTCTCTTCCAATTACTGAGGG  
ENSRNOG00000031398 GGAGAGAGAAAAGCATACAAACATACACACTCTTATGTTTTCTCTTCCAATTACTGAGGG  
ENSG00000181541 GGCAAGAGGGGAGCCTACAAACACACACTCTTATGTTTTCTCTTCCAATTACTGAGGG  
SINFRUG00000122928 -----  
ENSMUSG00000057777 AGATGATAAAAACACAGCAATGATGTATCAGCTCATTTTATCTTATCGCTTTGGGGCTA  
ENSCAFG00000007960 AGATGATAAAAACACAGCAATGATGTATCAGCTCATTTTATCTTATCGCTTTGGGGCTA  
ENSRNOG00000031398 AGATGATAAAAACCCAGCAATGATGTATCAGCTCATTTTATCTTATCGCTTTGGGGCTA  
ENSG00000181541 AGATGATAAAAACACAGCAATGATGTATCAGCTCATTTTATCTTATCGCTTTGGGGCTA  
SINFRUG00000122928 -----  
ENSMUSG00000057777 GGTGACAATGAAGTTCATATTTCACTGGCTCCCATTTGAAGATTTGAAAAATTACTTGCCC  
ENSCAFG00000007960 GGTGACAATGAAGTTCATATTTCACTGGCTCCCATTTGAAGATTTGAAAAATTACTTGCCC  
ENSRNOG00000031398 GGTGACAATGAAGTTCATATTTCACTGGCTCCCATTTGAAGATTTGAAAAATTACTTGCCC  
ENSG00000181541 GGTGACAATGAAGTTCATATTTCACTGGCTCCCATTTGAAGATTTGAAAAATTACTTGCCC  
SINFRUG00000122928 -----  
ENSMUSG00000057777 TCATGACCTGAAATTTCACTAGAAAGACAGAAATTTCTCTTCTGCAAAGTAATGCAATTTT  
ENSCAFG00000007960 TCATGACCTGAAATTTCACTAGAAAGACAGAAATTTCTCTTCTGCAAAGTAATGCAATTTT  
ENSRNOG00000031398 TCATGACCTGAAATTTCACTAGAAAGACAGAAATTTCTCTTCTGCAAAGTAATGCAATTTT  
ENSG00000181541 TTATGACCTGAAATTTCACTAGAAAGACAGAAATTTCTCTTCTGCAAAGTAATGCAATTTT  
SINFRUG00000122928 -----  
ENSMUSG00000057777 TCAGATGTCAACCTTTAGCCAGCTTTAAAAATTAATTTCAATTTATATTAACCAATGATA  
ENSCAFG00000007960 TCAGATGTCAACCTTTAGCCAGCTTTAAAAATTAATTTCAATTTATATTAACCAATGATA  
ENSRNOG00000031398 TCAGATGTCAACCTTTAGCCAGCTTTAAAAATTAATTTCAATTTATATTAACCAATGATA  
ENSG00000181541 TCAGATGTCAACCTTTAGCCAGCTTTAAAAATTAATTTCAATTTATATTAACCAATGATA  
SINFRUG00000122928 -----  
ENSMUSG00000057777 TTGATATTTTACAGAACGCTCTTTGATACATGAAGCACTGACTGGCAAATGATGTTGC  
ENSCAFG00000007960 TTGATATTTTACAGAACGCTCTTTGATACATGAAGCACTGACTGGCAAATGATGTTGC  
ENSRNOG00000031398 TTGATATTTTACAGAACGCTCTTTGATACATGAAGCACTGACTGGCAAATGATGTTGC  
ENSG00000181541 TTGATATTTTACAGAACGCTCTTTGATACATGAAGCACTGACTGGCAAATGATGTTGC  
SINFRUG00000122928 -----  
ENSMUSG00000057777 TCTAGATGGGCAAAACTATTTTACTTTAAGCTGCGATGGCAGGAGATTATGGCAAAC  
ENSCAFG00000007960 TTTAGATGGGTAAAACATATTTTACTTTAAGCTGCTATGGCAGCAGATTATAGCAAAC  
ENSRNOG00000031398 TTTAGATGGGCAAAACTACTTTTACTTTAAGCTGCGATGGCAGGAGATTATGGCAAAC  
ENSG00000181541 TTTAGATGGGTAAAACATATTTTACTTTAAGCTGCTGTGGCACACAGATTATGGCAAAC  
SINFRUG00000122928 -----  
ENSMUSG00000057777 GAAATCCCATTTTCATAAATTAATATTTGTGCTGGAGC-AATGCACCTTTAAGCCTTTGG  
ENSCAFG00000007960 GAAATCCCATTTTCATAAATTAATATTTGTGCTAGAGT-GATGCACCTTTAAGCCCTTGG  
ENSRNOG00000031398 GAAATCCCATTTTCATAAATTAATATTTGTGCTGGAGA-AATGCACCTTTAAGCCTTTGG  
ENSG00000181541 GAAATCCCATTTTCATAAATTAATATTTGTGCTGGAGTGTATGCACCTTTAAGCCCTTGG  
SINFRUG00000122928 -----  
ENSMUSG00000057777 CCTGTAATAAATTCGGACTATTTACTTGGTTCATTTTATTTTCAACATTCCTCAGCTTA  
ENSCAFG00000007960 CCTGTAATAAATTCAGACTCTTTAGTTGGTCTGTTTTATTTTCAATAATAATTACAGCTTA  
ENSRNOG00000031398 CCTGTAATAAATTCAGACTCTTTACTTGGTTCATTTTATTTTCAACATTCCTCAGCTTA  
ENSG00000181541 CCTGTAATAAATTCAGACTCTTTACTTGGT--TGTTTTATTTTCAATAATTCCTCAGCTTA  
SINFRUG00000122928 -----  
ENSMUSG00000057777 AAAAAATAATTTACATTTACAGGATATATATAAAATCCAGNNNNNNNNACTAGTAGT  
ENSCAFG00000007960 AAAAAATAATTTGCATTTCAAAATGATGATCATAAAAGCCATCTTTTATTTGAAAC---ATT  
ENSRNOG00000031398 AAAA-TAATTTATATTTCTATATGATACATTTATAAAATC---CTGATTTTAACTGGAAGT  
ENSG00000181541 AAAA-TAATTTGCATTTCAAAATGATGATCTTAAAGCCATCTTTTATTTCAACTAGCATT  
SINFRUG00000122928 -----

```

ENSMUSG00000057777      TTTTATATAGCGTAATGAG
ENSCAFG00000007960      TAATATGTATCTTAATGAG
ENSRNOG00000031398      TACTATATAGCTTAATGAG
ENSG00000181541         AAATATCAATCTTAATGAG
SINFRUG00000122928      -----

```

## Fragment Mab2112\_23002

Representation of conserved regions within their genic context

Within the mouse context is shown the rCNE from which the tested SCE is derived (red diamond)

Within the fugu context all CHAOS hits obtained from the mouse rCNE are shown (green diamonds, in red the one tested)

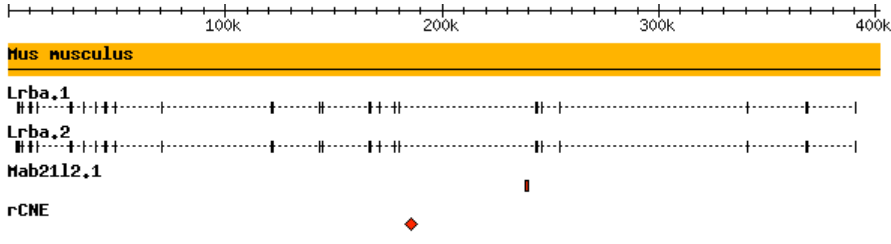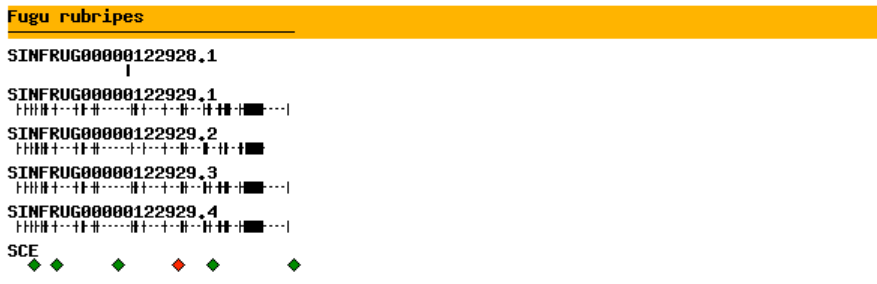

Conserved regions shown within 2000bp context

The mouse context contains:

-rCNEs green boxes, in red the one considered for this test

-SCEs yellow boxes, in red the one considered for this test

-CHAOS hits blue boxes, in red the one considered for this test

The fugu context contains:

-the fragment amplified in this test

-CHAOS hits blue boxes, in red the one considered for this test

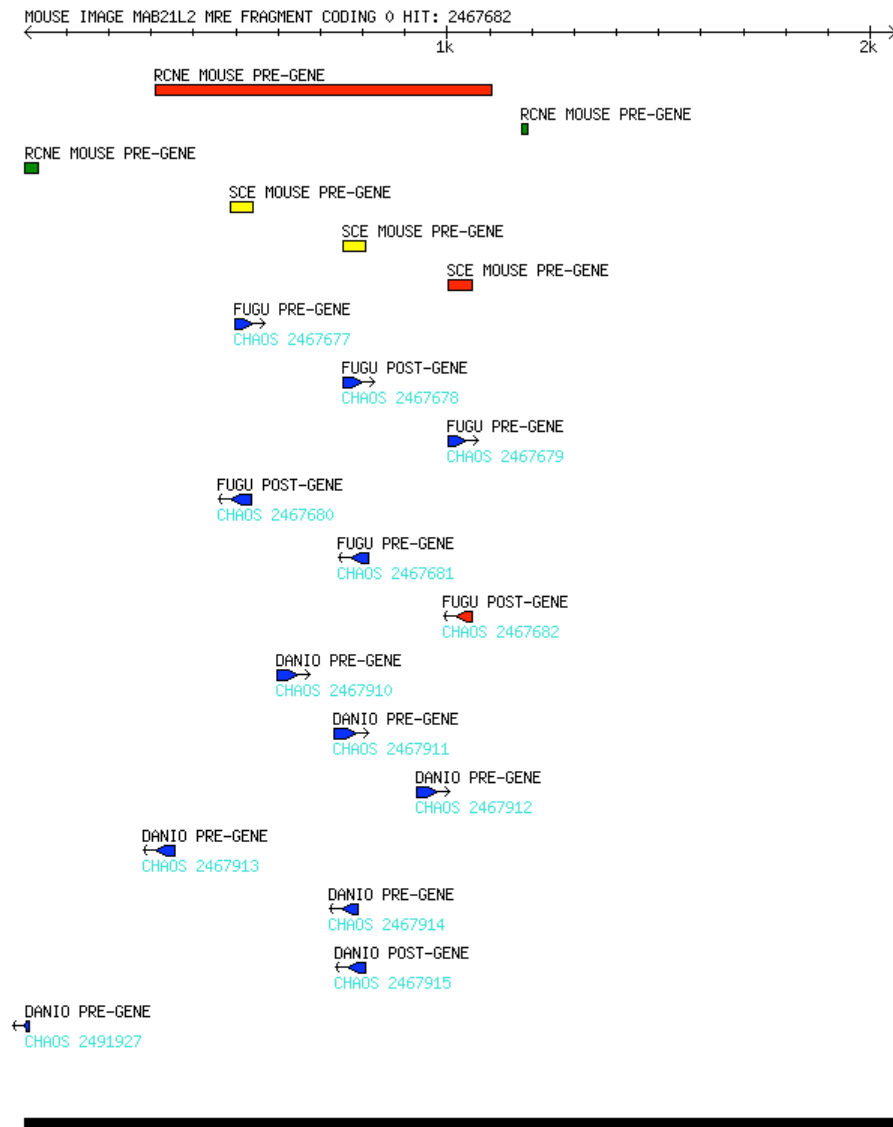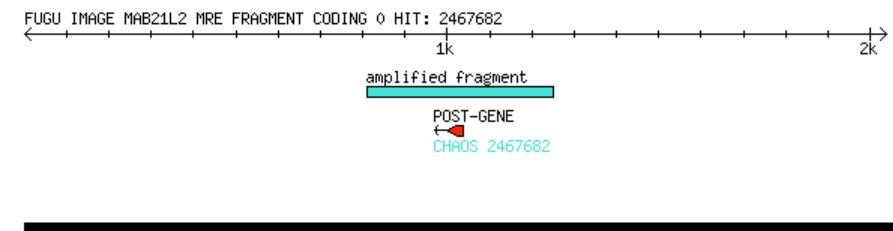

SEQUENCES





```

ENSMUSG00000057777      AAAAAATAATTTACATTCTACAGGATATATTATAAAATCCAGNNNNNNNNAACTAGTAGT
ENSRNOG00000031398      AAAA-TAATTTATATCTATATGATACATTATAAAATC---CTGATTTTAACTGGAAGT
ENSCAFG00000007960      AAAAAATAATTTGCATTCTAAATGATGTATCATAAAAGC---CATCTTTTATTGAACATT
ENSG00000181541         AAAA-TAATTTGCATTCTAAATGATGCATCTTAAAAGCCATCTCTTATTCAACTAGCATT
SINFRUG00000122928      -----

```

```

ENSMUSG00000057777      TTTTATATAGCGTAATGAG
ENSRNOG00000031398      TACTATATAGCTTAATGAG
ENSCAFG00000007960      TAATATGTATCTTAATGAG
ENSG00000181541         AAATATCAATCTTAATGAG
SINFRUG00000122928      -----

```

## Fragment Shh\_12058

Representation of conserved regions within their genic context

Within the mouse context is shown the rCNE from which the tested SCE is derived (red diamond)

Within the fugu context all CHAOS hits obtained from the mouse rCNE are shown (green diamonds, in red the one tested)

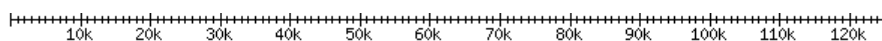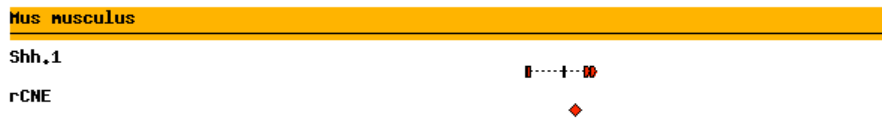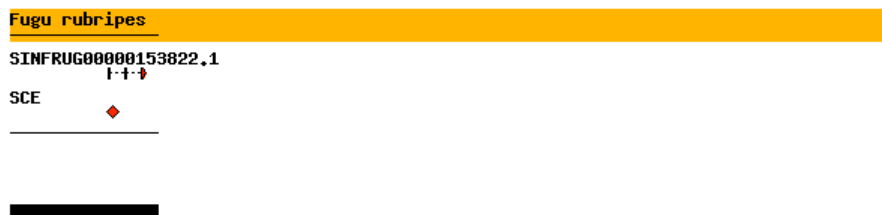

Conserved regions shown within 2000bp context

The mouse context contains:

- rCNEs green boxes, in red the one considered for this test
- SCEs yellow boxes, in red the one considered for this test
- CHAOS hits blue boxes, in red the one considered for this test

The fugu context contains:

- the fragment amplified in this test
- CHAOS hits blue boxes, in red the one considered for this test







```

ENSG00000164690      TCCCGGAGATTGGAATGCAAAGAAGAC--GGCCCTCCCCGCC--TCCTCCCCGGCCCCCT
ENSMUSG00000002633  TCCTGGAGATTGGAATGCAAAGAAGACTAGGACCTCCCCACCCCTCCTCCCTGGCCCCCT
ENSRNOG00000006120  TCCTGGAGATTGGAATGCAAAGA--GACTGGGACCTCCCC--CCGCCTCCTGGCCCCC
SINFRUG00000153822  -----

ENSCAFG00000005102  GCTCGCCACCCCGGCTCCGATCATGTCTC--GGGACAGTGAGCCTCAGAGAGCGACAGA
ENSG00000164690      GCGCTCCGCCCAACTTCAATTATGTCTG--GGGACAGTGAGCCTCAGAGAGCGACAGA
ENSMUSG00000002633  GCGCTCCGCCCATCCTCAAAATTATGTCTCCCGGACAGTGAGCCTGGAGAGCTACGGA
ENSRNOG00000006120  GCGCTCCGCCCATCCTCAAAATTATGTCTCTGGGACAGTGAACCTCCGAGAGCTACGGA
SINFRUG00000153822  -----

ENSCAFG00000005102  GGGCTCGGAAAGCGGGTAGTCAAGGGGCCTTGAGAACGCAGCAGCTTCCAGCGCCTGGA
ENSG00000164690      GGGCTCGAGAAAGCGGGTAGTCAAGGGGCCTTGAGA--CCCGGC--GCTTCCAGCGCTCCGA
ENSMUSG00000002633  GGGCTGAGTAAAGCGGGTAGTCAAGGGGCCTTGAGAACCC--GC--GCTTCCAGCGCTCAGA
ENSRNOG00000006120  GGGCTGGGTAAAGCGGGTAGTCAAGGGGCCTTGAGAACCC--GC--GCTTCCAGCGCTCCTA
SINFRUG00000153822  -----

ENSCAFG00000005102  GCAGGCCCGCCATTTAAAAATCAAATACACATCTTGAGTGCTTGGAAGAG--GCCTGGC
ENSG00000164690      ACAGGCCCGCCATTTAAAAATCAAATACACATCTTGAGTGCTTGGAAGAGAGGCTGGC
ENSMUSG00000002633  GCAGGCCCGCCATTTAAAAATCAAATACACATCTCGAGTGCTTGAAAAGAGGCGGGC
ENSRNOG00000006120  GCAGGCCCGCCATTTAAAAATCAAATACACATCTCGAGTGCTTGAAAAGAGGCGGGC
SINFRUG00000153822  -----

ENSCAFG00000005102  TGTGCAAATAGTGC--TTGTGA
ENSG00000164690      TGTGCAAATAGTGC--T-----
ENSMUSG00000002633  TGTGCAAATAGTGCCTTGTGA
ENSRNOG00000006120  TGTGCAAATAGTGCCTTGTGA
SINFRUG00000153822  -----

```

---



---

## Fragment 3110004L20Rik\_5803

Representation of conserved regions within their genic context

Within the mouse context is shown the rCNE from which the tested SCE is derived (red diamond)

Within the fugu context all CHAOS hits obtained from the mouse rCNE are shown (green diamonds, in red the one tested)

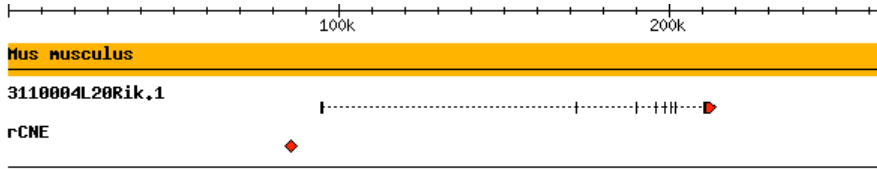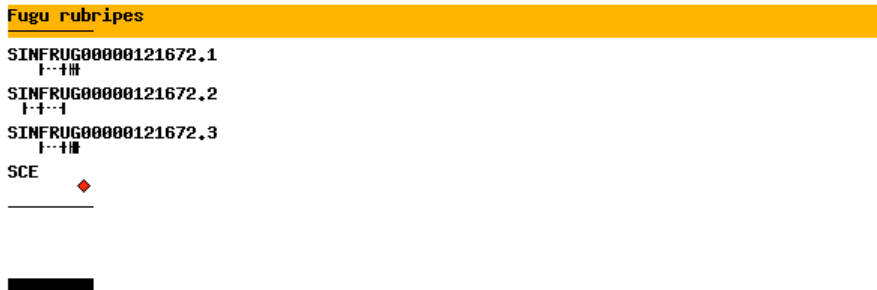

Conserved regions shown within 2000bp context

The mouse context contains:

- rCNEs green boxes, in red the one considered for this test
- SCEs yellow boxes, in red the one considered for this test
- CHAOS hits blue boxes, in red the one considered for this test

The fugu context contains:

- the fragment amplified in this test
- CHAOS hits blue boxes, in red the one considered for this test

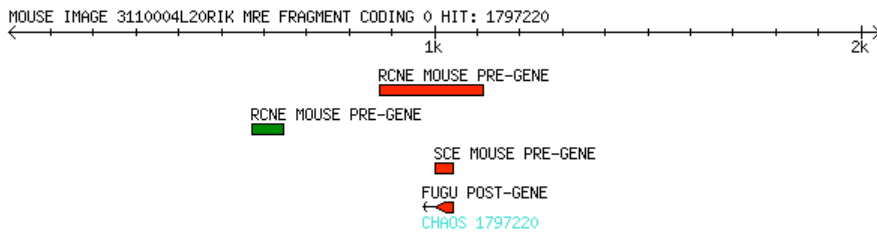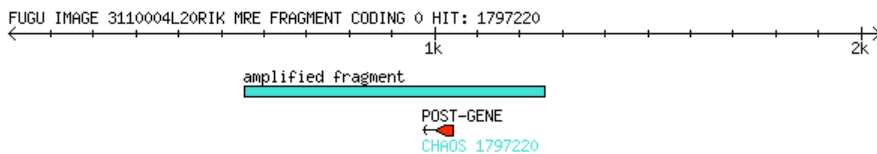

---

SEQUENCES

---

>fugu\_fragment\_for\_primer\_design\_5803  
CCACCCAGCAGCCCTCCCTGATCTCCACCACCCACCATCGAACCCCGGCCAGCTCCG  
TGTTAGAATCCCCGACCCAGTAGAACTCGCAGCGTCTCCCAGAAATCTCCCAGTCTT  
TGCAGGAGGACCTTCAAGCCAGTTAGCAGAACCCTGGTGCCTATCTATGCAGGACAGAC  
CTNNNNNNNNNACCCTCCTCCTCAGTACCAGGTACTGACCATTCCATAGAGCCATCAG  
CCAACCTTTGCCCCCACCAGTCTAACGTGGACCAGTCTCCACCTGGTCCCCTACAC  
ACTCCCCCTTACTCCTCCTGTCACAGACTCCCCCATCACCCAAAATTAGACTCAGCCCTC  
CCTGTATTAAACAGCAGANNNNNNNNNNNNNNNNNNNNNNGCCAAAAGTCCATTCTTGACG  
CTTTGGGTCTGTGTGTCATAGACACTGACGGTACTGCAGCACAAAAGTCCCACAATCTCC  
CAGTGACACAAAATCGTGCGCCCGCCACTCCAGAACCCTCCACAGCCGTTCGCCCGCCAG  
CACAGGGTCCGGTTGCCATTGATTCCTCCAGACTCTTATAGACTGCACTGTCTCCTCGC  
CCATAGACAGGGACACCCCTCTCCTTACCGGACGGTGCAGCCCTGACAAACACACCCCA  
ACGGTGCGCCGTCTGTGTAATCAGTGTGGCAGCCGGCTCTGTGGTACCAGGGGGGT  
CGCTCGGCCCGATGGAACCGTGAAGGTGGGGTGGGGCGGAGGGGTCTGCTTTGACC  
CGAGGCGCCCTCCCTGGTCTTACAGAGCTGCTTACGTCTCGGTGTGCCCTCTTCTGCA  
TTTAGCCAAATGAATACGATCAAGTGAGCGAGTGCAGAGGCTGGTTCATGTGACAGTGTCT  
CCCGCTCGCCGTGAATGTCACTTGAAATCACAGCCTATAAACTACTTTGGTGTAAATGA  
ATGGAAATTTGCTCTGTGAGAGGCGAGGCTGCCCGCCGAGGAGCGTGGGGGAAAACA  
TGCAATCGAGGGGGAAAAAATAATAATAATCCACGGTACTTTTTGCCGAAAATGAAGT  
GTCTGTCTCGTGTGTTTGTCTAGNNNNNNNNNNNNNTGCCCTTACCCTGACGAACAAAAC  
CTGAATGTTCAGCGTATATTTTCAATTCACGATTAACAGAAAACGGCCGAGGTCAACGCA  
CCAAAACACATTTCTGAGTAAAGTCAAGAGAAAAGTGCACAAAATTCCTTCCAAAAT  
CAAAACAAAAGAAATCATGGGTGAAAAGCCAAATATTCAGAAATCAATTTACAGAGCGCGGA  
AGCATTTCTTTGTAATGTGATTTGTAAGTAAAAGCTTAACCTGTGTGGAGCTCGANNN  
NNNNNNNNNNNNNNNNNNNNNNNNNNNNNAAGGATCCAGCGGCCACCCGCTCTGTAAAA  
ATCGTAACTTTCAGTGTGTGGCGTTCGCTCCACGTGGTCTTGGGTGGGGCAGCGAGCATGA  
AAATCAGGGTCTGAGGGTGGCAAAGCAACGTGTCTCATGCCGCCACGTGCACGTACGTT  
TTACAGCAGCTCCATAATTTGCTATAGGAATCATGCGCGATTAGCATCACCTACCTGT  
TTACAATAATAATATCTGTACTGTAAAACCTAGAGCCAACTGAATGATCTCATTTT  
ACATGTACGGGGTTCACATGACATTTGTTTCAGGAAGTGTTCGGTCTACCGCGGCTCG  
CCGTGACTCATATTTTCTCTGTATTCCTGGTCTGTGTGTCCGACACACACGACTG  
CCTGTGAATGTGTTGNNNNNNNNNNNNNNNNNNNNNNNNNNNNNNNNNNNNNNNNNN  
NNNNNNNNNNNNNACAGCACGACGGGGCGGTTTTGGTGGATTTTTCCCTGTGGAGAGTTG  
AAATCTCGCACACGCGGTGTGCTAAGCTCAAAAGCACAAATGCCCTGCAATCATGTGAGC  
TCATATCTGGTGGAGTTCAGAATGGTACAGTNNNNNNNNNNNGGACAGTGGGAAAGA  
ATC

---

>amplified\_fugu\_segment  
GCCATGTATTCCTCCAGACTCTTATAGACTGCACTGTCTCCCGCCATAGACAGGGAC  
ACCCCTCTCTTACAGGACGGTCCAGCCCTGACAAACAACACCCCAACGGTGCCTCGCTG  
TCGTGAATCAGTGTGTGGCAGCCGCGCTCGTGGTACCGGGGGGTTCGCTCGGCCCGAT  
GGAACCGTGAAGGTGGGGTGGGGCGAGGGGTCTGCTTTGACCCGAGGCGCCGTCC  
CTGGTCTTTCAGGAGCTGCTTACGTCTCGTGTGCCCTCTCCCTGCATTTAGCCAATGAAT  
ACGATCAAGTGAGCGAGTGCAGAGGCTGGTTCATGTGACAGTGTCTCCCGCTCGCCGTGA  
ATGTCACTTGAAATCACAGCCTATAAACTACTTTGGTGTAAATGAATGGGAATTTGTCC  
TTGTGAAGAGGACGCGCTGCCCGCAGGAGCGTGGGGGAAAACATGCAATCGAGGGGG  
GAAAAAATAATAATAATCCACGCTACTTTTGGCGAAAATGAAGTGTGTCTCGTGTG  
TTTGTAGNNNNNNNNNNNNNTGCCCTTACCCTGACGAACAAAACACCTGAATGTACAGC  
GTATATTTCAATTCACGATTAACAGGAAACGGGCGAGGTCAACGCACCAAAACACATTT  
CTGAGTAAAGTCAAGAGAAAAAGTGCCAAAATTCCTTCCA

---

>rCNE\_mouse\_sequence\_1573131  
CATTTGTTAATGATAGGGGTCACTTTGAGGTGACTACTGAACAACTTATTAGGTGGCAAC  
TAAATTTGGTCTGGCTGCCCTGGGCTGGTGTAGTAATTTGCTCAGGTGACTGAGTTGGCA  
AAATTTGACGGCTATTTTCTCCACTTCCCTGGATGTTTTTATTAAGTCTCCTGTCTCCC  
GGCCATCTAATAATAAGTGAATGTCTTTTGCATCATTTAACCTTGAGTAAACTCGTC  
AATGGG

---

>SCE\_mouse\_sequence\_1573258  
TATTTTTCTCCACTTCCCTGGATGTTTTTATTAAGTCTCCTG

---

FUGU HITS IN THE CONTEST OF MAMMALIAN rCNE

CLUSTAL W (1.83) multiple sequence alignment

```
ENSG00000137266      -----CACTGTTAATGGATAGGGCTGATCACTGAATGCTTTATTAGCTAGCA
ENSCAFG0000009344    CATTGTAAATTGATAGAAGTTGTGCATTGAGGTGACCCGAGGACGCTTATTAGGTAGCA
ENSMUSG00000038267  CATTGTAAATTGATAGGGGTCAC--TTTGAGGTGACTACTGAACAACCTTATTAGGTGCA
ENSRNOG00000017210  CATTGTAAATTGATAGGGGTCAC--TTTGAGGTGACTCCCAACAACCTTATTAGGTGTA
SINFRUG00000121672  -----

ENSG00000137266      CCTTAATGGGGTCATGGCTGCCCAAGGCCAGGTCGGTCATTG-CTCAGGTGGCTGAACT
ENSCAFG0000009344    ACTAAATTGAGTCGTGGCTGCCCAAGGTCAGGTATGGTTATCG-CTCACGTGGCTGAGTT
ENSMUSG00000038267  ACTAAATTGGGTC-TGGCTGCCCTGGGCTGGGTGTAGTAATTG-CTCAGGTGACTGAGTT
ENSRNOG00000017210  ACTAAATTGGGTC-TGGCTGCCCTGGGCTGGGTGTAGTAATTGGCTCAGGTGACTGAGTT
SINFRUG00000121672  -----

ENSG00000137266      CACAACAGTATTGGCAATTTTC-CTCCAGTCCCCTAAATGCTTT-ATTAAAAATTTCTTCTG
ENSCAFG0000009344    CACAGCAGCATCAGCA-TTTC-CCCCGTCTCCCTGAATGCTTTTATTAAAAATCTTTTGG
ENSMUSG00000038267  GGCAAAATGTCAGGCTATTTTCTCCACTTCCCTGGATGTTTTTATTAAAGTCTC--CTG
ENSRNOG00000017210  GGCCAAATGTCAGGCTATTTT-CTTCACTTCCCTGGATGTTTTTATTAAAGTCTC--CCG
SINFRUG00000121672  -----TATTTTTTTTCCCCCTCGATTGCATGTTTTTCCCCCGAGGCTC--CTG
                               *** * * * * ** * * *
                               * * * * *

ENSG00000137266      CCTCCTGGCCATCTCATAGAAGCATAATATACTCATTTCATCCTTFAACCTCAAGTAAA
ENSCAFG0000009344    TCCTCCTGGCCATCGAATCTCAGCATAATGTGCTCTTTTGCATCTTFAACCTCAAATAAA
ENSMUSG00000038267  TCCTCCGGCCATCTAATATAAGTGAATGTGCTCTTTTGCATCATTFAACCTTGAGTAAA
ENSRNOG00000017210  TCACCCGGCCATTTAATATAAGTGAATGCACCTCTTTTGCATCATTFAACCTTGAGTAAA
SINFRUG00000121672  -----

ENSG00000137266      CTCATCAATGGG
ENSCAFG0000009344    CTCATCAATGGG
ENSMUSG00000038267  CTCGTCATGGG
ENSRNOG00000017210  CTCATCAATGAG
SINFRUG00000121672  -----
```

---

## Fragment 3110004L20Rik\_5802

Representation of conserved regions within their genic context

Within the mouse context is shown the rCNE from which the tested SCE is derived (red diamond)

Within the fugu context all CHAOS hits obtained from the mouse rCNE are shown (green diamonds, in red the one tested)

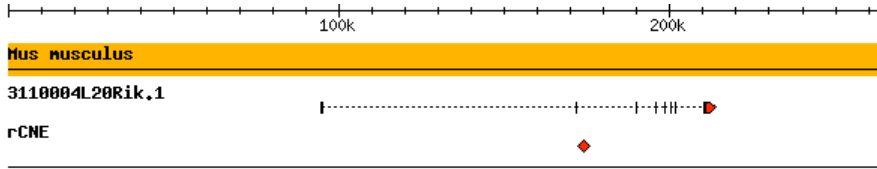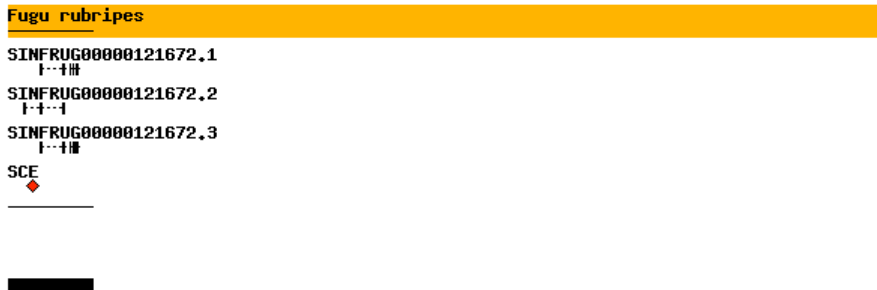

Conserved regions shown within 2000bp context

The mouse context contains:

- rCNEs green boxes, in red the one considered for this test
- SCEs yellow boxes, in red the one considered for this test
- CHAOS hits blue boxes, in red the one considered for this test

The fugu context contains:

- the fragment amplified in this test
- CHAOS hits blue boxes, in red the one considered for this test

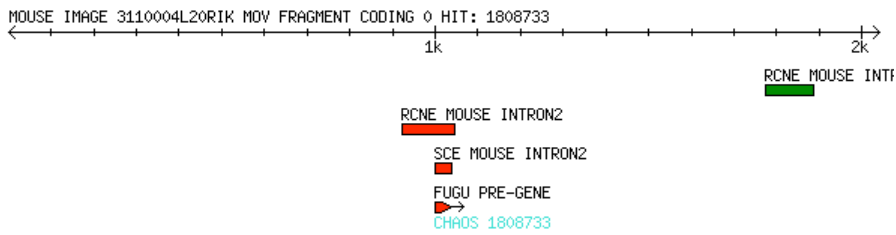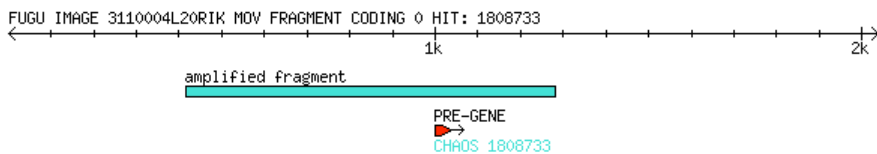

---

SEQUENCES

---

>fugu\_fragment\_for\_primer\_design\_5802  
TCCCATCTCCCAAGGTCCTGACCAGAGATGGGTGGGACGTGAGGGATGACTCGGTGTTG  
AGGACACTTCATAGCGTCCAGCGCTCTCCGTCCTTTGTGACACATTATGTGACCATA  
GTAACGCATTTAGTTGCTTCACCACCACCGAATCGGAGAAGACACGGGACAGATCGCCG  
GTGGGAGTAGTCCAGGAGGTGAACCTAGAGTCCCAGGAGTCTAGAAATGATTGTATAT  
GATTACACTCAGCCAGCTAGCTTCTCTGTAAATGTGGCCGAGATATTTGGGCACAAA  
GTGTCTTTAAATGAGACTTTTATGTCCACCTTGGCTCCATCTGCAGTGTGAGGACT  
CGGCCCTTTACCCCGTCCCCACTGACGGGACAGGGTACAGATGTTGGACAGACTGTTTA  
GCTCCAGCCCTGATGTCATACCTGAGAGTATTGTGTGAACCTGATAATGAGGAGCTCTG  
TATAATCTGTGTTAGTGGTGCAGGCAGGGCCGTTATCACTGTTTTGGAGGTGGGACGCC  
CATAGATCAGAAAGATGACACCGCCCGGAGGCCTCGCTGCGCCGCGTCCCTTCATATTT  
ACTCAGCTGGCTGGCCCCCGCGCAGACCCAGATCAGCGTGGGACGCTCTGAAATGATC  
ACAGCTGTCTGAAGTGACGGCCCGCTGCAGATACCGAATCTACCCACAATGGGAGCCT  
GCGCCGAAAAGGCGTGTGACCCAAAGATAAAGCGCCCGCCGCTCTACTGTGCTGTGA  
TAGGGGGGCTGTCTGGTCCGGGGAGGGGACGCAGTCCGGGGTCTCTAACCTTCGCCAC  
GGTTAAGGTTTTGTTGTTGGAGCTTGTAGTTAAGCAGGAATGTGGCTGGGACAGGGTTGG  
GGCAGGGTACAGCAGCCCTGCAGCGGAGCTGTGCAGCCTCGGGCCGCAACGGTAA  
ATGCAAAAGAACAGCTAATTAATTTCTTTGGAGCTGCTCAAAATTTGTCGTTGCCATTC  
AGTGTGACAGCAAGTGCAGCGTGTGGACGCCAGTGTTCAGAGGAAAAGCCCTCGATGTT  
TACGCAGCAGTAAATACGTTAATTTCCACACCGAGCATCCCCACGCGTGTCACTATGTGAT  
GCTAACCTTTTATCTGTGGCTGGGCTCAGCAAACCTGGCGCTCTCTGCTGCGGCTGTCTG  
CTACTACTTCTCTCCAGTTGTTGGGTTTTTACAAATGTTGCTGGTGTTCCTCATGAAG  
CTGTTCGAGGTTAGTGTCTGTGGAGGGGGGCGTTTGTCTTTTGGGCCACCAAAGCTC  
ATGTGGACTAATGAAACCGCTGGATTCTCTCGTCAATTTCCCACTCATTATTTCTCC  
ATCATCATCCTGTAAACGACACCCGTTAATGGCTTTAGCCAGGACGGCGCCGCCACA  
GGGTGGCGGAGGAGAGTGTGCTGAGCAGTAGCTCTGCCGACAGATCTCTGTGTGCAG  
TTGNNNNNNNNNNNNACACAGTGTGGTCAATTTGAAGCCGACAGCTAAATTTCTAGA  
TTCACTTCTCAATGTGGTGTGTTTCAGCCAGCCCGCTAGAGCCCGCCCTGTCCGGGAT  
CGAGGAACACCGTTGAGCAACAAAATGTAACCAGGTTACTCGTGGATTGCTTTTGTCT  
AATCTTCTCTCTCCGCTCTCCCTCTGTGCTGCTCTCTATCGNNNNNNNNNNNNAC  
CATCCCGGGCGTGCAGTTCACCGAGTGCAGAAATGTGCAGCTGCAGTTGAGGGCGTCT  
CATCCGAGCTCGCCCGCGGCTGTGGCCGGCCACCGCGGCCATCGGGCTTGGGCTTG  
GCTGCACGCTGGGGATATGGACTGATTTGCTGCTTGGCTCTGAAATTTCCCACTAATG  
AATCTGCAGCGCAAGCCGACTCTGCACCTGCTCCAAATGAGCGAGACAATGGGGAGAAG  
CTGCCGGGGCTAATGAGGCCGCGGGCACGGCCCCACAGATTTGACACGTTTCGAGG

---

>amplified\_fugu\_segment  
GTTTAGCTCCAGCCCTGATGTCATACTGAGAGTATTGTGTAACCTGATAATGAGGAGC  
TCTTGTATAATCGTGTAGTGGTGCAGGCAGGGCCGTTATCACTGTTTTGGAGGTGGG  
ACGCCATAGATCAGAAAGATGACACCGCCGCGGAGGCTCGCTGCGCCGCGTCCCTTCA  
TATTTACTCAGCTGGCTGGCCCGCCGCGCAGACCCAGATCAGCGTGGGACGCTCTGAAA  
TGATCAGCTGTCTGAAGTGACGGCCCGCTGCAGATACCGAATCTACCCACAATGGG  
AGCCTGCGCCGAAAAGGCGTGTGACCCAAAGATAAAGCGCCCGCCGCGCTCTACTGTGCG  
TCTGATAGGGGGGCTGTCTGGTCCGGGGAGGGGACGCAGTCCGGGGTCTCTAACCTTC  
GCCACGGTTAAGGTTTTGTTGGAGCTTGTAGTTAAGCAGGAATGTGGCTGGGACAGG  
GTTGGGGGAGGGTACAGCAGCCCTGCAGCGGAGCTGTGCAGCCTCGGGCCGCAAC  
GGTAAATGCAAAAGAACAGCTAATTAATTTCTTTGGAGCTGCTCAAAATTTGTCGTTGC  
CATTCAGTGTGACAGCAAGTGCAGCGTGTGGACGCCAGTGTTCAGAGGAAAAGCCCTCG  
ATGTTTACGACAGTAAATACGTTAATTTCCACACCGAGCATCCCCACGCGTGTCACTAT  
GTGATGCTAACCTTTATCTGTGGCTGGGCTCAGCAAACCTGGCGCTCTCTGCTGCGGCTG  
TCGTTCTACACTGTCTCTCCAGTTGTGGGTTTTTACAAATGTTGCTGGTGTTCCTCA  
TGAAGCTGTGAGGTTAGTGTCT

---

>rCNE\_mouse\_sequence\_1573175  
GGTGAATGGTAGCACCGCCAGCACAAACAGCTGTTGGTGGCAAAGTACAGAGAGTGACA  
CATTTTCTCTAAACAAGGAAGTATATACTGCCTGCATTCAAGGTGCCACGAAAGATGCTTG  
GT

---

>SCE\_mouse\_sequence\_1573257  
AAGTATATACTGCCTGCATTCAGGGTGCCAGCAAGATGC

---

FUGU HITS IN THE CONTEST OF MAMMALIAN rCNE

CLUSTAL W (1.83) multiple sequence alignment

```
ENSRNOG00000017210      GGTGAATGAGAGCATCGGCCAGCAGCAGCAGCTGTTGGTGGCAAAGTACAGAGAGTGAC-
ENSG00000137266        GGTGAGCTGTAGCACCAGCCAGCATGACCAGCTGTTGGTAGCAACATATTGAAAGTTGCT
ENSMUSG00000038267      GGTGAATGGTAGCACCCGGCCAGCACCAACCAGCTGTTGGTGGCAAAGTACAGAGAGTGACA
SINFRUG00000121672      -----

ENSRNOG00000017210      -ACATTTCTTTAACAAGAAGGTATTTACTGCCTGCACTTGGGGTGCCAGCAGCATGCTT
ENSG00000137266        TGCTTTCCTTTAATGAGCAAGTATTTATTCATGCACC-AGGGTGCCAGCAGCGTACTT
ENSMUSG00000038267      CATTTTCCTT-AACAAGGAAGTATATACTGCCTGCATTCAGGGTGCCAGCAAGATGCTT
SINFRUG00000121672      -----AAATATTTGTGCTGCCATTTCAGTGT-TGCAGCAAGCTGC--
                               *  * * * *  *  * *  * * * * * * * *
                               *  * * * *  *  * *  * * * * * * * *

ENSRNOG00000017210      GAT
ENSG00000137266        GGT
ENSMUSG00000038267      GGT
SINFRUG00000121672      ---
```

## Fragment Elmo1\_6026

Representation of conserved regions within their genic context

Within the mouse context is shown the rCNE from which the tested SCE is derived (red diamond)

Within the fugu context all CHAOS hits obtained from the mouse rCNE are shown (green diamonds, in red the one tested)

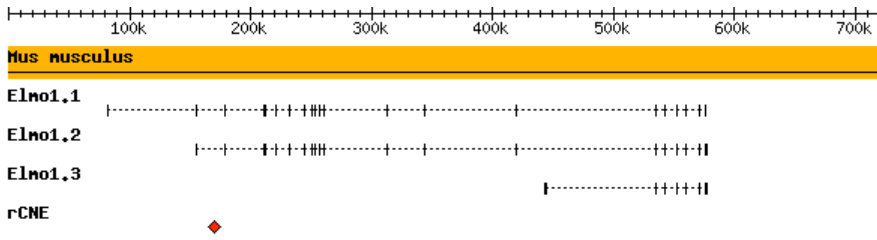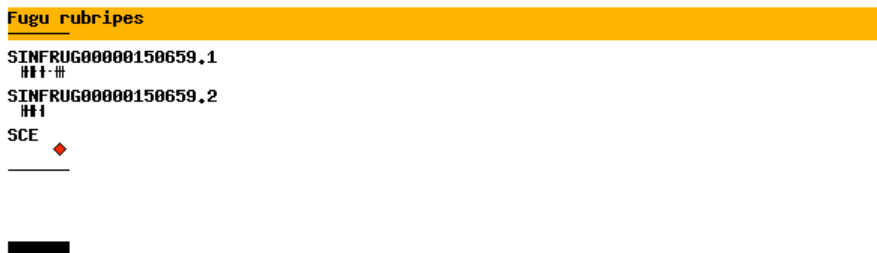



Conserved regions shown within 2000bp context

The mouse context contains:

- rCNEs green boxes, in red the one considered for this test
- SCEs yellow boxes, in red the one considered for this test
- CHAOS hits blue boxes, in red the one considered for this test

The fugu context contains:

- the fragment amplified in this test
- CHAOS hits blue boxes, in red the one considered for this test

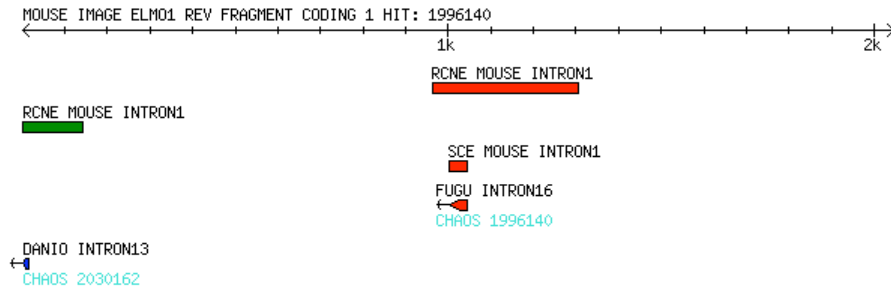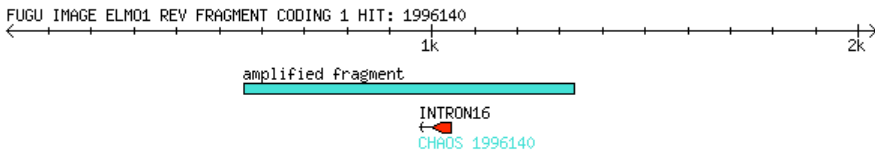

## SEQUENCES

```
>fugu_fragment_for_primer_design_6026
ATGTATTATTCACCTCTGACCTCACACATCCAACAGCAACAGCAATGTATGCAGATGCTTG
AGACTACTCGGGAAACGTCGACAACATAGTCGTGCTGGCAGCACATCATTTGCAACAGTG
ATGCTGTTGGAACTCCGCCTATAAGGGGGAAAAACCACCTACATGCTGCATCAGATGTG
ACTGACATAATTCTCTGGTGTGTGTCTTGTTTTCTGAAGAXXXXXXXXXXXXXXXXXXXXX
XXXXXXXXXXXXXXXXXXXXXXXXXXXXXXXXXXXXXXXXXXXXXXXXXXXXXXXXXXXXXXXXXX
XXXXXXXXXXXXXXXXXXXXXXXXXXXXXXXXXXXXXXXXXXXXXXXXXXXXXXXXXXXXXXXXXX
CAGCCTCCCCCGCAGACCAACAGCTTTTCTGACAGTTTGGTCTTTGGCTGAGGTTTA
ATGGCAGGAAGATGGTAGAGAGAAACCAGCAGTCTCACTCTGAGCGTCCGTTCACTCCT
GCTTTCACGGCATFAAAACCCCACTGAAGATGAGGCCCTTTGGACAAGCTGCAGAGCTGCC
GTACATGGCGGCTCCGCCAATATTTCCCATCAGCCTTTGAGGCCAGGATGCTTGCAGCA
CAGCACCTCGCTCAACACAACTCGCATTTTTTAAAAATCACAATCTGGCAGATAAAGC
AACTCATTTGATCCAGGGGAATGATTAGGGTCATTAATTTGTCTGATTTATCACATGT
GCTGATAAAGATCACACCAGAACATGCTTTGTTTTTAAAGCAATCAGCAATATTAATTT
TTCCCATCCCTCTGCTGGATGCTGATTTGATCCATGACAACGATCCGGTAGCAGCAAG
CGGCATATTTAATACGGTCATTGCGGTAAAAATGCTGGCAAGAGTAAGGTGACATTAATA
GCCTCAGGAGGAGCAGCTGTGGGTAGCAGAGAGAAACCGGGTCCGGGTCGGATCCCAAC
AACAGGTGCAAAGGATCAGCAGTCAAAGACGGGAGATTTGGGAGCAGCTCAGCCAGATG
TTTCACATCCATGATAAGAACAGGAGCTGAGGTCCGCTGTCCGCTGTCCCAACAACAC
ACAAAATCAAACGCCACTGTTGGTTTCCCTGAAGCTTCAGTCAGACCGAAGAGAACCGG
ACGTGCTCTACTCCTCTTTACCCCCCGAGGTTTCATCGATAGATTTTAAATGTCTGACAA
GGATTCGCTTTGACAGCTGTGCCCCAGATGTTGCCAGAGCTGCCTGATGAAATAGAGAG
```

AGCCTAAGGAGAGCGAAGGGGCGGACGGGCTGATTTATGCTGGGCTGGCTTTTAAGACAT  
TGTGACGCGTGGCGCTCCCGTGCACAGAGTGAAGGCTGCAGGGTTACACCAGTTTCCA  
CTTTTCCCTTACTACTCATGGAGATGCTCTCATCTCCCTCCGCTGGGGTCTTTGCTCCTC  
ATCTTCTCCTCCTCCTCCTGAAAGGCTCTTTGTCGGGCGAAACTGCAAGAAATAAAA  
GGGCGTTAAATTTCCCTCCCTGGTTTAAAGAGGCGTGGCAAACGTTCTCAAACGTTTAACTG  
CCCCCTCCGTTGCTTTGTTACCCCTCCTCCACCCCTCCATTTTAGTACCTGCATCAA  
AGATTCATTTCCGCAACTTCAGCCCGGATGACTGGGCTCTTCCCCCGCCTTCCCTFCAC  
ATCGACCTGTTCGGAAGAAAAGCAGGAGCCAAATTTGTCAAATTTGGCCCATCCTC  
TTGGATCTCACTCCACTGCCACGCTCCTGGCTACAGATTTATTTAGATAAATTATAGCT  
GAAGAGTCTGATCCTAGAGGGAGATGCACGCATCTATTAATGCCAGCTGAAGAACATAT  
GCGCCCGCACAGTCCACGTGAATCAGCTCGCTCAGTTGAGCCGTGAGGCTCGGAAAAG  
TCTCCTGTACACGCTCCCGGTGGACTGACTGCTTCTGCACGCCAGGTACGACCAGA  
TGTCTATTTTACGCAATTAGGATTTGAGCGGCGCACCGGCTCCCGGCTCTGAGCGC  
GCT

>amplified\_fugu\_segment

CCAATATTTCCATCAGCCTTTGAGGCCAGGATGTCCTGCAGCACAGCACCTCGCTCAAC  
ACAACCTCAGATCTTTTAAATCTACAAATCTGGCAGCAAGCAACTCATTTGATCCAG  
GGGAAATGATTTAGGTCATTAATTTGTCTGATTTATCAGATGTGCTGATAAAGATCACA  
CCAGAACATGCTTTGTTTTTAAGCGAATCAGCAAAATTAATTTTCCCATCCTCTTGC  
TGGATGCTGATTTGATCCATGACAACGATCCGGTAGCAGCAAGCGGCATATTTAATAC  
GGTCAATTCGGTAAAATGCTGGCAAGAGTAAGGTGACATTAAGAGCTGCAGGAGGAGCA  
GCTGTGGGTAGCAGAAGAGAACCGGTCGGGGTCCGATCCCAACAACAGGTGCAAGGAT  
CAGCAGTCAAAGACGGGCAGATTTGGGAGCAGCTCAGCCAGATGTTTCACATCCATGATA  
AGAACAGGAGCTGAGGTCCGCTGTCCGCTGTCCCAACAACACAAAATCAAACGGCC  
ACTGTGGTTTCCCTGAAGCTTCAGTCAGACGAAAGAGAACCGGACGCTGCTCTACTCCT  
CTTTACCCCCAGGTTTCATCGATAGATTTAAATGTCTGACAAGGATTCGCTTTGACAG  
CTGTCGCCAGATGTTGCCAGAGCTGCCTGATGGAATAGAGAGGCTAAGGAGAGCGGA  
AGGGCGGACGGGCTGATTTATGCTGGCTGGCTTTAAGACATTTGACGCGTGCG

>rCNE\_mouse\_sequence\_1764573

GTGGCTGGCAGATTTAGAGAACTCGGCCCATAGTACCTGTCACTGACAGGTGTGTGGG  
TACATCAGCTGGGCTGCTGCCAGCTGCAGCAGGCAGGTGGCAAGGCAGAAACGTGGACAG  
CAACAGATTTGAAAGCTCGAAGGTGAACAAGGGGGCTGGTAAAGTCCCAAGCCAGGAG  
TGTGGTTGGCAGTTCAGGAACAGGTGCTGTGTAGCCAGGAGCAGCCAGGATCATCTCTGT  
GCTGACTGGGAGGATCTCTGATGAGGGATAGATAACAGCTGAGAGGTCTCCTGGGAAAG  
TGCTCCTGGCAGGCTAGCCTGGCTTCTCTCAAACAACAGCC

>SCE\_mouse\_sequence\_1764967

CCTGTCACTGACAGGTGTGTGGGTACATCAGCTGGGCTGCTGCCA

FUGU HITS IN THE CONTEST OF MAMMALIAN rCNE

CLUSTAL W (1.83) multiple sequence alignment

```
ENSG00000155849      GTGGATGTCAGAGCT--GAGAACGGCAGCCCATGCTCCATAGTGGCTAAAACAGGTGTGTG
ENSRNOG0000018726   GTGGCTGGCAGATTTAGAGAACTGCAGCCCATAGTGCCCTGTCACTGG--CAGGTGTGTG
ENSMUSG0000041112   GTGGCTGGCAGATTTAGAGAACTGCAGCCCATAGTACCTGTCACTGA--CAGGTGTGTG
SINFRUG00000150659   -----CCTGTTCTTAT--CATGGATGTG
                                     ** * ** * ****

ENSG00000155849      GGCACATTTGGCTGGGGCGCTGCCAGTCTCAGCAGGCCAGTGTCAAGGCAGAAATGTGGG
ENSRNOG0000018726   GGTACATCAGCTGGGT-TACTGCCAGCTGCAGCAGGCAGGTGGCAAGGCAGAAACGTGGA
ENSMUSG0000041112   GGTACATCAGCTGGG-TGCTGCCAGTGCAGCAGGCAGGTGGCAAGGCAGAAACGTGGA
SINFRUG00000150659   AAACATCTGGCTGAGC-TGCTCCCA-----
                                     **** * ** ***

ENSG00000155849      CAGCAACAGACTTGAGCTCTCCAAGGTGAGCATTTGGGCTTAGTAAAGTCCCAAGCCAG
ENSRNOG0000018726   CAGCAGCAGATTTGGAATGCTCAAAGGTGAACAG--GGTCTGCTTAAAGTCCCGGAGCCAG
ENSMUSG0000041112   CAGCAACAGATTTGAAAGCTCGAAGGTGAACAAGGGGGCTGGGTAAAGTCCCAAGCCAG
SINFRUG00000150659   -----

ENSG00000155849      GTGCCTTGGCCAACAGACAGGAACAGGTGGCTGCGCAGCCAGGCTGCCAGTGTCTATC
ENSRNOG0000018726   GAGTGTGGATGGCAGTCAGGAACAGGTGGCCAGTAGCCAGGATCATCCTGTGCT----
```

ENSMUSG0000041112 GAGTGTGGTTGGCAGTCAGGAACAGGTGGCTGTGTAGCCAGGAGCAGCCAG-GATCATC  
SINFRUG00000150659 -----

ENSG00000155849 AGAGGCAGGGCAGGGAGGGCTCTGATGAGGGCTG---ACAGCTGGGGGTCCTGGG  
ENSRNOG00000018726 -----GGACCGGAGGATCTCTGATGAGGGATA---ACAGCTGAGAGGTCCTGGG  
ENSMUSG0000041112 CTGTGCTGGACTGGGAGGATCTCTGATGAGGGATAGATAACAGCTGAGAGGTCCTGGG  
SINFRUG00000150659 -----

ENSG00000155849 AAGGTGCTTCCAGGAAGGCTGGACTGGCCATCTCCTAAATAAACAGCC  
ENSRNOG00000018726 GAAGAGCCTCCTGGCAGACTGGCTTGGCTTCTTAAATAAATAGCC  
ENSMUSG0000041112 AAAGTGCTCCTGGCAGGCTAGCCTGGCTTCTCCTAAACAAACAGCC  
SINFRUG00000150659 -----
