# Supplementary material for: Shuffling of cis-regulatory elements is a pervasive feature of the vertebrate lineage
Source: PubMed Central journal article supplement (PMC1779573; doi:10.1186/gb-2006-7-7-r56), 2006-07-19

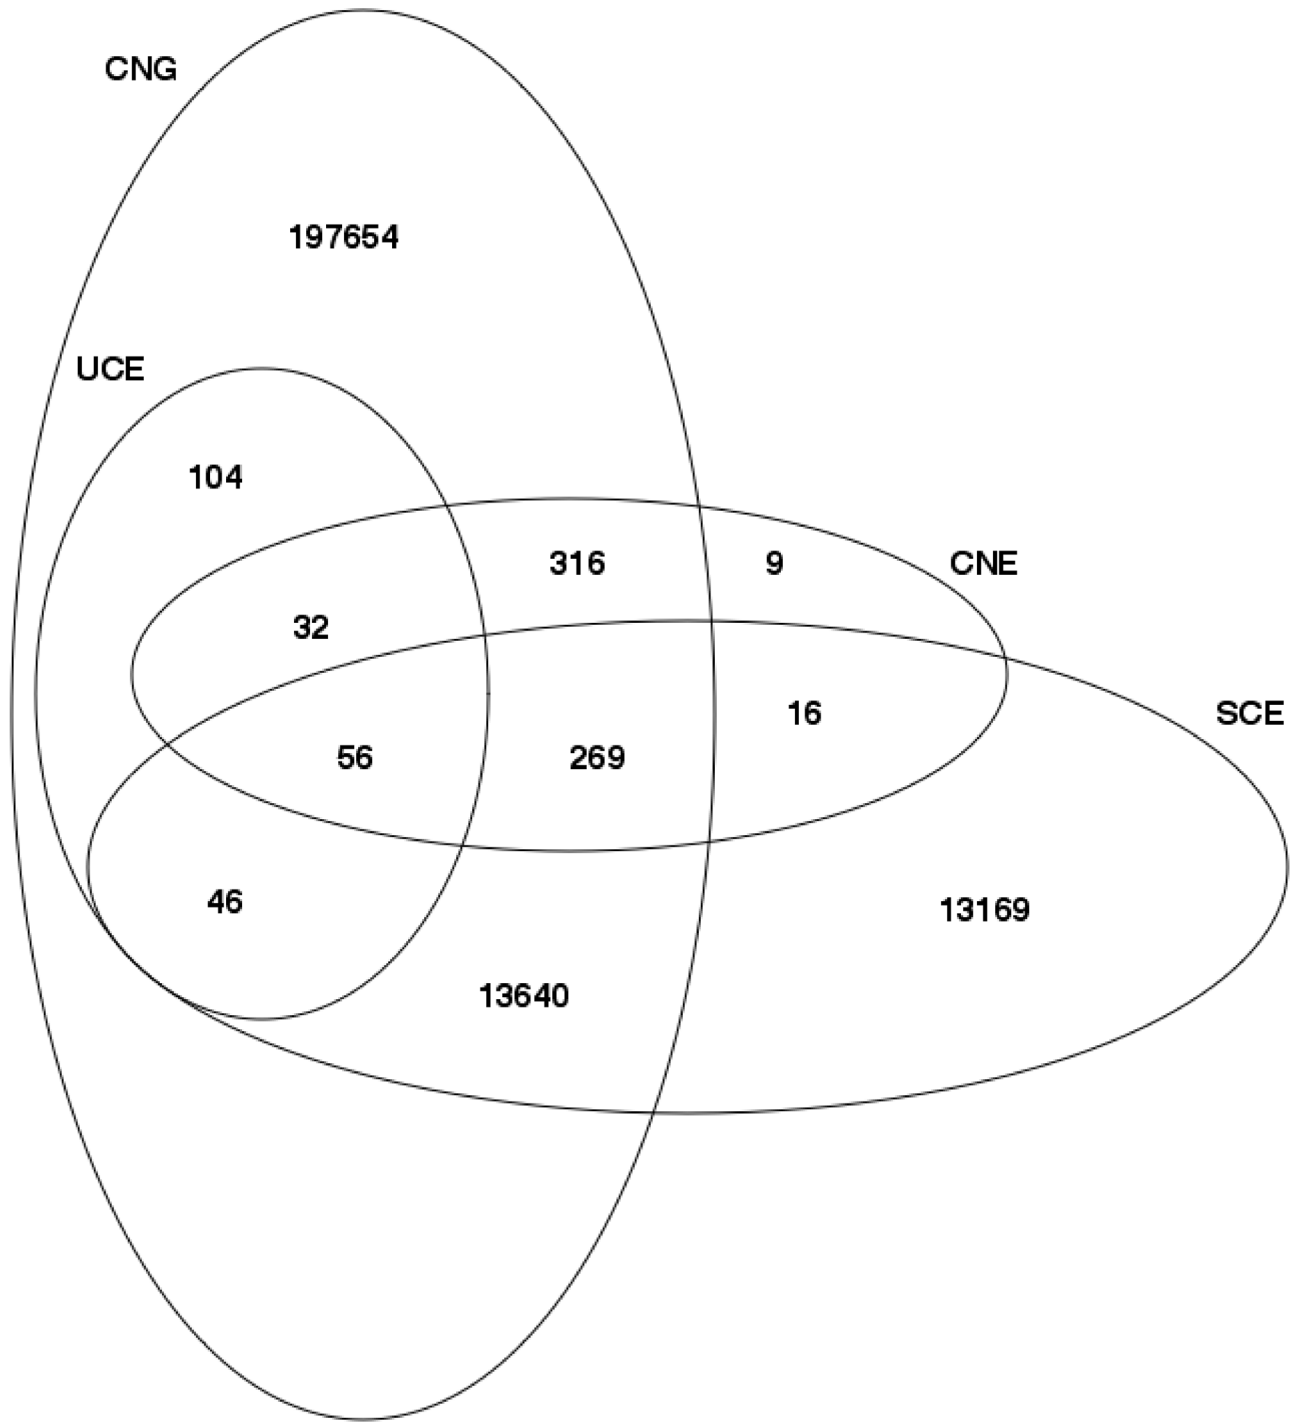

Supplement: gb-2006-7-7-r56-S5.pdf [file gb-2006-7-7-r56-S5.pdf]
